# Supplementary material for: Canning Processes Reduce the DNA-Based Traceability of Commercial Tropical Tunas
Source: MDPI journal article supplement (doi:10.3390/foods9101372), 2020-09-27
Supplement: s1 [file s1]

# Supplementary Material

Pecoraro et al. Canning processes reduce DNA-based traceability of commercial tropical tunas

Table S3: Summary information of the samples used in this study and their molecular identification results. Morph. ID = Morphological identification for the four species (*Thunnus albacares* = YFT; *Thunnus obesus* = BET; *Katsuwonus pelamis* = SKJ; *Thunnus tonggol* = LOT;) achieved at the canneries; Ocean (Indian Ocean = IO; Atlantic Ocean = AO; Western-Central Pacific Ocean = WCPO; Eastern Pacific Ocean = EPO); amplified fragment of the of the mitochondrial gene Cytochrome b (AB, A, B); Blast ID = species genetically identified in GenBank (www.ncbi.nlm.nih.gov) using the BLASTn search tool; % Similarity = genetic similarity in GenBank; Accession number of the species genetically identified in GenBank.

| Morph. ID | Ocean | Level | Specimen | Fragment | Blast ID                                                                     | % Similarity | Accession number                   |
|-----------|-------|-------|----------|----------|------------------------------------------------------------------------------|--------------|------------------------------------|
| YFT       | AO    | L1    | 1        | AB       | <i>Thunnus albacares</i>                                                     | 99.58%       | MG017682.1                         |
| YFT       | AO    | L2    | 1        | AB       | <i>Thunnus albacares</i>                                                     | 99.58%       | MG017682.1                         |
| YFT       | AO    | L3    | 1        | AB       | <i>Thunnus albacares</i>                                                     | 99.15%       | MG017682.1                         |
| YFT       | AO    | L4B   | 1        | B        | <i>Katsuwonus pelamis</i>                                                    | 100.00%      | KP669132.1                         |
| YFT       | AO    | L4O   | 1        | B        | <i>Thunnus obesus</i>                                                        | 98.17%       | MG017696.1                         |
| YFT       | AO    | L1    | 2        | AB       | <i>Thunnus albacares</i>                                                     | 99.58%       | MG017682.1                         |
| YFT       | AO    | L2    | 2        | AB       | <i>Thunnus albacares</i>                                                     | 99.58%       | MG017682.1                         |
| YFT       | AO    | L3    | 2        | AB       | <i>Thunnus albacares</i>                                                     | 99.58%       | MG017682.1                         |
| YFT       | AO    | L4B   | 2        | B        | <i>Katsuwonus pelamis</i>                                                    | 100.00%      | KP669132.1                         |
| YFT       | AO    | L4O   | 2        | B        | <i>Katsuwonus pelamis</i>                                                    | 100.00%      | KP669132.1                         |
| YFT       | AO    | L1    | 3        | AB       | <i>Thunnus albacares</i>                                                     | 98.31%       | KX755269.1                         |
| YFT       | AO    | L2    | 3        | AB       | <i>Thunnus albacares</i>                                                     | 98.31%       | MG017682.1                         |
| YFT       | AO    | L3    | 3        | -        | -                                                                            | -            | -                                  |
| YFT       | AO    | L4B   | 3        | B        | <i>Katsuwonus pelamis</i>                                                    | 100.00%      | KP669132.1                         |
| YFT       | AO    | L4O   | 3        | B        | <i>Thunnus albacares</i>                                                     | 99.08%       | MG017686.1                         |
| YFT       | EPO   | L1    | 1        | AB       | <i>Thunnus albacares</i>                                                     | 99.15%       | MG017682.1                         |
| YFT       | EPO   | L2    | 1        | AB       | <i>Thunnus albacares</i>                                                     | 99.15%       | MG017682.1                         |
| YFT       | EPO   | L3    | 1        | AB       | <i>Thunnus albacares</i>                                                     | 99.15%       | MG017682.1                         |
| YFT       | EPO   | L4B   | 1        | B        | <i>Katsuwonus pelamis</i> , <i>Thunnus albacares</i> , <i>Thunnus obesus</i> | 96.33%       | KP669132.1, MG017683.1, KJ018958.1 |
| YFT       | EPO   | L4O   | 1        | B        | <i>Thunnus albacares</i>                                                     | 98.17%       | MG017683.1                         |
| YFT       | EPO   | L1    | 2        | AB       | <i>Thunnus albacares</i>                                                     | 99.15%       | MG017682.1                         |
| YFT       | EPO   | L2    | 2        | AB       | <i>Thunnus albacares</i>                                                     | 99.15%       | MG017682.1                         |
| YFT       | EPO   | L3    | 2        | AB       | <i>Thunnus albacares</i>                                                     | 99.15%       | MG017682.1                         |
| YFT       | EPO   | L4B   | 2        | B        | <i>Katsuwonus pelamis</i>                                                    | 99.08%       | KP669132.1                         |
| YFT       | EPO   | L4O   | 2        | B        | <i>Thunnus albacares</i>                                                     | 98.17%       | MG017683.1                         |
| YFT       | EPO   | L1    | 3        | AB       | <i>Thunnus albacares</i>                                                     | 99.15%       | MG017682.1                         |
| YFT       | EPO   | L2    | 3        | AB       | <i>Thunnus albacares</i>                                                     | 99.15%       | MG017682.1                         |
| YFT       | EPO   | L3    | 3        | AB       | <i>Thunnus albacares</i>                                                     | 99.15%       | MG017682.1                         |
| YFT       | EPO   | L4B   | 3        | B        | <i>Thunnus albacares</i>                                                     | 97.25%       | MG017683.1                         |
| YFT       | EPO   | L4O   | 3        | B        | <i>Thunnus albacares</i>                                                     | 98.17%       | MG017683.1                         |
| YFT       | IO    | L1    | 1        | AB       | <i>Thunnus albacares</i>                                                     | 99.58%       | MG017682.1                         |
| YFT       | IO    | L2    | 1        | AB       | <i>Thunnus albacares</i>                                                     | 99.58%       | MG017682.1                         |
| YFT       | IO    | L3    | 1        | AB       | <i>Thunnus albacares</i>                                                     | 99.58%       | MG017682.1                         |
| YFT       | IO    | L4B   | 1        | B        | <i>Thunnus albacares</i>                                                     | 99.08%       | MG017683.1                         |
| YFT       | IO    | L4O   | 1        | B        | <i>Katsuwonus pelamis</i>                                                    | 98.17%       | KP669172.1                         |
| YFT       | IO    | L1    | 2        | AB       | <i>Thunnus albacares</i>                                                     | 99.58%       | MG017682.1                         |
| YFT       | IO    | L2    | 2        | AB       | <i>Thunnus albacares</i>                                                     | 99.58%       | MG017682.1                         |
| YFT       | IO    | L3    | 2        | AB       | <i>Thunnus albacares</i>                                                     | 99.58%       | MG017682.1                         |
| YFT       | IO    | L4B   | 2        | B        | <i>Thunnus albacares</i> , <i>T.obesus</i>                                   | 97.25%       | MG017683.1, MG017696.1             |
| YFT       | IO    | L4O   | 2        | B        | <i>Thunnus albacares</i>                                                     | 99.08%       | MG017683.1                         |
| YFT       | IO    | L1    | 3        | AB       | <i>Thunnus albacares</i>                                                     | 99.58%       | MG017682.1                         |
| YFT       | IO    | L2    | 3        | AB       | <i>Thunnus albacares</i>                                                     | 99.58%       | MG017682.1                         |
| YFT       | IO    | L3    | 3        | AB       | <i>Thunnus albacares</i>                                                     | 99.58%       | MG017682.1                         |
| YFT       | IO    | L4B   | 3        | B        | <i>Katsuwonus pelamis</i>                                                    | 99.08%       | KP669172.1                         |
| YFT       | IO    | L4O   | 3        | B        | <i>Thunnus albacares</i>                                                     | 99.08%       | MG017686.1                         |

# Supplementary Material

| Morph. ID | Ocean | Level | Specimen | Fragment | Blast ID                           | % Similarity | Accession number       |
|-----------|-------|-------|----------|----------|------------------------------------|--------------|------------------------|
| YFT       | WCPO  | L1    | 1        | AB       | <i>Thunnus albacares</i>           | 99.58%       | MG017682.1             |
| YFT       | WCPO  | L2    | 1        | AB       | <i>Thunnus albacares</i>           | 99.58%       | MG017682.1             |
| YFT       | WCPO  | L3    | 1        | AB       | <i>Thunnus albacares</i>           | 99.58%       | MG017682.1             |
| YFT       | WCPO  | L4B   | 1        | B        | <i>Katsuwonus pelamis</i>          | 99.08%       | KP669132.1             |
| YFT       | WCPO  | L4O   | 1        | B        | <i>Thunnus albacares</i>           | 99.08%       | MG017683.1             |
| YFT       | WCPO  | L1    | 2        | AB       | <i>Thunnus albacares</i>           | 99.58%       | MG017682.1             |
| YFT       | WCPO  | L2    | 2        | AB       | <i>Thunnus albacares</i>           | 99.58%       | MG017682.1             |
| YFT       | WCPO  | L3    | 2        | AB       | <i>Thunnus albacares</i>           | 99.58%       | MG017682.1             |
| YFT       | WCPO  | L4B   | 2        | B        | <i>Thunnus albacares</i>           | 99.08%       | MG017683.1             |
| YFT       | WCPO  | L4O   | 2        | B        | <i>Thunnus albacares</i>           | 99.08%       | MG017683.1             |
| YFT       | WCPO  | L1    | 3        | AB       | <i>Thunnus albacares</i>           | 99.58%       | MG017682.1             |
| YFT       | WCPO  | L2    | 3        | AB       | <i>Thunnus albacares</i>           | 99.58%       | MG017682.1             |
| YFT       | WCPO  | L3    | 3        | AB       | <i>Thunnus albacares</i>           | 99.58%       | MG017682.1             |
| YFT       | WCPO  | L4B   | 3        | B        | <i>Thunnus albacares, T.obesus</i> | 97.25%       | MG017683.1, KJ018958.1 |
| YFT       | WCPO  | L4O   | 3        | B        | <i>Thunnus albacares</i>           | 99.08%       | MG017686.1             |
| BET       | EPO   | L1    | 1        | AB       | <i>Thunnus obesus</i>              | 99.15%       | MG017695.1             |
| BET       | EPO   | L2    | 1        | AB       | <i>Thunnus obesus</i>              | 99.15%       | MG017695.1             |
| BET       | EPO   | L3    | 1        | A        | <i>Thunnus obesus</i>              | 99.14%       | MG017697.1             |
| BET       | EPO   | L4B   | 1        | B        | <i>Thunnus obesus</i>              | 98.17%       | MG017696.1             |
| BET       | EPO   | L4O   | 1        | B        | <i>Thunnus obesus</i>              | 98.17%       | MG017697.1             |
| BET       | EPO   | L1    | 2        | AB       | <i>Thunnus obesus</i>              | 99.15%       | MG017695.1             |
| BET       | EPO   | L2    | 2        | AB       | <i>Thunnus obesus</i>              | 99.15%       | MG017695.1             |
| BET       | EPO   | L3    | 2        | A        | <i>Thunnus obesus</i>              | 99.14%       | MG017697.1             |
| BET       | EPO   | L4B   | 2        | B        | <i>Thunnus obesus</i>              | 98.17%       | MG017697.1             |
| BET       | EPO   | L4O   | 2        | B        | <i>Thunnus obesus</i>              | 98.17%       | MG017696.1             |
| BET       | EPO   | L1    | 3        | AB       | <i>Thunnus obesus</i>              | 99.15%       | MG017695.1             |
| BET       | EPO   | L2    | 3        | AB       | <i>Thunnus obesus</i>              | 99.15%       | MG017695.1             |
| BET       | EPO   | L3    | 3        | A        | <i>Thunnus obesus</i>              | 98.28%       | MG017697.1             |
| BET       | EPO   | L4B   | 3        | B        | <i>Katsuwonus pelamis</i>          | 100.00%      | AB098093.1             |
| BET       | EPO   | L4O   | 3        | B        | <i>Thunnus obesus</i>              | 98.17%       | MG017696.1             |
| BET       | IO    | L1    | 1        | AB       | <i>Thunnus obesus</i>              | 99.15%       | MG017695.1             |
| BET       | IO    | L2    | 1        | AB       | <i>Thunnus obesus</i>              | 99.15%       | MG017695.1             |
| BET       | IO    | L3    | 1        | A        | <i>Thunnus obesus</i>              | 99.15%       | MG017697.1             |
| BET       | IO    | L4B   | 1        | B        | <i>Thunnus obesus</i>              | 98.17%       | MG017696.1             |
| BET       | IO    | L4O   | 1        | B        | <i>Thunnus obesus</i>              | 98.17%       | MG017696.1             |
| BET       | IO    | L1    | 2        | AB       | <i>Thunnus obesus</i>              | 99.15%       | MG017695.1             |
| BET       | IO    | L2    | 2        | AB       | <i>Thunnus obesus</i>              | 99.15%       | MG017697.1             |
| BET       | IO    | L3    | 2        | A        | <i>Thunnus obesus</i>              | 99.15%       | MG017697.1             |
| BET       | IO    | L4B   | 2        | B        | <i>Thunnus obesus</i>              | 98.17%       | MG017696.1             |
| BET       | IO    | L4O   | 2        | B        | <i>Thunnus obesus</i>              | 98.17%       | MG017696.1             |
| BET       | IO    | L1    | 3        | AB       | <i>Thunnus obesus</i>              | 98.73%       | MG017695.1             |
| BET       | IO    | L2    | 3        | AB       | <i>Thunnus obesus</i>              | 98.73%       | MG017695.1             |
| BET       | IO    | L3    | 3        | A        | <i>Thunnus obesus</i>              | 99.15%       | MG017697.1             |
| BET       | IO    | L4B   | 3        | B        | <i>Thunnus obesus</i>              | 98.17%       | MG017696.1             |
| BET       | IO    | L4O   | 3        | B        | <i>Thunnus obesus</i>              | 98.17%       | MG017696.1             |
| SKJ       | AO    | L1    | 1        | AB       | <i>Katsuwonus pelamis</i>          | 99.58%       | KP669170.1             |
| SKJ       | AO    | L2    | 1        | AB       | <i>Katsuwonus pelamis</i>          | 99.58%       | KP669170.1             |
| SKJ       | AO    | L3    | 1        | AB       | <i>Katsuwonus pelamis</i>          | 99.58%       | KP669170.1             |
| SKJ       | AO    | L4B   | 1        | B        | <i>Thunnus obesus</i>              | 98.17%       | MG017696.1             |
| SKJ       | AO    | L4O   | 1        | A        | <i>Katsuwonus pelamis</i>          | 100.00%      | KJ617313.1             |
| SKJ       | AO    | L1    | 2        | AB       | <i>Katsuwonus pelamis</i>          | 99.58%       | KP669130.1             |
| SKJ       | AO    | L2    | 2        | AB       | <i>Katsuwonus pelamis</i>          | 99.15%       | KP669130.1             |
| SKJ       | AO    | L3    | 2        | AB       | <i>Katsuwonus pelamis</i>          | 99.58%       | KP669130.1             |
| SKJ       | AO    | L4B   | 2        | B        | <i>Thunnus obesus</i>              | 98.17%       | MG017696.1             |
| SKJ       | AO    | L4O   | 2        | B        | <i>Katsuwonus pelamis</i>          | 97.25%       | KP669132.1             |

# Supplementary Material

| Morph. ID | Ocean | Level | Specimen | Fragment | Blast ID                  | % Similarity | Accession number |
|-----------|-------|-------|----------|----------|---------------------------|--------------|------------------|
| SKJ       | AO    | L1    | 3        | AB       | <i>Katsuwonus pelamis</i> | 99.58%       | KP669170.1       |
| SKJ       | AO    | L2    | 3        | AB       | <i>Katsuwonus pelamis</i> | 99.58%       | KP669170.1       |
| SKJ       | AO    | L3    | 3        | -        | -                         | -            | -                |
| SKJ       | AO    | L4B   | 3        | B        | <i>Katsuwonus pelamis</i> | 100.00%      | KP669132.1       |
| SKJ       | AO    | L4O   | 3        | B        | <i>Katsuwonus pelamis</i> | 100.00%      | AB098093.1       |
| SKJ       | EPO   | L1    | 1        | AB       | <i>Katsuwonus pelamis</i> | 100.00%      | KJ617298.1       |
| SKJ       | EPO   | L2    | 1        | AB       | <i>Katsuwonus pelamis</i> | 100.00%      | KJ617298.1       |
| SKJ       | EPO   | L3    | 1        | AB       | <i>Katsuwonus pelamis</i> | 99.58%       | KP669170.1       |
| SKJ       | EPO   | L4B   | 1        | B        | <i>Thunnus obesus</i>     | 98.17%       | MG017696.1       |
| SKJ       | EPO   | L4O   | 1        | B        | <i>Thunnus obesus</i>     | 98.17%       | MG017696.1       |
| SKJ       | EPO   | L1    | 2        | AB       | <i>Katsuwonus pelamis</i> | 98.31%       | KP669130.1       |
| SKJ       | EPO   | L2    | 2        | AB       | <i>Katsuwonus pelamis</i> | 98.31%       | KP669130.1       |
| SKJ       | EPO   | L3    | 2        | AB       | <i>Katsuwonus pelamis</i> | 96.19%       | KP669130.1       |
| SKJ       | EPO   | L4B   | 2        | B        | <i>Thunnus obesus</i>     | 98.17%       | MG017696.1       |
| SKJ       | EPO   | L4O   | 2        | B        | <i>Thunnus obesus</i>     | 98.17%       | MG017696.1       |
| SKJ       | EPO   | L1    | 3        | AB       | <i>Katsuwonus pelamis</i> | 99.15%       | KP669172.1       |
| SKJ       | EPO   | L2    | 3        | AB       | <i>Katsuwonus pelamis</i> | 99.15%       | KP669172.1       |
| SKJ       | EPO   | L3    | 3        | AB       | <i>Katsuwonus pelamis</i> | 100.00%      | KJ617298.1       |
| SKJ       | EPO   | L4B   | 3        | B        | <i>Katsuwonus pelamis</i> | 100.00%      | KP669132.1       |
| SKJ       | EPO   | L4O   | 3        | B        | <i>Katsuwonus pelamis</i> | 100.00%      | KP669132.1       |
| SKJ       | IO    | L1    | 1        | AB       | <i>Katsuwonus pelamis</i> | 100.00%      | AB098093.1       |
| SKJ       | IO    | L2    | 1        | AB       | <i>Katsuwonus pelamis</i> | 100.00%      | AB098093.1       |
| SKJ       | IO    | L3    | 1        | AB       | <i>Katsuwonus pelamis</i> | 100.00%      | AB098093.1       |
| SKJ       | IO    | L4B   | 1        | B        | <i>Katsuwonus pelamis</i> | 97.25%       | KP669132.1       |
| SKJ       | IO    | L4O   | 1        | B        | <i>Thunnus obesus</i>     | 98.17%       | MG017696.1       |
| SKJ       | IO    | L1    | 2        | AB       | <i>Katsuwonus pelamis</i> | 99.15%       | KP669170.1       |
| SKJ       | IO    | L2    | 2        | AB       | <i>Katsuwonus pelamis</i> | 99.58%       | KP669170.1       |
| SKJ       | IO    | L3    | 2        | AB       | <i>Katsuwonus pelamis</i> | 99.58%       | KP669170.1       |
| SKJ       | IO    | L4B   | 2        | -        | -                         | -            | -                |
| SKJ       | IO    | L4O   | 2        | B        | <i>Thunnus obesus</i>     | 98.17%       | MG017696.1       |
| SKJ       | IO    | L1    | 3        | AB       | <i>Katsuwonus pelamis</i> | 100.00%      | AB098093.1       |
| SKJ       | IO    | L2    | 3        | AB       | <i>Katsuwonus pelamis</i> | 100.00%      | AB098093.1       |
| SKJ       | IO    | L3    | 3        | AB       | <i>Katsuwonus pelamis</i> | 100.00%      | AB098093.1       |
| SKJ       | IO    | L4B   | 3        | B        | <i>Katsuwonus pelamis</i> | 100.00%      | KP669132.1       |
| SKJ       | IO    | L4O   | 3        | B        | <i>Katsuwonus pelamis</i> | 100.00%      | KP669132.1       |
| SKJ       | WCPO  | L1    | 1        | AB       | <i>Katsuwonus pelamis</i> | 99.58%       | KP669170.1       |
| SKJ       | WCPO  | L2    | 1        | AB       | <i>Katsuwonus pelamis</i> | 99.58%       | KP669170.1       |
| SKJ       | WCPO  | L3    | 1        | AB       | <i>Katsuwonus pelamis</i> | 99.58%       | KP669130.1       |
| SKJ       | WCPO  | L4B   | 1        | B        | <i>Thunnus obesus</i>     | 98.17%       | MG017696.1       |
| SKJ       | WCPO  | L4O   | 1        | B        | <i>Thunnus obesus</i>     | 98.17%       | MG017696.1       |
| SKJ       | WCPO  | L1    | 2        | AB       | <i>Katsuwonus pelamis</i> | 99.15%       | KP669130.1       |
| SKJ       | WCPO  | L2    | 2        | AB       | <i>Katsuwonus pelamis</i> | 99.58%       | KP669130.1       |
| SKJ       | WCPO  | L3    | 2        | AB       | <i>Katsuwonus pelamis</i> | 99.58%       | KP669130.1       |
| SKJ       | WCPO  | L4B   | 2        | B        | <i>Thunnus obesus</i>     | 98.17%       | MG017696.1       |
| SKJ       | WCPO  | L4O   | 2        | B        | <i>Katsuwonus pelamis</i> | 100.00%      | KP669132.1       |
| SKJ       | WCPO  | L1    | 3        | AB       | <i>Katsuwonus pelamis</i> | 99.58%       | KP669170.1       |
| SKJ       | WCPO  | L2    | 3        | AB       | <i>Katsuwonus pelamis</i> | 99.58%       | KP669170.1       |
| SKJ       | WCPO  | L3    | 3        | AB       | <i>Katsuwonus pelamis</i> | 99.15%       | AB098096.1       |
| SKJ       | WCPO  | L4B   | 3        | B        | <i>Katsuwonus pelamis</i> | 99.08%       | KP669132.1       |
| SKJ       | WCPO  | L4O   | 3        | B        | <i>Katsuwonus pelamis</i> | 100.00%      | KP669132.1       |

# Supplementary Material

| Morph. ID | Ocean | Level | Specimen | Fragment | Blast ID                                   | % Similarity | Accession number       |
|-----------|-------|-------|----------|----------|--------------------------------------------|--------------|------------------------|
| LOT       | IO    | L1    | 1        | AB       | <i>Thunnus tonggol, thunnus atlanticus</i> | 98.73%       | KM055411.1, MG017704.1 |
| LOT       | IO    | L2    | 1        | AB       | <i>Thunnus tonggol, thunnus atlanticus</i> | 98.73%       | KM055411.1, MG017704.1 |
| LOT       | IO    | L3    | 1        | A        | <i>Thunnus tonggol</i>                     | 98.29%       | KF777796.1             |
| LOT       | IO    | L4B   | 1        | B        | <i>Thunnus obesus</i>                      | 98.17%       | MG017696.1             |
| LOT       | IO    | L4O   | 1        | B        | <i>Thunnus obesus</i>                      | 98.17%       | MG017696.1             |
| LOT       | IO    | L1    | 2        | AB       | <i>Thunnus tonggol</i>                     | 98.73%       | KM055411.1             |
| LOT       | IO    | L2    | 2        | AB       | <i>Thunnus tonggol</i>                     | 98.73%       | KM055411.1             |
| LOT       | IO    | L3    | 2        | AB       | <i>Thunnus thynnus, Thunnus albacares</i>  | 98.73%       | MG017705.1, MG017687.1 |
| LOT       | IO    | L4B   | 2        | B        | <i>Thunnus obesus</i>                      | 98.17%       | MG017696.1             |
| LOT       | IO    | L4O   | 2        | B        | <i>Thunnus tonggol, Thunnus thynnus</i>    | 99.08%       | MG017702.1, MG017705.1 |
| LOT       | IO    | L1    | 3        | AB       | <i>Thunnus tonggol, thunnus atlanticus</i> | 98.31%       | KM055411.1, MG017704.1 |
| LOT       | IO    | L2    | 3        | AB       | <i>Thunnus thynnus, Thunnus albacares</i>  | 98.73%       | MG017705.1, MG017687.1 |
| LOT       | IO    | L3    | 3        | AB       | <i>Thunnus thynnus, Thunnus albacares</i>  | 98.73%       | MG017705.1, MG017687.1 |
| LOT       | IO    | L4B   | 3        | B        | <i>Thunnus tonggol, Thunnus thynnus</i>    | 99.08%       | MG017702.1, MG017705.1 |
| LOT       | IO    | L4O   | 3        | B        | <i>Thunnus tonggol, Thunnus thynnus</i>    | 99.08%       | MG017702.1, MG017705.1 |
