# Supplementary material for: Canning Processes Reduce the DNA-Based Traceability of Commercial Tropical Tunas
Source: MDPI journal article supplement (doi:10.3390/foods9101372), 2020-09-27
Supplement: s1 [file s1]

# Supplementary Material

Pecoraro et al. Canning processes reduce DNA-based traceability of commercial tropical tunas

Table S2: Nucleotide substitution within the Cyt b sequences of the four target species (YFT, yellowfin tuna, *Thunnus albacares*; BET, bigeye tuna, *Thunnus obesus*; SKJ, skipjack tuna, *Katsuwonus pelamis*; LOT, longtail tuna, *Thunnus tonggol*) aligned against to the sequence of the mitochondrial genome of *Thunnus thynnus* (NCBI: NC\_004901, positions 14665 – 14901, 236 bp). Sequences from other levels (L2-L4) were compared with the reference level (L1). Nucleotide substitution was calculated for each specimen as a percentage of the variable positions.

|                            | 2 | 6 | 9 | 18 | 21 | 30 | 33 | 36 | 39 | 45 | 63 | 69 | 72 | 75 | 84 | 93 | 96 | 102 | 105 | 111 | 120 | 123 | 129 | 132 | 144 | 156 | 162 | 174 | 180 | 183 | 192 | 198 | 213 | 219 | 222 | 231 |
|----------------------------|---|---|---|----|----|----|----|----|----|----|----|----|----|----|----|----|----|-----|-----|-----|-----|-----|-----|-----|-----|-----|-----|-----|-----|-----|-----|-----|-----|-----|-----|-----|
| NC 004901 <i>T.thynnus</i> | T | C | C | A  | T  | C  | T  | C  | A  | A  | A  | A  | C  | G  | T  | C  | C  | T   | C   | C   | A   | A   | G   | T   | T   | T   | C   | C   | T   | C   | T   | T   | A   | T   | A   | T   |
| YFT-AO-L1-1                | . | . | . | .  | .  | .  | .  | .  | .  | G  | .  | .  | .  | A  | .  | .  | .  | .   | .   | .   | .   | .   | .   | .   | .   | .   | T   | .   | .   | T   | .   | .   | .   | C   | .   | C   |
| YFT-AO-L2-1                | . | . | . | .  | .  | .  | .  | .  | .  | G  | .  | .  | .  | A  | .  | .  | .  | .   | .   | .   | .   | .   | .   | .   | .   | .   | T   | .   | .   | T   | .   | .   | .   | C   | .   | C   |
| YFT-AO-L3-1                | . | . | . | .  | .  | .  | .  | .  | .  | G  | .  | .  | A  | A  | .  | .  | .  | .   | .   | .   | .   | .   | .   | .   | .   | .   | T   | .   | .   | T   | .   | .   | .   | C   | .   | C   |
| YFT-AO-L40-1               | - | - | - | -  | -  | -  | -  | -  | -  | -  | -  | -  | -  | -  | -  | -  | -  | -   | -   | -   | -   | -   | -   | -   | -   | -   | T   | .   | .   | C   | .   | .   | C   | .   | C   |     |
| YFT-AO-L4B-1               | - | - | - | -  | -  | -  | -  | -  | -  | -  | -  | -  | -  | -  | -  | -  | -  | -   | -   | -   | -   | -   | -   | A   | .   | C   | T   | A   | C   | A   | C   | C   | .   | C   | .   | C   |
| YFT-AO-L1-2                | . | . | . | .  | .  | .  | .  | .  | .  | G  | .  | .  | .  | A  | .  | .  | .  | .   | .   | .   | .   | .   | .   | .   | .   | .   | T   | .   | .   | T   | .   | .   | .   | C   | .   | C   |
| YFT-AO-L2-2                | . | . | . | .  | .  | .  | .  | .  | .  | G  | .  | .  | .  | A  | .  | .  | .  | .   | .   | .   | .   | .   | .   | .   | .   | .   | T   | .   | .   | T   | .   | .   | .   | C   | .   | C   |
| YFT-AO-L3-2                | . | . | . | .  | .  | .  | .  | .  | .  | G  | .  | .  | .  | A  | .  | .  | .  | .   | .   | .   | .   | .   | .   | .   | .   | .   | T   | .   | .   | T   | .   | .   | .   | C   | .   | C   |
| YFT-AO-L40-2               | - | - | - | -  | -  | -  | -  | -  | -  | -  | -  | -  | -  | -  | -  | -  | -  | -   | -   | -   | -   | -   | -   | A   | .   | C   | T   | A   | C   | A   | C   | C   | .   | C   | .   | C   |
| YFT-AO-L4B-2               | - | - | - | -  | -  | -  | -  | -  | -  | -  | -  | -  | -  | -  | -  | -  | -  | -   | -   | -   | -   | -   | -   | A   | .   | C   | T   | A   | C   | A   | C   | C   | .   | C   | .   | C   |
| YFT-AO-L1-3                | . | . | . | .  | .  | .  | .  | .  | .  | G  | .  | .  | A  | A  | .  | .  | .  | C   | .   | .   | .   | .   | .   | .   | .   | .   | T   | .   | .   | T   | .   | .   | .   | C   | .   | C   |
| YFT-AO-L2-3                | . | . | . | .  | .  | .  | A  | .  | .  | .  | .  | .  | A  | A  | .  | .  | .  | C   | .   | .   | .   | .   | .   | .   | .   | .   | T   | .   | .   | T   | .   | .   | .   | C   | .   | C   |
| YFT-AO-L3-3                | - | - | - | -  | -  | -  | -  | -  | -  | -  | -  | -  | -  | -  | -  | -  | -  | -   | -   | -   | -   | -   | -   | -   | -   | -   | -   | -   | -   | -   | -   | -   | -   | -   | -   |     |
| YFT-AO-L40-3               | - | - | - | -  | -  | -  | -  | -  | -  | -  | -  | -  | -  | -  | -  | -  | -  | -   | -   | -   | -   | -   | -   | -   | -   | -   | T   | .   | .   | T   | .   | .   | .   | .   | .   | C   |
| YFT-AO-L4B-3               | - | - | - | -  | -  | -  | -  | -  | -  | -  | -  | -  | -  | -  | -  | -  | -  | -   | -   | -   | -   | -   | -   | A   | .   | C   | T   | A   | C   | A   | C   | C   | .   | C   | .   | C   |
| YFT-IO-L1-1                | . | . | . | .  | .  | .  | .  | .  | .  | G  | .  | .  | .  | A  | .  | .  | .  | .   | .   | .   | .   | .   | .   | .   | .   | .   | T   | .   | .   | T   | .   | .   | .   | C   | .   | C   |
| YFT-IO-L2-1                | . | . | . | .  | .  | .  | .  | .  | .  | G  | .  | .  | .  | A  | .  | .  | .  | .   | .   | .   | .   | .   | .   | .   | .   | .   | T   | .   | .   | T   | .   | .   | .   | C   | .   | C   |
| YFT-IO-L3-1                | . | . | . | .  | .  | .  | .  | .  | .  | G  | .  | .  | .  | A  | .  | .  | .  | .   | .   | .   | .   | .   | .   | .   | .   | .   | T   | .   | .   | T   | .   | .   | .   | C   | .   | C   |
| YFT-IO-L40-1               | - | - | - | -  | -  | -  | -  | -  | -  | -  | -  | -  | -  | -  | -  | -  | -  | -   | -   | -   | -   | -   | -   | A   | .   | C   | T   | A   | .   | T   | C   | C   | .   | .   | C   |     |
| YFT-IO-L4B-1               | - | - | - | -  | -  | -  | -  | -  | -  | -  | -  | -  | -  | -  | -  | -  | -  | -   | -   | -   | -   | -   | -   | -   | -   | -   | T   | .   | .   | T   | .   | .   | .   | C   | .   | C   |
| YFT-IO-L1-2                | . | . | . | .  | .  | .  | .  | .  | .  | G  | .  | .  | .  | A  | .  | .  | .  | .   | .   | .   | .   | .   | .   | .   | .   | .   | T   | .   | .   | T   | .   | .   | .   | C   | .   | C   |
| YFT-IO-L2-2                | . | . | . | .  | .  | .  | .  | .  | .  | G  | .  | .  | .  | A  | .  | .  | .  | .   | .   | .   | .   | .   | .   | .   | .   | .   | T   | .   | .   | T   | .   | .   | .   | C   | .   | C   |
| YFT-IO-L3-2                | . | . | . | .  | .  | .  | .  | .  | .  | G  | .  | .  | .  | A  | .  | .  | .  | .   | .   | .   | .   | .   | .   | .   | .   | .   | T   | .   | .   | T   | .   | .   | .   | C   | .   | C   |
| YFT-IO-L40-2               | - | - | - | -  | -  | -  | -  | -  | -  | -  | -  | -  | -  | -  | -  | -  | -  | -   | -   | -   | -   | -   | -   | -   | -   | -   | T   | .   | .   | T   | .   | .   | .   | C   | .   | C   |
| YFT-IO-L4B-2               | - | - | - | -  | -  | -  | -  | -  | -  | -  | -  | -  | -  | -  | -  | -  | -  | -   | -   | -   | -   | -   | -   | -   | -   | -   | T   | .   | .   | A   | C   | .   | .   | C   | .   | C   |
| YFT-IO-L1-3                | . | . | . | .  | .  | .  | .  | .  | .  | G  | .  | .  | .  | A  | .  | .  | .  | .   | .   | .   | .   | .   | .   | .   | .   | .   | T   | .   | .   | T   | .   | .   | .   | C   | .   | C   |
| YFT-IO-L2-3                | . | . | . | .  | .  | .  | .  | .  | .  | G  | .  | .  | .  | A  | .  | .  | .  | .   | .   | .   | .   | .   | .   | .   | .   | .   | T   | .   | .   | T   | .   | .   | .   | C   | .   | C   |
| YFT-IO-L3-3                | . | . | . | .  | .  | .  | .  | .  | .  | G  | .  | .  | .  | A  | .  | .  | .  | .   | .   | .   | .   | .   | .   | .   | .   | .   | T   | .   | .   | T   | .   | .   | .   | C   | .   | C   |
| YFT-IO-L40-3               | - | - | - | -  | -  | -  | -  | -  | -  | -  | -  | -  | -  | -  | -  | -  | -  | -   | -   | -   | -   | -   | -   | -   | -   | -   | T   | .   | .   | T   | .   | .   | .   | .   | .   | C   |
| YFT-IO-L4B-3               | - | - | - | -  | -  | -  | -  | -  | -  | -  | -  | -  | -  | -  | -  | -  | -  | -   | -   | -   | -   | -   | -   | A   | .   | C   | T   | A   | .   | A   | C   | C   | .   | .   | .   | C   |

# Supplementary Material

|                            | 2 | 6 | 9 | 18 | 21 | 30 | 33 | 36 | 39 | 45 | 63 | 69 | 72 | 75 | 84 | 93 | 96 | 102 | 105 | 111 | 120 | 123 | 129 | 132 | 144 | 156 | 162 | 174 | 180 | 183 | 192 | 198 | 213 | 219 | 222 | 231 |   |
|----------------------------|---|---|---|----|----|----|----|----|----|----|----|----|----|----|----|----|----|-----|-----|-----|-----|-----|-----|-----|-----|-----|-----|-----|-----|-----|-----|-----|-----|-----|-----|-----|---|
| NC 004901 <i>T.thynnus</i> | T | C | C | A  | T  | C  | T  | C  | A  | A  | A  | A  | C  | G  | T  | C  | C  | T   | C   | C   | A   | A   | G   | T   | T   | T   | C   | C   | T   | C   | T   | T   | A   | T   | A   | T   |   |
| YFT-WCPO-L1-1              | . | . | . | .  | .  | .  | .  | .  | .  | G  | .  | .  | .  | A  | .  | .  | .  | .   | .   | .   | .   | .   | .   | .   | .   | .   | T   | .   | .   | T   | .   | .   | .   | C   | .   | C   |   |
| YFT-WCPO-L2-1              | . | . | . | .  | .  | .  | .  | .  | .  | G  | .  | .  | .  | A  | .  | .  | .  | .   | .   | .   | .   | .   | .   | .   | .   | .   | T   | .   | .   | T   | .   | .   | .   | C   | .   | C   |   |
| YFT-WCPO-L3-1              | . | . | . | .  | .  | .  | .  | .  | .  | G  | .  | .  | .  | A  | .  | .  | .  | .   | .   | .   | .   | .   | .   | .   | .   | .   | T   | .   | .   | T   | .   | .   | .   | C   | .   | C   |   |
| YFT-WCPO-L4O-1             | - | - | - | -  | -  | -  | -  | -  | -  | -  | -  | -  | -  | -  | -  | -  | -  | -   | -   | -   | -   | -   | -   | -   | -   | -   | T   | .   | .   | T   | .   | .   | .   | C   | .   | C   |   |
| YFT-WCPO-L4B-1             | - | - | - | -  | -  | -  | -  | -  | -  | -  | -  | -  | -  | -  | -  | -  | -  | -   | -   | -   | -   | -   | -   | A   | .   | C   | T   | A   | C   | .   | C   | C   | .   | C   | .   | C   |   |
| YFT-WCPO-L1-2              | . | . | . | .  | .  | .  | .  | .  | .  | G  | .  | .  | .  | A  | .  | .  | .  | .   | .   | .   | .   | .   | .   | .   | .   | .   | T   | .   | .   | T   | .   | .   | .   | C   | .   | C   |   |
| YFT-WCPO-L2-2              | . | . | . | .  | .  | .  | .  | .  | .  | G  | .  | .  | .  | A  | .  | .  | .  | .   | .   | .   | .   | .   | .   | .   | .   | .   | T   | .   | .   | T   | .   | .   | .   | C   | .   | C   |   |
| YFT-WCPO-L3-2              | . | . | . | .  | .  | .  | .  | .  | .  | G  | .  | .  | .  | A  | .  | .  | .  | .   | .   | .   | .   | .   | .   | .   | .   | .   | T   | .   | .   | T   | .   | .   | .   | C   | .   | C   |   |
| YFT-WCPO-L4O-2             | - | - | - | -  | -  | -  | -  | -  | -  | -  | -  | -  | -  | -  | -  | -  | -  | -   | -   | -   | -   | -   | -   | -   | -   | T   | .   | .   | T   | .   | .   | .   | C   | .   | C   |     |   |
| YFT-WCPO-L4B-2             | - | - | - | -  | -  | -  | -  | -  | -  | -  | -  | -  | -  | -  | -  | -  | -  | -   | -   | -   | -   | -   | -   | .   | .   | .   | T   | .   | .   | T   | .   | .   | .   | C   | .   | C   |   |
| YFT-WCPO-L1-3              | . | . | . | .  | .  | .  | .  | .  | .  | G  | .  | .  | .  | A  | .  | .  | .  | .   | .   | .   | .   | .   | .   | .   | .   | .   | T   | .   | .   | T   | .   | .   | .   | C   | .   | C   |   |
| YFT-WCPO-L2-3              | . | . | . | .  | .  | .  | .  | .  | .  | G  | .  | .  | .  | A  | .  | .  | .  | .   | .   | .   | .   | .   | .   | .   | .   | .   | T   | .   | .   | T   | .   | .   | .   | C   | .   | C   |   |
| YFT-WCPO-L3-3              | . | . | . | .  | .  | .  | .  | .  | .  | G  | .  | .  | .  | A  | .  | .  | .  | .   | .   | .   | .   | .   | .   | .   | .   | .   | T   | .   | .   | T   | .   | .   | .   | C   | .   | C   |   |
| YFT-WCPO-L4O-3             | - | - | - | -  | -  | -  | -  | -  | -  | -  | -  | -  | -  | -  | -  | -  | -  | -   | -   | -   | -   | -   | -   | -   | .   | .   | .   | T   | .   | .   | .   | .   | .   | C   |     |     |   |
| YFT-WCPO-L4B-3             | - | - | - | -  | -  | -  | -  | -  | -  | -  | -  | -  | -  | -  | -  | -  | -  | -   | -   | -   | -   | -   | -   | .   | .   | .   | T   | C   | .   | .   | .   | C   | T   | C   |     |     |   |
| YFT-EPO-L1-1               | . | . | . | .  | .  | .  | .  | .  | .  | G  | .  | .  | .  | A  | .  | .  | .  | .   | .   | .   | .   | .   | .   | .   | .   | C   | .   | T   | .   | .   | T   | .   | .   | .   | C   | .   | C |
| YFT-EPO-L2-1               | . | . | . | .  | .  | .  | .  | .  | .  | G  | .  | .  | .  | A  | .  | .  | .  | .   | .   | .   | .   | .   | .   | .   | .   | C   | .   | T   | .   | .   | T   | .   | .   | .   | C   | .   | C |
| YFT-EPO-L3-1               | . | . | . | .  | .  | .  | .  | .  | .  | G  | .  | .  | .  | A  | .  | .  | .  | .   | .   | .   | .   | .   | .   | .   | .   | C   | .   | T   | .   | .   | T   | .   | .   | .   | C   | .   | C |
| YFT-EPO-L4O-1              | - | - | - | -  | -  | -  | -  | -  | -  | -  | -  | -  | -  | -  | -  | -  | -  | -   | -   | -   | -   | -   | -   | .   | C   | .   | T   | .   | .   | T   | .   | .   | .   | C   | .   | C   |   |
| YFT-EPO-L4B-1              | - | - | - | -  | -  | -  | -  | -  | -  | -  | -  | -  | -  | -  | -  | -  | -  | -   | -   | -   | -   | -   | -   | A   | .   | C   | T   | A   | .   | T   | C   | .   | .   | C   | .   | C   |   |
| YFT-EPO-L1-2               | . | . | . | .  | .  | .  | .  | .  | .  | G  | .  | .  | .  | A  | .  | .  | .  | .   | .   | .   | .   | .   | .   | .   | .   | C   | .   | T   | .   | .   | T   | .   | .   | .   | C   | .   | C |
| YFT-EPO-L2-2               | . | . | . | .  | .  | .  | .  | .  | .  | G  | .  | .  | .  | A  | .  | .  | .  | .   | .   | .   | .   | .   | .   | .   | .   | C   | .   | T   | .   | .   | T   | .   | .   | .   | C   | .   | C |
| YFT-EPO-L3-2               | . | . | . | .  | .  | .  | .  | .  | .  | G  | .  | .  | .  | A  | .  | .  | .  | .   | .   | .   | .   | .   | .   | .   | .   | C   | .   | T   | .   | .   | T   | .   | .   | .   | C   | .   | C |
| YFT-EPO-L4O-2              | - | - | - | -  | -  | -  | -  | -  | -  | -  | -  | -  | -  | -  | -  | -  | -  | -   | -   | -   | -   | -   | -   | .   | C   | .   | T   | .   | .   | T   | .   | .   | .   | C   | .   | C   |   |
| YFT-EPO-L4B-2              | - | - | - | -  | -  | -  | -  | -  | -  | -  | -  | -  | -  | -  | -  | -  | -  | -   | -   | -   | -   | -   | -   | A   | .   | C   | T   | A   | C   | A   | .   | C   | .   | C   | .   | C   |   |
| YFT-EPO-L1-3               | . | . | . | .  | .  | .  | .  | .  | .  | G  | .  | .  | .  | A  | .  | .  | .  | .   | .   | .   | .   | .   | .   | .   | .   | C   | .   | T   | .   | .   | T   | .   | .   | .   | C   | .   | C |
| YFT-EPO-L2-3               | . | . | . | .  | .  | .  | .  | .  | .  | G  | .  | .  | .  | A  | .  | .  | .  | .   | .   | .   | .   | .   | .   | .   | .   | C   | .   | T   | .   | .   | T   | .   | .   | .   | C   | .   | C |
| YFT-EPO-L3-3               | . | . | . | .  | .  | .  | .  | .  | .  | G  | .  | .  | .  | A  | .  | .  | .  | .   | .   | .   | .   | .   | .   | .   | .   | C   | .   | T   | .   | .   | T   | .   | .   | .   | C   | .   | C |
| YFT-EPO-L4O-3              | - | - | - | -  | -  | -  | -  | -  | -  | -  | -  | -  | -  | -  | -  | -  | -  | -   | -   | -   | -   | -   | -   | .   | C   | .   | T   | .   | .   | T   | .   | .   | .   | C   | .   | C   |   |
| YFT-EPO-L4B-3              | - | - | - | -  | -  | -  | -  | -  | -  | -  | -  | -  | -  | -  | -  | -  | -  | -   | -   | -   | -   | -   | -   | .   | C   | .   | T   | C   | .   | .   | .   | C   | .   | C   | .   | C   |   |

# Supplementary Material

|                            |  | 2 | 6 | 9 | 18 | 21 | 30 | 33 | 36 | 39 | 45 | 57 | 63 | 69 | 72 | 75 | 84 | 93 | 96 | 102 | 105 | 111 | 117 | 120 | 123 | 129 | 132 | 144 | 156 | 162 | 174 | 180 | 183 | 192 | 198 | 213 | 219 |   |   |
|----------------------------|--|---|---|---|----|----|----|----|----|----|----|----|----|----|----|----|----|----|----|-----|-----|-----|-----|-----|-----|-----|-----|-----|-----|-----|-----|-----|-----|-----|-----|-----|-----|---|---|
| NC 004901 <i>T.thynnus</i> |  | T | C | C | A  | T  | C  | T  | C  | A  | A  | C  | A  | A  | C  | G  | T  | C  | C  | T   | C   | C   | C   | A   | A   | G   | T   | T   | T   | C   | C   | T   | C   | T   | T   | A   | T   |   |   |
| BET-IO-L1-1                |  | . | . | . | .  | .  | .  | .  | .  | .  | .  | .  | .  | .  | A  | A  | .  | .  | .  | C   | .   | .   | .   | .   | .   | .   | .   | .   | .   | T   | .   | .   | .   | C   | .   | .   | C   | C |   |
| BET-IO-L2-1                |  | . | . | . | .  | .  | .  | .  | .  | .  | .  | .  | .  | .  | A  | A  | .  | .  | .  | C   | .   | .   | .   | .   | .   | .   | .   | .   | .   | T   | .   | .   | .   | C   | .   | .   | C   | C |   |
| BET-IO-L3-1                |  | . | . | . | .  | .  | .  | .  | .  | .  | .  | .  | .  | .  | A  | A  | .  | .  | .  | C   | .   | A   | .   | .   | .   | .   | .   | .   | .   | T   | .   | .   | .   | C   | .   | .   | -   | - |   |
| BET-IO-L4O-1               |  | - | - | - | -  | -  | -  | -  | -  | -  | -  | -  | -  | -  | -  | -  | -  | -  | -  | -   | -   | -   | -   | -   | -   | -   | .   | .   | .   | .   | T   | .   | .   | .   | C   | .   | .   | C | C |
| BET-IO-L4B-1               |  | - | - | - | -  | -  | -  | -  | -  | -  | -  | -  | -  | -  | -  | -  | -  | -  | -  | -   | -   | -   | -   | -   | -   | .   | .   | .   | .   | T   | .   | .   | .   | C   | .   | .   | C   | C |   |
| BET-IO-L1-2                |  | . | . | . | .  | .  | .  | .  | .  | .  | .  | .  | .  | .  | A  | A  | .  | .  | .  | C   | .   | .   | .   | .   | .   | .   | .   | .   | .   | T   | .   | .   | .   | C   | .   | .   | C   | C |   |
| BET-IO-L2-2                |  | . | . | . | .  | .  | .  | .  | .  | .  | .  | .  | .  | .  | A  | A  | .  | .  | .  | C   | .   | .   | .   | .   | .   | .   | .   | .   | .   | T   | .   | C   | .   | C   | .   | .   | C   | C |   |
| BET-IO-L3-2                |  | . | . | . | .  | .  | .  | .  | .  | .  | .  | .  | .  | .  | A  | A  | .  | .  | .  | C   | .   | A   | .   | .   | .   | .   | .   | .   | .   | T   | .   | -   | -   | -   | -   | -   | -   | - |   |
| BET-IO-L4O-2               |  | - | - | - | -  | -  | -  | -  | -  | -  | -  | -  | -  | -  | -  | -  | -  | -  | -  | -   | -   | -   | -   | -   | -   | -   | .   | .   | .   | .   | T   | .   | .   | .   | C   | .   | .   | C | C |
| BET-IO-L4B-2               |  | - | - | - | -  | -  | -  | -  | -  | -  | -  | -  | -  | -  | -  | -  | -  | -  | -  | -   | -   | -   | -   | -   | -   | -   | .   | .   | .   | .   | T   | .   | .   | .   | C   | .   | .   | C | C |
| BET-IO-L1-3                |  | . | . | . | .  | .  | .  | .  | .  | .  | .  | T  | .  | .  | A  | A  | .  | .  | .  | C   | .   | .   | .   | .   | .   | .   | .   | .   | .   | T   | .   | .   | .   | C   | .   | .   | C   | C |   |
| BET-IO-L2-3                |  | . | . | . | .  | .  | .  | .  | .  | .  | .  | T  | .  | .  | A  | A  | .  | .  | .  | C   | .   | .   | .   | .   | .   | .   | .   | .   | .   | T   | .   | .   | .   | C   | .   | .   | C   | C |   |
| BET-IO-L3-3                |  | . | . | . | .  | .  | .  | .  | .  | .  | .  | .  | .  | .  | A  | A  | .  | .  | .  | C   | .   | A   | .   | .   | .   | .   | .   | .   | .   | T   | .   | -   | -   | -   | -   | -   | -   | - |   |
| BET-IO-L4O-3               |  | - | - | - | -  | -  | -  | -  | -  | -  | -  | -  | -  | -  | -  | -  | -  | -  | -  | -   | -   | -   | -   | -   | -   | -   | .   | .   | .   | .   | T   | .   | .   | .   | C   | .   | .   | C | C |
| BET-IO-L4B-3               |  | - | - | - | -  | -  | -  | -  | -  | -  | -  | -  | -  | -  | -  | -  | -  | -  | -  | -   | -   | -   | -   | -   | -   | -   | .   | .   | .   | .   | T   | .   | .   | .   | C   | .   | .   | C | C |
| BET-EPO-L1-1               |  | . | . | . | .  | .  | .  | .  | .  | .  | .  | .  | .  | .  | A  | A  | .  | .  | .  | C   | .   | .   | .   | .   | .   | .   | .   | .   | .   | T   | .   | .   | .   | C   | .   | .   | C   | C |   |
| BET-EPO-L2-1               |  | . | . | . | .  | .  | .  | .  | .  | .  | .  | .  | .  | .  | A  | A  | .  | .  | .  | C   | .   | .   | .   | .   | .   | .   | .   | .   | .   | T   | .   | .   | .   | C   | .   | .   | C   | C |   |
| BET-EPO-L3-1               |  | . | . | . | .  | .  | .  | .  | .  | .  | .  | .  | .  | .  | A  | A  | .  | .  | .  | C   | .   | A   | A   | .   | .   | .   | .   | .   | .   | T   | .   | -   | -   | -   | -   | -   | -   | - |   |
| BET-EPO-L4O-1              |  | - | - | - | -  | -  | -  | -  | -  | -  | -  | -  | -  | -  | -  | -  | -  | -  | -  | -   | -   | -   | -   | -   | -   | -   | .   | .   | .   | .   | T   | .   | C   | .   | C   | .   | .   | C | C |
| BET-EPO-L4B-1              |  | - | - | - | -  | -  | -  | -  | -  | -  | -  | -  | -  | -  | -  | -  | -  | -  | -  | -   | -   | -   | -   | -   | -   | -   | .   | .   | .   | .   | T   | .   | .   | .   | C   | .   | .   | C | C |
| BET-EPO-L1-2               |  | . | . | . | .  | .  | .  | .  | .  | .  | .  | .  | .  | .  | A  | A  | .  | .  | .  | C   | .   | .   | .   | .   | .   | .   | .   | .   | .   | T   | .   | .   | .   | C   | .   | .   | C   | C |   |
| BET-EPO-L2-2               |  | . | . | . | .  | .  | .  | .  | .  | .  | .  | .  | .  | .  | A  | A  | .  | .  | .  | C   | .   | .   | .   | .   | .   | .   | .   | .   | .   | T   | .   | .   | .   | C   | .   | .   | C   | C |   |
| BET-EPO-L3-2               |  | . | . | . | .  | .  | .  | .  | .  | .  | .  | .  | .  | .  | A  | A  | .  | .  | .  | C   | .   | A   | A   | .   | -   | -   | -   | -   | .   | T   | .   | -   | -   | -   | -   | -   | -   | - |   |
| BET-EPO-L4O-2              |  | - | - | - | -  | -  | -  | -  | -  | -  | -  | -  | -  | -  | -  | -  | -  | -  | -  | -   | -   | -   | -   | -   | -   | -   | .   | .   | .   | .   | T   | .   | .   | .   | C   | .   | .   | C | C |
| BET-EPO-L4B-2              |  | - | - | - | -  | -  | -  | -  | -  | -  | -  | -  | -  | -  | -  | -  | -  | -  | -  | -   | -   | -   | -   | -   | -   | -   | .   | .   | .   | .   | T   | .   | C   | .   | C   | .   | .   | C | C |
| BET-EPO-L1-3               |  | . | . | . | .  | .  | .  | .  | .  | .  | .  | .  | .  | .  | A  | A  | .  | .  | .  | C   | .   | .   | .   | .   | .   | .   | .   | .   | .   | T   | .   | .   | .   | C   | .   | .   | C   | C |   |
| BET-EPO-L2-3               |  | . | . | . | .  | .  | .  | .  | .  | .  | .  | .  | .  | .  | A  | A  | .  | .  | .  | C   | .   | .   | .   | .   | .   | .   | .   | .   | .   | T   | .   | .   | .   | C   | .   | .   | C   | C |   |
| BET-EPO-L3-3               |  | . | . | . | .  | .  | .  | .  | .  | .  | .  | .  | .  | .  | A  | A  | .  | .  | .  | C   | .   | T   | A   | A   | .   | -   | -   | -   | -   | T   | .   | -   | -   | -   | -   | -   | -   | - |   |
| BET-EPO-L4O-3              |  | - | - | - | -  | -  | -  | -  | -  | -  | -  | -  | -  | -  | -  | -  | -  | -  | -  | -   | -   | -   | -   | -   | -   | -   | .   | .   | .   | .   | T   | .   | .   | .   | C   | .   | .   | C | C |
| BET-EPO-L4B-3              |  | - | - | - | -  | -  | -  | -  | -  | -  | -  | -  | -  | -  | -  | -  | -  | -  | -  | -   | -   | -   | -   | -   | -   | -   | .   | A   | .   | C   | T   | A   | C   | A   | C   | C   | G   | C | C |

## Supplementary Material

|                            |  | 2 | 6 | 9 | 18 | 21 | 30 | 33 | 36 | 39 | 45 | 63 | 69 | 72 | 75 | 84 | 90 | 93 | 96 | 102 | 105 | 108 | 109 | 111 | 120 | 123 | 129 | 132 | 144 | 151 | 156 | 162 | 174 | 180 | 183 | 192 | 198 | 213 | 219 | 231 |
|----------------------------|--|---|---|---|----|----|----|----|----|----|----|----|----|----|----|----|----|----|----|-----|-----|-----|-----|-----|-----|-----|-----|-----|-----|-----|-----|-----|-----|-----|-----|-----|-----|-----|-----|-----|
| NC 004901 <i>T.thynnus</i> |  | T | C | C | A  | T  | C  | T  | C  | A  | A  | A  | A  | C  | G  | T  | G  | C  | C  | T   | C   | C   | G   | C   | A   | A   | G   | T   | T   | A   | T   | C   | C   | T   | C   | T   | T   | A   | T   | T   |
| SKJ-AO-L1-1                |  | C | T | T | T  | C  | T  | C  | .  | C  | .  | T  | C  | A  | T  | A  | .  | T  | T  | C   | T   | .   | .   | A   | .   | .   | .   | A   | .   | .   | C   | T   | A   | C   | A   | C   | C   | G   | C   | C   |
| SKJ-AO-L2-1                |  | C | T | T | T  | C  | T  | C  | .  | C  | .  | T  | C  | A  | T  | A  | .  | T  | T  | C   | T   | .   | .   | A   | .   | .   | .   | A   | .   | .   | C   | T   | A   | C   | A   | C   | C   | G   | C   | C   |
| SKJ-AO-L3-1                |  | C | T | T | T  | C  | T  | C  | .  | C  | .  | T  | C  | A  | T  | A  | .  | T  | T  | C   | T   | C   | .   | .   | A   | .   | .   | A   | .   | .   | C   | T   | A   | C   | A   | C   | C   | G   | C   | C   |
| SKJ-AO-L4O-1               |  | C | T | T | T  | C  | T  | C  | .  | C  | .  | T  | C  | A  | T  | A  | A  | T  | T  | C   | .   | .   | .   | A   | .   | .   | .   | .   | .   | .   | .   | .   | .   | .   | .   | .   | .   | .   | .   | .   |
| SKJ-AO-L4B-1               |  | - | - | - | -  | -  | -  | -  | -  | -  | -  | -  | -  | -  | -  | -  | -  | -  | -  | -   | -   | -   | -   | -   | -   | -   | -   | -   | -   | -   | -   | -   | -   | -   | -   | -   | -   | -   |     |     |
| SKJ-AO-L1-2                |  | C | T | T | T  | C  | T  | C  | .  | C  | .  | T  | C  | A  | T  | A  | .  | T  | T  | C   | .   | .   | .   | A   | .   | .   | .   | A   | .   | .   | C   | T   | A   | C   | A   | C   | C   | .   | C   | C   |
| SKJ-AO-L2-2                |  | C | T | T | T  | C  | T  | C  | .  | C  | .  | T  | C  | A  | T  | A  | .  | T  | T  | C   | .   | .   | .   | A   | .   | .   | .   | A   | .   | .   | C   | T   | A   | C   | A   | C   | C   | .   | C   | C   |
| SKJ-AO-L3-2                |  | C | T | T | T  | C  | T  | C  | .  | C  | .  | T  | C  | A  | T  | A  | .  | T  | T  | C   | .   | .   | .   | A   | .   | .   | .   | A   | .   | .   | C   | T   | A   | C   | A   | C   | C   | .   | C   | C   |
| SKJ-AO-L4O-2               |  | - | - | - | -  | -  | -  | -  | -  | -  | -  | -  | -  | -  | -  | -  | -  | -  | -  | -   | -   | -   | -   | -   | -   | -   | -   | -   | -   | -   | -   | -   | -   | -   | -   | -   | -   | -   |     |     |
| SKJ-AO-L4B-2               |  | - | - | - | -  | -  | -  | -  | -  | -  | -  | -  | -  | -  | -  | -  | -  | -  | -  | -   | -   | -   | -   | -   | -   | -   | -   | -   | -   | -   | -   | -   | -   | -   | -   | -   | -   | -   |     |     |
| SKJ-AO-L1-3                |  | C | T | T | T  | C  | T  | C  | .  | C  | .  | T  | C  | A  | C  | A  | .  | T  | T  | C   | T   | .   | .   | A   | .   | .   | .   | A   | .   | .   | C   | T   | A   | C   | A   | C   | C   | G   | C   | C   |
| SKJ-AO-L2-3                |  | C | T | T | T  | C  | T  | C  | .  | C  | .  | T  | C  | A  | C  | A  | .  | T  | T  | C   | T   | .   | .   | A   | .   | .   | .   | A   | .   | .   | C   | T   | A   | C   | A   | C   | C   | G   | C   | C   |
| SKJ-AO-L3-3                |  | - | - | - | -  | -  | -  | -  | -  | -  | -  | -  | -  | -  | -  | -  | -  | -  | -  | -   | -   | -   | -   | -   | -   | -   | -   | -   | -   | -   | -   | -   | -   | -   | -   | -   | -   | -   |     |     |
| SKJ-AO-L4O-3               |  | - | - | - | -  | -  | -  | -  | -  | -  | -  | -  | -  | -  | -  | -  | -  | -  | -  | -   | -   | -   | -   | -   | -   | -   | -   | -   | -   | -   | -   | -   | -   | -   | -   | -   | -   | -   |     |     |
| SKJ-AO-L4B-3               |  | - | - | - | -  | -  | -  | -  | -  | -  | -  | -  | -  | -  | -  | -  | -  | -  | -  | -   | -   | -   | -   | -   | -   | -   | -   | -   | -   | -   | -   | -   | -   | -   | -   | -   | -   | -   |     |     |
| SKJ-IO-L1-1                |  | C | T | T | T  | C  | T  | C  | .  | C  | .  | T  | C  | A  | T  | A  | .  | T  | T  | C   | .   | .   | .   | A   | .   | G   | .   | A   | .   | .   | C   | T   | A   | C   | A   | C   | C   | G   | C   | C   |
| SKJ-IO-L2-1                |  | C | T | T | T  | C  | T  | C  | .  | C  | .  | T  | C  | A  | T  | A  | .  | T  | T  | C   | .   | .   | .   | A   | .   | G   | .   | A   | .   | .   | C   | T   | A   | C   | A   | C   | C   | G   | C   | C   |
| SKJ-IO-L3-1                |  | C | T | T | T  | C  | T  | C  | .  | C  | .  | T  | C  | A  | T  | A  | .  | T  | T  | C   | .   | .   | .   | A   | .   | G   | .   | A   | .   | .   | C   | T   | A   | C   | A   | C   | C   | G   | C   | C   |
| SKJ-IO-L4O-1               |  | - | - | - | -  | -  | -  | -  | -  | -  | -  | -  | -  | -  | -  | -  | -  | -  | -  | -   | -   | -   | -   | -   | -   | -   | -   | -   | -   | -   | -   | -   | -   | -   | -   | -   | -   | -   |     |     |
| SKJ-IO-L4B-1               |  | - | - | - | -  | -  | -  | -  | -  | -  | -  | -  | -  | -  | -  | -  | -  | -  | -  | -   | -   | -   | -   | -   | -   | -   | -   | -   | -   | -   | -   | -   | -   | -   | -   | -   | -   | -   |     |     |
| SKJ-IO-L1-2                |  | C | T | T | T  | C  | T  | C  | .  | C  | .  | T  | C  | A  | T  | A  | .  | T  | T  | C   | T   | .   | .   | A   | .   | .   | .   | A   | .   | .   | C   | T   | A   | C   | A   | C   | C   | G   | C   | C   |
| SKJ-IO-L2-2                |  | C | T | T | T  | C  | T  | C  | .  | C  | .  | T  | C  | A  | T  | A  | .  | T  | T  | C   | T   | .   | .   | A   | .   | .   | .   | A   | .   | .   | C   | T   | A   | C   | A   | C   | C   | G   | C   | C   |
| SKJ-IO-L3-2                |  | C | T | T | T  | C  | T  | C  | .  | C  | .  | T  | C  | A  | T  | A  | .  | T  | T  | C   | T   | .   | .   | A   | .   | .   | .   | A   | .   | .   | C   | T   | A   | C   | A   | C   | C   | G   | C   | C   |
| SKJ-IO-L4O-2               |  | - | - | - | -  | -  | -  | -  | -  | -  | -  | -  | -  | -  | -  | -  | -  | -  | -  | -   | -   | -   | -   | -   | -   | -   | -   | -   | -   | -   | -   | -   | -   | -   | -   | -   | -   | -   |     |     |
| SKJ-IO-L4B-2               |  | - | - | - | -  | -  | -  | -  | -  | -  | -  | -  | -  | -  | -  | -  | -  | -  | -  | -   | -   | -   | -   | -   | -   | -   | -   | -   | -   | -   | -   | -   | -   | -   | -   | -   | -   | -   |     |     |
| SKJ-IO-L1-3                |  | C | T | T | T  | C  | T  | C  | .  | C  | .  | T  | C  | A  | T  | A  | .  | T  | T  | C   | .   | .   | .   | A   | .   | G   | .   | A   | .   | .   | C   | T   | A   | C   | A   | C   | C   | G   | C   | C   |
| SKJ-IO-L2-3                |  | C | T | T | T  | C  | T  | C  | .  | C  | .  | T  | C  | A  | T  | A  | .  | T  | T  | C   | .   | .   | .   | A   | .   | G   | .   | A   | .   | .   | C   | T   | A   | C   | A   | C   | C   | G   | C   | C   |
| SKJ-IO-L3-3                |  | C | T | T | T  | C  | T  | C  | .  | C  | .  | T  | C  | A  | T  | A  | .  | T  | T  | C   | .   | .   | .   | A   | .   | G   | .   | A   | .   | .   | C   | T   | A   | C   | A   | C   | C   | G   | C   | C   |
| SKJ-IO-L4O-3               |  | - | - | - | -  | -  | -  | -  | -  | -  | -  | -  | -  | -  | -  | -  | -  | -  | -  | -   | -   | -   | -   | -   | -   | -   | -   | -   | -   | -   | -   | -   | -   | -   | -   | -   | -   | -   |     |     |
| SKJ-IO-L4B-3               |  | - | - | - | -  | -  | -  | -  | -  | -  | -  | -  | -  | -  | -  | -  | -  | -  | -  | -   | -   | -   | -   | -   | -   | -   | -   | -   | -   | -   | -   | -   | -   | -   | -   | -   | -   | -   |     |     |
| SKJ-WCPO-L1-1              |  | C | T | T | T  | C  | T  | C  | .  | C  | .  | T  | C  | A  | T  | A  | .  | T  | T  | C   | T   | .   | .   | A   | .   | .   | .   | A   | .   | .   | C   | T   | A   | C   | A   | C   | C   | G   | C   | C   |
| SKJ-WCPO-L2-1              |  | C | T | T | T  | C  | T  | C  | .  | C  | .  | T  | C  | A  | T  | A  | .  | T  | T  | C   | T   | .   | .   | A   | .   | .   | .   | A   | .   | .   | C   | T   | A   | C   | A   | C   | C   | G   | C   | C   |
| SKJ-WCPO-L3-1              |  | C | T | T | T  | C  | T  | C  | .  | C  | .  | T  | C  | A  | T  | A  | .  | T  | T  | C   | .   | .   | .   | A   | .   | .   | .   | A   | .   | .   | C   | T   | A   | C   | A   | C   | C   | .   | C   | C   |
| SKJ-WCPO-L4O-1             |  | - | - | - | -  | -  | -  | -  | -  | -  | -  | -  | -  | -  | -  | -  | -  | -  | -  | -   | -   | -   | -   | -   | -   | -   | -   | -   | -   | -   | -   | -   | -   | -   | -   | -   | -   | -   |     |     |
| SKJ-WCPO-L4B-1             |  | - | - | - | -  | -  | -  | -  | -  | -  | -  | -  | -  | -  | -  | -  | -  | -  | -  | -   | -   | -   | -   | -   | -   | -   | -   | -   | -   | -   | -   | -   | -   | -   | -   | -   | -   | -   |     |     |
| SKJ-WCPO-L1-2              |  | C | T | T | T  | C  | T  | C  | .  | C  | .  | T  | C  | A  | T  | A  | .  | T  | T  | C   | .   | .   | .   | A   | .   | .   | .   | A   | .   | .   | C   | T   | A   | C   | A   | C   | C   | .   | C   | C   |
| SKJ-WCPO-L2-2              |  | C | T | T | T  | C  | T  | C  | .  | C  | .  | T  | C  | A  | T  | A  | .  | T  | T  | C   | .   | .   | .   | A   | .   | .   | .   | A   | .   | .   | C   | T   | A   | C   | A   | C   | C   | .   | C   | C   |
| SKJ-WCPO-L3-2              |  | C | T | T | T  | C  | T  | C  | .  | C  | .  | T  | C  | A  | T  | A  | A  | T  | T  | C   | .   | .   | .   | A   | .   | .   | .   | A   | .   | .   | C   | T   | A   | C   | A   | C   | C   | .   | C   | C   |
| SKJ-WCPO-L4O-2             |  | - | - | - | -  | -  | -  | -  | -  | -  | -  | -  | -  | -  | -  | -  | -  | -  | -  | -   | -   | -   | -   | -   | -   | -   | -   | -   | -   | -   | -   | -   | -   | -   | -   | -   | -   | -   |     |     |
| SKJ-WCPO-L4B-2             |  | - | - | - | -  | -  | -  | -  | -  | -  | -  | -  | -  | -  | -  | -  | -  | -  | -  | -   | -   | -   | -   | -   | -   | -   | -   | -   | -   | -   | -   | -   | -   | -   | -   | -   | -   | -   |     |     |

# Supplementary Material

|                            | 2 | 6 | 9 | 18 | 21 | 30 | 33 | 36 | 39 | 45 | 63 | 69 | 72 | 75 | 84 | 90 | 93 | 96 | 102 | 105 | 108 | 109 | 111 | 120 | 123 | 129 | 132 | 144 | 151 | 156 | 162 | 174 | 180 | 183 | 192 | 198 | 213 | 219 | 231 |   |
|----------------------------|---|---|---|----|----|----|----|----|----|----|----|----|----|----|----|----|----|----|-----|-----|-----|-----|-----|-----|-----|-----|-----|-----|-----|-----|-----|-----|-----|-----|-----|-----|-----|-----|-----|---|
| NC 004901 <i>T.thynnus</i> | T | C | C | A  | T  | C  | T  | C  | A  | A  | A  | A  | C  | G  | T  | G  | C  | C  | T   | C   | C   | G   | C   | A   | A   | G   | T   | T   | A   | T   | C   | C   | T   | C   | T   | T   | A   | T   | T   |   |
| SKJ-WCPO-L1-3              | C | T | T | T  | C  | T  | C  | .  | C  | .  | T  | C  | A  | T  | A  | .  | T  | T  | C   | .   | .   | .   | A   | .   | G   | .   | A   | .   | .   | C   | T   | A   | C   | A   | C   | C   | .   | C   | C   |   |
| SKJ-WCPO-L2-3              | C | T | T | T  | C  | T  | C  | .  | C  | .  | T  | C  | A  | T  | A  | .  | T  | T  | C   | .   | .   | .   | A   | .   | G   | .   | A   | .   | .   | C   | T   | A   | C   | A   | C   | C   | .   | C   | C   |   |
| SKJ-WCPO-L3-3              | C | T | T | T  | C  | T  | C  | .  | C  | .  | T  | T  | A  | T  | A  | .  | T  | T  | C   | .   | T   | .   | A   | .   | G   | .   | A   | .   | .   | C   | T   | A   | C   | A   | C   | C   | .   | C   | C   |   |
| SKJ-WCPO-L4O-3             | - | - | - | -  | -  | -  | -  | -  | -  | -  | -  | -  | -  | -  | -  | -  | -  | -  | -   | -   | -   | -   | -   | -   | -   | .   | A   | .   | .   | C   | T   | A   | C   | A   | C   | C   | .   | C   | C   |   |
| SKJ-WCPO-L4B-3             | - | - | - | -  | -  | -  | -  | -  | -  | -  | -  | -  | -  | -  | -  | -  | -  | -  | -   | -   | -   | -   | -   | -   | -   | .   | C   | .   | .   | C   | T   | A   | C   | A   | C   | C   | .   | C   | C   |   |
| SKJ-EPO-L1-1               | C | T | T | T  | C  | T  | C  | .  | C  | .  | T  | C  | A  | T  | A  | .  | T  | T  | C   | T   | .   | .   | A   | .   | .   | .   | A   | .   | .   | C   | T   | A   | C   | A   | C   | C   | .   | C   | C   |   |
| SKJ-EPO-L2-1               | C | T | T | T  | C  | T  | C  | .  | C  | .  | T  | C  | A  | T  | A  | .  | T  | T  | C   | T   | .   | .   | A   | .   | .   | .   | A   | .   | .   | C   | T   | A   | C   | A   | C   | C   | .   | C   | C   |   |
| SKJ-EPO-L3-1               | C | T | T | T  | C  | T  | C  | .  | C  | .  | T  | C  | A  | T  | A  | .  | T  | T  | C   | T   | .   | .   | A   | .   | .   | .   | A   | .   | .   | C   | T   | A   | C   | A   | C   | C   | G   | .   | C   | C |
| SKJ-EPO-L4O-1              | - | - | - | -  | -  | -  | -  | -  | -  | -  | -  | -  | -  | -  | -  | -  | -  | -  | -   | -   | -   | -   | -   | -   | -   | .   | .   | .   | .   | .   | T   | .   | .   | .   | C   | .   | .   | C   | C   |   |
| SKJ-EPO-L4B-1              | - | - | - | -  | -  | -  | -  | -  | -  | -  | -  | -  | -  | -  | -  | -  | -  | -  | -   | -   | -   | -   | -   | -   | -   | .   | .   | .   | .   | T   | .   | .   | .   | C   | .   | .   | C   | C   |     |   |
| SKJ-EPO-L1-2               | C | T | T | T  | C  | T  | C  | .  | C  | .  | T  | C  | A  | T  | A  | A  | T  | T  | C   | .   | .   | C   | A   | .   | .   | .   | A   | .   | .   | C   | T   | A   | C   | A   | C   | C   | .   | C   | C   |   |
| SKJ-EPO-L2-2               | C | T | T | T  | C  | T  | C  | .  | C  | .  | T  | C  | A  | T  | A  | A  | T  | T  | C   | .   | .   | .   | A   | .   | .   | .   | A   | .   | .   | C   | T   | A   | C   | A   | C   | C   | .   | C   | C   |   |
| SKJ-EPO-L3-2               | C | T | T | T  | C  | T  | C  | .  | C  | .  | T  | C  | A  | T  | A  | A  | T  | T  | C   | .   | .   | .   | .   | .   | .   | .   | .   | .   | .   | T   | .   | .   | .   | C   | .   | .   | C   | C   |     |   |
| SKJ-EPO-L4O-2              | - | - | - | -  | -  | -  | -  | -  | -  | -  | -  | -  | -  | -  | -  | -  | -  | -  | -   | -   | -   | -   | -   | -   | -   | .   | .   | .   | .   | T   | .   | .   | .   | C   | .   | .   | C   | C   |     |   |
| SKJ-EPO-L4B-2              | - | - | - | -  | -  | -  | -  | -  | -  | -  | -  | -  | -  | -  | -  | -  | -  | -  | -   | -   | -   | -   | -   | -   | -   | .   | .   | .   | .   | T   | .   | .   | .   | C   | .   | .   | C   | C   |     |   |
| SKJ-EPO-L1-3               | C | T | T | T  | C  | T  | C  | .  | C  | .  | T  | C  | A  | T  | A  | .  | T  | T  | C   | .   | T   | .   | A   | .   | G   | .   | A   | .   | .   | C   | T   | A   | C   | A   | C   | C   | .   | C   | C   |   |
| SKJ-EPO-L2-3               | C | T | T | T  | C  | T  | C  | .  | C  | .  | T  | C  | A  | T  | A  | .  | T  | T  | C   | .   | T   | .   | A   | .   | G   | .   | A   | .   | .   | C   | T   | A   | C   | A   | C   | C   | .   | C   | C   |   |
| SKJ-EPO-L3-3               | C | T | T | T  | C  | T  | C  | .  | C  | .  | T  | C  | A  | T  | A  | .  | T  | T  | C   | T   | .   | .   | A   | .   | .   | .   | A   | .   | .   | C   | T   | A   | C   | A   | C   | C   | .   | C   | C   |   |
| SKJ-EPO-L4O-3              | - | - | - | -  | -  | -  | -  | -  | -  | -  | -  | -  | -  | -  | -  | -  | -  | -  | -   | -   | -   | -   | -   | -   | -   | .   | A   | .   | .   | C   | T   | A   | C   | A   | C   | C   | .   | C   | C   |   |
| SKJ-EPO-L4B-3              | - | - | - | -  | -  | -  | -  | -  | -  | -  | -  | -  | -  | -  | -  | -  | -  | -  | -   | -   | -   | -   | -   | -   | -   | .   | A   | .   | .   | C   | T   | A   | C   | A   | C   | C   | .   | C   | C   |   |

## Supplementary Material

|                            |  | 2 | 6 | 9 | 18 | 21 | 30 | 33 | 36 | 39 | 42 | 45 | 63 | 69 | 72 | 75 | 84 | 93 | 96 | 102 | 105 | 111 | 120 | 123 | 129 | 132 | 144 | 156 | 162 | 174 | 180 | 183 | 192 | 198 | 213 | 219 | 231 |
|----------------------------|--|---|---|---|----|----|----|----|----|----|----|----|----|----|----|----|----|----|----|-----|-----|-----|-----|-----|-----|-----|-----|-----|-----|-----|-----|-----|-----|-----|-----|-----|-----|
| NC 004901 <i>T.thynnus</i> |  | T | C | C | A  | T  | C  | T  | C  | A  | C  | A  | A  | A  | C  | G  | T  | C  | C  | T   | C   | C   | A   | A   | G   | T   | T   | T   | C   | C   | T   | C   | T   | T   | A   | T   | T   |
| LOT-IO-L1-1                |  | . | . | . | .  | .  | .  | .  | .  | .  | .  | .  | .  | .  | .  | T  | .  | .  | .  | .   | .   | .   | G   | .   | .   | .   | .   | .   | T   | .   | .   | .   | .   | .   | .   | C   | C   |
| LOT-IO-L2-1                |  | . | . | . | .  | .  | .  | .  | .  | .  | .  | .  | .  | .  | .  | T  | .  | .  | .  | .   | .   | .   | G   | .   | .   | .   | .   | .   | T   | .   | .   | .   | .   | .   | .   | C   | C   |
| LOT-IO-L3-1                |  | . | . | . | .  | .  | .  | .  | .  | .  | .  | .  | .  | .  | .  | T  | .  | .  | .  | .   | C   | A   | -   | -   | -   | -   | -   | -   | -   | -   | -   | -   | -   | -   | -   | -   |     |
| LOT-IO-L4O-1               |  | - | - | - | -  | -  | -  | -  | -  | -  | -  | -  | -  | -  | -  | -  | -  | -  | -  | -   | -   | -   | -   | -   | -   | -   | -   | T   | -   | -   | -   | -   | -   | -   | C   | C   |     |
| LOT-IO-L4B-1               |  | - | - | - | -  | -  | -  | -  | -  | -  | -  | -  | -  | -  | -  | -  | -  | -  | -  | -   | -   | -   | -   | -   | -   | -   | -   | T   | -   | -   | -   | -   | -   | -   | C   | C   |     |
| LOT-IO-L1-2                |  | . | . | . | .  | .  | .  | .  | .  | .  | .  | .  | .  | .  | .  | T  | .  | .  | .  | .   | .   | .   | G   | .   | .   | .   | .   | .   | T   | .   | .   | .   | .   | .   | .   | C   | C   |
| LOT-IO-L2-2                |  | . | . | . | .  | .  | .  | .  | .  | .  | .  | .  | .  | .  | .  | T  | .  | .  | .  | .   | .   | .   | G   | .   | .   | .   | .   | .   | T   | .   | .   | .   | .   | .   | .   | C   | C   |
| LOT-IO-L3-2                |  | . | . | . | .  | .  | .  | .  | .  | .  | T  | .  | .  | .  | .  | T  | .  | .  | .  | .   | .   | .   | .   | .   | -   | -   | -   | -   | T   | .   | .   | .   | .   | .   | .   | .   | C   |
| LOT-IO-L4O-2               |  | - | - | - | -  | -  | -  | -  | -  | -  | -  | -  | -  | -  | -  | -  | -  | -  | -  | -   | -   | -   | -   | -   | -   | -   | -   | T   | -   | -   | -   | -   | -   | -   | .   | C   |     |
| LOT-IO-L4B-2               |  | - | - | - | -  | -  | -  | -  | -  | -  | -  | -  | -  | -  | -  | -  | -  | -  | -  | -   | -   | -   | -   | -   | -   | -   | -   | T   | -   | -   | -   | -   | -   | -   | .   | C   |     |
| LOT-IO-L1-3                |  | . | . | . | .  | T  | .  | .  | .  | .  | T  | .  | .  | .  | .  | T  | .  | .  | .  | .   | .   | .   | G   | .   | .   | .   | .   | .   | T   | .   | .   | .   | .   | .   | .   | C   | C   |
| LOT-IO-L2-3                |  | . | . | . | .  | .  | .  | .  | .  | .  | T  | .  | .  | .  | .  | T  | .  | .  | .  | .   | .   | .   | .   | .   | .   | .   | .   | .   | T   | .   | .   | .   | .   | .   | .   | C   | C   |
| LOT-IO-L3-3                |  | . | . | . | .  | .  | .  | .  | .  | .  | T  | .  | .  | .  | .  | T  | .  | .  | .  | .   | .   | .   | .   | .   | .   | .   | .   | .   | T   | .   | .   | .   | .   | .   | .   | C   | C   |
| LOT-IO-L4O-3               |  | - | - | - | -  | -  | -  | -  | -  | -  | -  | -  | -  | -  | -  | -  | -  | -  | -  | -   | -   | -   | -   | -   | -   | -   | -   | T   | -   | -   | -   | -   | -   | .   | C   |     |     |
| LOT-IO-L4B-3               |  | - | - | - | -  | -  | -  | -  | -  | -  | -  | -  | -  | -  | -  | -  | -  | -  | -  | -   | -   | -   | -   | -   | -   | -   | -   | T   | -   | -   | -   | -   | -   | .   | C   |     |     |
