# Supplementary material for: Canning Processes Reduce the DNA-Based Traceability of Commercial Tropical Tunas
Source: MDPI journal article supplement (doi:10.3390/foods9101372), 2020-09-27
Supplement: s1 [file s1]

## Supplementary Material

Pecoraro et al. Canning processes reduce DNA-based traceability of commercial tropical tunas

**Table S1: 35 diagnostic positions of the Cyt b sequences of the four target species (YFT, yellowfin tuna, *Thunnus albacares* ; BET, bigeye tuna, *Thunnus obesus* ; SKJ, skipjack tuna, *Katsuwonus pelamis* ; LOT, longtail tuna, *Thunnus tonggol* ) aligned against to the ortholog sequence of the mitochondrial genome of *Thunnus thynnus* (NCBI: NC\_004901, positions 14665 – 14901, 236 bp) and to publicly available sequences for each of the four tuna species used as reference. The sequences obtained from the first processing level (L1-frozen samples) were aligned to the public sequences and they were considered as reference NS=0.**

|           |                          | 2 | 6 | 9 | 18 | 21 | 30 | 33 | 36 | 39 | 45 | 63 | 69 | 72 | 75 | 84 | 93 | 96 | 102 | 105 | 111 | 120 | 123 | 129 | 132 | 144 | 156 | 162 | 174 | 180 | 183 | 192 | 198 | 213 | 219 | 231 |
|-----------|--------------------------|---|---|---|----|----|----|----|----|----|----|----|----|----|----|----|----|----|-----|-----|-----|-----|-----|-----|-----|-----|-----|-----|-----|-----|-----|-----|-----|-----|-----|-----|
| NC 004901 | <i>Thunnus thynnus</i>   | T | C | C | A  | T  | C  | T  | C  | A  | A  | A  | A  | C  | G  | T  | C  | C  | T   | C   | C   | A   | A   | G   | T   | T   | T   | C   | C   | T   | C   | T   | T   | A   | T   | T   |
| DQ080271  | <i>Thunnus albacares</i> | . | . | . | .  | .  | .  | .  | .  | .  | G  | .  | .  | .  | A  | .  | .  | .  | .   | .   | .   | .   | .   | .   | .   | .   | .   | T   | .   | .   | T   | .   | .   | .   | .   | .   |
| DQ080281  | <i>Thunnus albacares</i> | . | . | . | .  | .  | .  | .  | .  | .  | G  | .  | .  | .  | A  | .  | .  | .  | .   | .   | .   | .   | .   | .   | .   | .   | .   | T   | .   | .   | T   | .   | .   | .   | .   | .   |
| DQ080282  | <i>Thunnus albacares</i> | . | . | . | .  | .  | .  | .  | .  | .  | G  | .  | .  | .  | A  | .  | .  | .  | .   | .   | .   | .   | .   | .   | .   | .   | .   | T   | .   | .   | T   | .   | .   | .   | .   | .   |
| DQ080283  | <i>Thunnus albacares</i> | . | . | . | .  | .  | .  | C  | .  | .  | G  | .  | .  | .  | A  | .  | .  | .  | C   | .   | .   | .   | .   | .   | .   | .   | .   | T   | .   | .   | .   | C   | .   | .   | .   | .   |
| DQ080284  | <i>Thunnus albacares</i> | . | . | . | .  | .  | .  | C  | .  | .  | G  | .  | .  | .  | A  | .  | .  | .  | .   | .   | .   | .   | .   | .   | .   | .   | .   | T   | .   | .   | T   | .   | .   | .   | .   | .   |
| DQ080285  | <i>Thunnus albacares</i> | . | . | . | .  | .  | .  | .  | .  | .  | G  | .  | .  | .  | A  | .  | .  | .  | .   | .   | .   | .   | .   | .   | .   | .   | .   | T   | .   | .   | T   | .   | .   | .   | C   | .   |
| DQ080286  | <i>Thunnus albacares</i> | . | . | . | .  | .  | .  | .  | .  | .  | G  | .  | .  | .  | A  | .  | .  | .  | .   | .   | .   | .   | .   | .   | .   | .   | .   | T   | .   | .   | T   | .   | .   | .   | .   | .   |
| DQ080287  | <i>Thunnus albacares</i> | . | . | . | .  | .  | .  | .  | .  | .  | G  | .  | .  | .  | A  | .  | .  | .  | .   | .   | .   | .   | .   | .   | .   | .   | .   | T   | .   | .   | T   | .   | .   | .   | .   | .   |
| DQ080288  | <i>Thunnus albacares</i> | . | . | . | .  | .  | .  | .  | .  | .  | G  | .  | .  | .  | A  | .  | .  | .  | .   | .   | .   | .   | .   | .   | .   | .   | C   | T   | .   | .   | T   | .   | .   | .   | .   | .   |
| DQ497898  | <i>Thunnus albacares</i> | . | . | . | .  | .  | .  | .  | .  | .  | G  | .  | .  | .  | A  | .  | .  | .  | .   | .   | .   | .   | .   | .   | .   | .   | .   | T   | .   | .   | T   | .   | .   | .   | C   | .   |
| DQ497899  | <i>Thunnus albacares</i> | . | . | . | .  | .  | .  | .  | .  | .  | G  | .  | .  | .  | A  | .  | .  | .  | .   | .   | .   | .   | .   | .   | .   | .   | .   | T   | .   | .   | T   | .   | .   | .   | .   | .   |
| DQ497900  | <i>Thunnus albacares</i> | . | . | . | .  | .  | .  | .  | .  | .  | G  | .  | .  | .  | A  | .  | .  | .  | .   | .   | .   | .   | .   | .   | .   | .   | .   | T   | .   | .   | T   | .   | .   | .   | C   | .   |
| DQ497901  | <i>Thunnus albacares</i> | . | . | . | .  | .  | .  | .  | .  | .  | G  | .  | .  | .  | A  | .  | .  | .  | .   | .   | .   | .   | .   | .   | .   | .   | .   | T   | .   | .   | T   | .   | .   | .   | C   | .   |
| DQ497902  | <i>Thunnus albacares</i> | . | . | . | .  | .  | .  | .  | .  | .  | G  | .  | .  | .  | A  | .  | .  | .  | .   | .   | .   | .   | .   | .   | .   | .   | .   | T   | .   | .   | T   | .   | .   | .   | C   | .   |
| DQ497903  | <i>Thunnus albacares</i> | . | . | . | .  | .  | .  | .  | .  | .  | G  | .  | .  | .  | A  | .  | .  | .  | .   | .   | .   | .   | .   | .   | .   | .   | .   | T   | .   | .   | T   | .   | .   | .   | .   | .   |
| DQ497904  | <i>Thunnus albacares</i> | . | . | . | .  | .  | .  | .  | .  | .  | G  | .  | .  | .  | A  | .  | .  | .  | .   | .   | .   | .   | .   | .   | .   | .   | .   | T   | .   | .   | T   | .   | .   | .   | .   | .   |
| EF141179  | <i>Thunnus albacares</i> | . | . | . | .  | .  | .  | .  | .  | .  | G  | .  | .  | .  | A  | .  | .  | .  | .   | .   | .   | .   | .   | .   | .   | .   | .   | T   | .   | .   | T   | .   | .   | .   | C   | .   |
| EF392629  | <i>Thunnus albacares</i> | . | . | . | .  | .  | .  | .  | .  | .  | G  | .  | .  | T  | A  | .  | .  | .  | .   | .   | .   | .   | .   | .   | .   | .   | .   | T   | .   | .   | T   | .   | .   | .   | .   | .   |
| EF392630  | <i>Thunnus albacares</i> | . | . | . | .  | .  | .  | .  | .  | .  | G  | .  | .  | .  | A  | .  | .  | .  | .   | .   | .   | .   | .   | .   | .   | .   | .   | T   | .   | .   | T   | .   | .   | .   | .   | .   |
| EF456025  | <i>Thunnus albacares</i> | . | . | . | .  | .  | .  | .  | .  | .  | G  | .  | .  | .  | A  | .  | .  | .  | .   | .   | .   | .   | .   | .   | .   | .   | .   | T   | .   | .   | T   | .   | .   | .   | .   | .   |
| EF456026  | <i>Thunnus albacares</i> | . | . | . | .  | .  | .  | .  | .  | .  | G  | .  | .  | .  | A  | .  | .  | .  | .   | .   | .   | .   | .   | .   | .   | .   | .   | T   | .   | .   | T   | .   | .   | .   | C   | .   |
| EU250968  | <i>Thunnus albacares</i> | . | . | . | .  | .  | .  | .  | .  | .  | G  | .  | .  | .  | A  | .  | .  | .  | .   | .   | .   | .   | .   | .   | .   | .   | C   | T   | .   | .   | T   | .   | .   | .   | .   | .   |
| EU250969  | <i>Thunnus albacares</i> | . | . | . | .  | .  | .  | .  | .  | .  | G  | .  | .  | .  | A  | .  | .  | .  | .   | .   | .   | .   | .   | .   | .   | .   | .   | T   | .   | .   | T   | .   | .   | .   | C   | .   |
| EU250970  | <i>Thunnus albacares</i> | . | . | . | .  | .  | .  | .  | .  | .  | G  | .  | .  | .  | A  | .  | .  | .  | .   | .   | .   | .   | .   | .   | .   | .   | .   | T   | .   | .   | T   | .   | .   | .   | C   | .   |
| EU250971  | <i>Thunnus albacares</i> | . | . | . | .  | .  | .  | .  | .  | .  | G  | .  | .  | .  | A  | .  | .  | .  | .   | .   | .   | .   | .   | .   | .   | .   | .   | T   | .   | .   | T   | .   | .   | .   | .   | .   |
| EU250972  | <i>Thunnus albacares</i> | . | . | . | .  | .  | .  | .  | .  | .  | G  | .  | .  | .  | A  | .  | .  | .  | .   | .   | .   | .   | .   | .   | .   | .   | .   | T   | .   | .   | T   | .   | .   | .   | C   | .   |
| EU250973  | <i>Thunnus albacares</i> | . | . | . | .  | .  | .  | .  | .  | .  | G  | .  | .  | .  | A  | .  | .  | .  | .   | .   | .   | .   | .   | .   | .   | .   | .   | T   | .   | .   | T   | .   | .   | .   | C   | .   |
| EU250979  | <i>Thunnus albacares</i> | . | . | . | .  | .  | .  | .  | .  | .  | G  | .  | .  | .  | A  | .  | .  | .  | .   | .   | .   | .   | .   | .   | .   | .   | .   | T   | .   | .   | T   | .   | .   | .   | C   | .   |
| EU250980  | <i>Thunnus albacares</i> | . | . | . | .  | .  | .  | .  | .  | .  | G  | .  | .  | .  | A  | .  | .  | .  | .   | .   | .   | .   | .   | .   | .   | .   | .   | T   | .   | .   | T   | .   | .   | .   | .   | .   |
| EU250984  | <i>Thunnus albacares</i> | . | . | . | .  | .  | .  | .  | .  | .  | G  | .  | .  | .  | A  | .  | .  | .  | .   | .   | .   | .   | .   | .   | .   | .   | .   | T   | .   | .   | T   | .   | .   | .   | C   | .   |
| EU250985  | <i>Thunnus albacares</i> | . | . | . | .  | .  | .  | .  | .  | .  | G  | .  | .  | .  | A  | .  | .  | .  | .   | .   | .   | .   | .   | .   | .   | .   | .   | T   | .   | .   | T   | .   | .   | .   | .   | .   |
| EU250986  | <i>Thunnus albacares</i> | . | . | . | .  | .  | .  | .  | .  | .  | G  | .  | .  | .  | A  | .  | .  | .  | .   | .   | .   | .   | .   | .   | .   | .   | .   | T   | .   | .   | T   | .   | .   | .   | C   | .   |
| EU427561  | <i>Thunnus albacares</i> | . | . | . | .  | .  | .  | .  | .  | .  | G  | .  | .  | .  | A  | .  | .  | .  | .   | .   | .   | .   | .   | .   | .   | .   | .   | T   | .   | .   | T   | .   | .   | .   | .   | .   |
| KC522353  | <i>Thunnus albacares</i> | . | . | . | .  | .  | .  | .  | .  | .  | G  | .  | .  | .  | A  | .  | .  | .  | .   | .   | .   | .   | .   | .   | .   | .   | .   | T   | .   | .   | T   | .   | .   | .   | .   | .   |

# Supplementary Material

|               |                          | 2 | 6 | 9 | 18 | 21 | 30 | 33 | 36 | 39 | 45 | 63 | 69 | 72 | 75 | 84 | 93 | 96 | 102 | 105 | 111 | 120 | 123 | 129 | 132 | 144 | 156 | 162 | 174 | 180 | 183 | 192 | 198 | 213 | 219 | 231 |   |
|---------------|--------------------------|---|---|---|----|----|----|----|----|----|----|----|----|----|----|----|----|----|-----|-----|-----|-----|-----|-----|-----|-----|-----|-----|-----|-----|-----|-----|-----|-----|-----|-----|---|
| KU904413      | <i>Thunnus albacares</i> | . | . | . | .  | .  | .  | C  | .  | .  | G  | .  | .  | .  | A  | .  | .  | .  | .   | .   | .   | .   | .   | .   | .   | .   | .   | .   | T   | .   | .   | T   | .   | .   | G   | .   | . |
| KX755257      | <i>Thunnus albacares</i> | . | . | . | .  | .  | .  | .  | .  | .  | G  | .  | .  | .  | A  | .  | .  | .  | .   | .   | .   | .   | .   | .   | .   | .   | .   | .   | T   | .   | .   | T   | .   | .   | .   | .   | . |
| KX755258      | <i>Thunnus albacares</i> | . | . | . | .  | .  | .  | .  | .  | .  | G  | .  | .  | .  | A  | .  | .  | .  | .   | .   | .   | .   | .   | .   | .   | .   | .   | .   | T   | .   | .   | T   | .   | .   | .   | C   | . |
| KX755259      | <i>Thunnus albacares</i> | . | . | . | .  | .  | .  | .  | .  | .  | G  | .  | .  | .  | A  | .  | .  | .  | .   | .   | .   | .   | .   | .   | .   | .   | C   | .   | T   | .   | .   | T   | .   | .   | .   | .   | . |
| KX755260      | <i>Thunnus albacares</i> | . | . | . | .  | .  | .  | C  | .  | .  | G  | .  | .  | .  | A  | .  | .  | .  | .   | .   | .   | .   | .   | .   | .   | .   | .   | .   | T   | .   | .   | T   | .   | .   | .   | .   | . |
| KX755261      | <i>Thunnus albacares</i> | . | . | . | .  | .  | .  | .  | .  | .  | G  | .  | .  | .  | A  | .  | .  | .  | .   | .   | .   | .   | .   | .   | .   | .   | .   | .   | T   | .   | .   | T   | .   | .   | .   | C   | . |
| KX755262      | <i>Thunnus albacares</i> | . | . | . | .  | .  | .  | .  | .  | .  | G  | .  | .  | .  | A  | .  | .  | .  | .   | .   | .   | .   | .   | .   | .   | .   | .   | .   | T   | .   | .   | T   | .   | .   | .   | .   | . |
| KX755263      | <i>Thunnus albacares</i> | . | . | . | .  | .  | .  | .  | .  | .  | G  | .  | .  | .  | A  | .  | .  | .  | .   | .   | .   | .   | .   | .   | .   | .   | .   | .   | T   | .   | .   | T   | .   | .   | .   | C   | . |
| KX755264      | <i>Thunnus albacares</i> | . | . | . | .  | .  | .  | .  | .  | .  | G  | .  | .  | .  | A  | .  | .  | .  | .   | .   | .   | .   | .   | .   | .   | .   | .   | .   | T   | .   | .   | T   | .   | .   | .   | .   | . |
| KX755265      | <i>Thunnus albacares</i> | . | . | . | .  | .  | .  | .  | .  | .  | G  | .  | .  | .  | A  | .  | .  | .  | .   | .   | .   | .   | .   | .   | .   | .   | .   | .   | T   | .   | .   | T   | .   | .   | .   | .   | . |
| KX755266      | <i>Thunnus albacares</i> | . | . | . | .  | .  | .  | .  | .  | .  | G  | .  | .  | .  | A  | .  | .  | .  | .   | .   | .   | .   | .   | .   | .   | .   | .   | .   | T   | .   | .   | T   | .   | .   | .   | C   | . |
| KX755267      | <i>Thunnus albacares</i> | . | . | . | .  | .  | .  | .  | .  | .  | G  | .  | .  | .  | A  | .  | .  | .  | .   | .   | .   | .   | .   | .   | .   | .   | .   | .   | T   | .   | .   | T   | .   | .   | .   | C   | . |
| KX755268      | <i>Thunnus albacares</i> | . | . | . | .  | .  | .  | .  | .  | .  | G  | .  | .  | .  | A  | .  | .  | .  | .   | .   | .   | .   | .   | .   | .   | .   | .   | .   | T   | .   | .   | T   | .   | .   | .   | .   | . |
| KX755269      | <i>Thunnus albacares</i> | . | . | . | .  | .  | .  | C  | .  | .  | G  | .  | .  | .  | A  | .  | .  | .  | .   | .   | .   | .   | .   | .   | .   | .   | .   | .   | T   | .   | .   | T   | .   | .   | .   | C   | . |
| KX755270      | <i>Thunnus albacares</i> | . | . | . | .  | .  | .  | .  | .  | .  | G  | .  | .  | .  | A  | .  | .  | .  | .   | .   | .   | .   | .   | .   | .   | .   | .   | .   | T   | .   | .   | T   | .   | .   | .   | C   | . |
| KX755271      | <i>Thunnus albacares</i> | . | . | . | .  | .  | .  | .  | .  | .  | G  | .  | .  | .  | A  | .  | .  | .  | .   | .   | .   | .   | .   | .   | .   | .   | .   | .   | T   | .   | .   | T   | .   | .   | .   | .   | . |
| KX755272      | <i>Thunnus albacares</i> | . | . | . | .  | .  | .  | .  | .  | .  | G  | .  | .  | .  | A  | .  | .  | .  | .   | .   | .   | .   | .   | .   | .   | .   | .   | .   | T   | .   | .   | T   | .   | .   | .   | .   | . |
| KX755273      | <i>Thunnus albacares</i> | . | . | . | .  | .  | .  | .  | .  | .  | G  | .  | .  | .  | A  | .  | .  | .  | .   | .   | .   | .   | .   | .   | .   | .   | C   | .   | T   | .   | .   | T   | .   | .   | .   | .   | . |
| KX755274      | <i>Thunnus albacares</i> | . | . | . | .  | .  | .  | .  | .  | .  | G  | .  | .  | .  | A  | .  | .  | .  | .   | .   | .   | .   | .   | .   | .   | .   | .   | .   | T   | .   | .   | T   | .   | .   | .   | .   | . |
| MG017682      | <i>Thunnus albacares</i> | . | . | . | .  | .  | .  | .  | .  | .  | G  | .  | .  | .  | A  | .  | .  | .  | .   | .   | .   | .   | .   | .   | .   | .   | .   | .   | T   | .   | .   | T   | .   | .   | .   | C   | . |
| MG017683      | <i>Thunnus albacares</i> | . | . | . | .  | .  | .  | .  | .  | .  | G  | .  | .  | .  | A  | .  | .  | .  | .   | .   | .   | .   | G   | .   | .   | .   | .   | .   | T   | .   | .   | T   | .   | .   | .   | C   | . |
| MG017684      | <i>Thunnus albacares</i> | . | . | . | .  | .  | .  | .  | .  | .  | .  | .  | .  | .  | A  | .  | .  | .  | .   | .   | .   | G   | .   | .   | .   | .   | .   | .   | T   | .   | .   | T   | .   | .   | .   | .   | . |
| MG017685      | <i>Thunnus albacares</i> | . | . | . | .  | .  | .  | .  | .  | .  | .  | .  | .  | .  | A  | .  | .  | .  | .   | .   | .   | G   | .   | .   | .   | .   | .   | .   | T   | .   | .   | T   | .   | .   | .   | .   | . |
| MG017686      | <i>Thunnus albacares</i> | . | . | . | .  | .  | .  | C  | .  | .  | G  | .  | .  | .  | A  | .  | .  | .  | .   | .   | .   | .   | .   | .   | .   | .   | .   | .   | T   | .   | .   | T   | .   | .   | .   | .   | . |
| MG017687      | <i>Thunnus albacares</i> | . | . | . | .  | .  | .  | .  | .  | .  | .  | .  | .  | .  | A  | .  | .  | .  | .   | .   | .   | .   | .   | .   | .   | .   | .   | .   | T   | .   | .   | .   | .   | .   | .   | .   | . |
| KM588080      | <i>Thunnus albacares</i> | . | . | . | .  | .  | .  | .  | .  | .  | G  | .  | .  | .  | A  | .  | .  | .  | .   | .   | .   | .   | .   | .   | .   | .   | .   | .   | T   | .   | .   | T   | .   | .   | .   | C   | . |
| NC 014061     | <i>Thunnus albacares</i> | . | . | . | .  | .  | .  | .  | .  | .  | G  | .  | .  | .  | A  | .  | .  | .  | .   | .   | .   | .   | .   | .   | .   | .   | .   | .   | T   | .   | .   | T   | .   | .   | .   | .   | . |
| GU256528      | <i>Thunnus albacares</i> | . | . | . | .  | .  | .  | .  | .  | .  | G  | .  | .  | .  | A  | .  | .  | .  | .   | .   | .   | .   | .   | .   | .   | .   | .   | .   | T   | .   | .   | T   | .   | .   | .   | .   | . |
| JN086153      | <i>Thunnus albacares</i> | . | . | . | .  | .  | .  | .  | .  | .  | G  | .  | .  | .  | A  | .  | .  | .  | .   | .   | .   | .   | .   | .   | .   | .   | .   | .   | T   | .   | .   | T   | .   | .   | .   | .   | . |
| KT724724      | <i>Thunnus albacares</i> | . | . | . | .  | .  | .  | C  | .  | .  | G  | .  | .  | .  | A  | .  | .  | .  | .   | .   | .   | .   | .   | .   | .   | .   | .   | .   | T   | .   | .   | T   | .   | .   | .   | .   | . |
| YFT-AO-L1-1   |                          | . | . | . | .  | .  | .  | .  | .  | .  | G  | .  | .  | .  | A  | .  | .  | .  | .   | .   | .   | .   | .   | .   | .   | .   | .   | .   | T   | .   | .   | T   | .   | .   | .   | C   | C |
| YFT-AO-L1-2   |                          | . | . | . | .  | .  | .  | .  | .  | .  | G  | .  | .  | .  | A  | .  | .  | .  | .   | .   | .   | .   | .   | .   | .   | .   | .   | .   | T   | .   | .   | T   | .   | .   | .   | C   | C |
| YFT-AO-L1-3   |                          | . | . | . | .  | .  | .  | .  | .  | .  | G  | .  | .  | .  | A  | .  | .  | .  | .   | .   | .   | .   | .   | .   | .   | .   | .   | .   | T   | .   | .   | T   | .   | .   | .   | C   | C |
| YFT-IO-L1-1   |                          | . | . | . | .  | .  | .  | .  | .  | .  | G  | .  | .  | .  | A  | .  | .  | .  | .   | .   | .   | .   | .   | .   | .   | .   | .   | .   | T   | .   | .   | T   | .   | .   | .   | C   | C |
| YFT-IO-L1-2   |                          | . | . | . | .  | .  | .  | .  | .  | .  | G  | .  | .  | .  | A  | .  | .  | .  | .   | .   | .   | .   | .   | .   | .   | .   | .   | .   | T   | .   | .   | T   | .   | .   | .   | C   | C |
| YFT-IO-L1-3   |                          | . | . | . | .  | .  | .  | .  | .  | .  | G  | .  | .  | .  | A  | .  | .  | .  | .   | .   | .   | .   | .   | .   | .   | .   | .   | .   | T   | .   | .   | T   | .   | .   | .   | C   | C |
| YFT-WCPO-L1-1 |                          | . | . | . | .  | .  | .  | .  | .  | .  | G  | .  | .  | .  | A  | .  | .  | .  | .   | .   | .   | .   | .   | .   | .   | .   | .   | .   | T   | .   | .   | T   | .   | .   | .   | C   | C |
| YFT-WCPO-L1-2 |                          | . | . | . | .  | .  | .  | .  | .  | .  | G  | .  | .  | .  | A  | .  | .  | .  | .   | .   | .   | .   | .   | .   | .   | .   | .   | .   | T   | .   | .   | T   | .   | .   | .   | C   | C |
| YFT-WCPO-L1-3 |                          | . | . | . | .  | .  | .  | .  | .  | .  | G  | .  | .  | .  | A  | .  | .  | .  | .   | .   | .   | .   | .   | .   | .   | .   | .   | .   | T   | .   | .   | T   | .   | .   | .   | C   | C |
| YFT-EPO-L1-1  |                          | . | . | . | .  | .  | .  | .  | .  | .  | G  | .  | .  | .  | A  | .  | .  | .  | .   | .   | .   | .   | .   | .   | .   | .   | C   | .   | T   | .   | .   | T   | .   | .   | .   | C   | C |
| YFT-EPO-L1-2  |                          | . | . | . | .  | .  | .  | .  | .  | .  | G  | .  | .  | .  | A  | .  | .  | .  | .   | .   | .   | .   | .   | .   | .   | .   | C   | .   | T   | .   | .   | T   | .   | .   | .   | C   | C |
| YFT-EPO-L1-3  |                          | . | . | . | .  | .  | .  | .  | .  | .  | G  | .  | .  | .  | A  | .  | .  | .  | .   | .   | .   | .   | .   | .   | .   | .   | C   | .   | T   | .   | .   | T   | .   | .   | .   | C   | C |

## Supplementary Material

|           |                       | 2 | 6 | 9 | 18 | 21 | 30 | 33 | 36 | 39 | 45 | 63 | 69 | 72 | 75 | 84 | 93 | 96 | 102 | 105 | 111 | 120 | 123 | 129 | 132 | 144 | 156 | 162 | 174 | 180 | 183 | 192 | 198 | 213 | 219 | 231 |   |
|-----------|-----------------------|---|---|---|----|----|----|----|----|----|----|----|----|----|----|----|----|----|-----|-----|-----|-----|-----|-----|-----|-----|-----|-----|-----|-----|-----|-----|-----|-----|-----|-----|---|
| DQ080272  | <i>Thunnus obesus</i> | . | . | . | .  | .  | .  | .  | .  | .  | .  | .  | .  | A  | A  | .  | .  | .  | C   | .   | .   | .   | .   | .   | .   | .   | .   | .   | T   | .   | .   | .   | C   | .   | .   | .   | . |
| DQ080273  | <i>Thunnus obesus</i> | . | . | . | .  | .  | .  | .  | .  | .  | .  | .  | .  | A  | A  | .  | .  | .  | C   | .   | .   | .   | .   | .   | .   | .   | .   | .   | T   | .   | C   | .   | C   | .   | .   | .   | . |
| DQ080274  | <i>Thunnus obesus</i> | . | . | . | .  | .  | .  | .  | .  | .  | .  | .  | .  | A  | A  | .  | .  | .  | C   | .   | .   | .   | .   | .   | .   | .   | .   | .   | T   | .   | .   | .   | C   | .   | .   | .   | . |
| DQ080275  | <i>Thunnus obesus</i> | . | . | . | .  | .  | .  | .  | .  | .  | .  | .  | .  | A  | A  | .  | .  | .  | C   | .   | .   | .   | .   | .   | .   | .   | .   | .   | T   | .   | .   | .   | C   | .   | .   | .   | . |
| DQ080276  | <i>Thunnus obesus</i> | . | . | . | .  | .  | .  | .  | .  | .  | .  | .  | .  | A  | A  | .  | .  | .  | .   | .   | .   | .   | .   | .   | .   | .   | .   | .   | T   | .   | .   | .   | .   | .   | G   | .   | . |
| DQ080277  | <i>Thunnus obesus</i> | . | . | . | .  | .  | .  | .  | .  | .  | .  | .  | .  | A  | A  | .  | .  | .  | .   | .   | .   | .   | .   | .   | .   | .   | .   | .   | T   | .   | .   | .   | .   | G   | .   | .   | . |
| DQ080278  | <i>Thunnus obesus</i> | . | . | . | .  | .  | .  | .  | .  | .  | .  | .  | .  | A  | A  | .  | .  | .  | .   | .   | .   | .   | .   | .   | .   | .   | .   | .   | T   | .   | .   | .   | .   | G   | .   | .   | . |
| DQ080279  | <i>Thunnus obesus</i> | . | . | . | .  | .  | .  | .  | .  | .  | .  | .  | .  | A  | A  | .  | .  | .  | C   | .   | .   | .   | .   | .   | .   | .   | .   | .   | T   | .   | .   | .   | C   | .   | .   | .   | . |
| DQ080280  | <i>Thunnus obesus</i> | . | . | . | .  | .  | .  | .  | .  | .  | .  | .  | .  | A  | A  | .  | .  | .  | C   | .   | .   | .   | .   | .   | .   | .   | .   | .   | T   | .   | .   | .   | C   | .   | .   | .   | . |
| DQ198013  | <i>Thunnus obesus</i> | . | . | . | .  | .  | .  | .  | .  | .  | .  | .  | .  | A  | A  | .  | .  | .  | C   | .   | .   | .   | .   | .   | .   | .   | .   | .   | T   | .   | .   | .   | C   | .   | .   | .   | . |
| DQ497910  | <i>Thunnus obesus</i> | . | . | . | .  | .  | .  | .  | .  | .  | .  | .  | .  | A  | A  | .  | .  | .  | C   | .   | .   | .   | .   | .   | .   | .   | .   | .   | T   | .   | .   | .   | C   | .   | .   | .   | . |
| DQ497911  | <i>Thunnus obesus</i> | . | . | . | .  | .  | .  | .  | .  | .  | .  | .  | .  | A  | A  | .  | .  | .  | C   | .   | .   | .   | .   | .   | .   | .   | .   | C   | T   | .   | .   | .   | C   | .   | .   | .   | . |
| DQ497912  | <i>Thunnus obesus</i> | . | . | . | .  | .  | .  | .  | .  | .  | .  | .  | .  | A  | A  | .  | .  | .  | C   | .   | .   | .   | .   | .   | .   | .   | .   | .   | T   | .   | .   | .   | C   | .   | .   | .   | . |
| EF141180  | <i>Thunnus obesus</i> | . | . | . | .  | .  | .  | .  | .  | .  | G  | .  | .  | .  | A  | .  | .  | .  | .   | .   | .   | .   | .   | .   | .   | .   | .   | .   | T   | .   | .   | T   | .   | .   | G   | .   | . |
| EF392631  | <i>Thunnus obesus</i> | . | . | . | .  | .  | .  | .  | .  | .  | .  | .  | .  | A  | A  | .  | .  | .  | C   | .   | .   | .   | .   | .   | .   | .   | .   | .   | T   | .   | .   | .   | C   | .   | .   | .   | . |
| EF392632  | <i>Thunnus obesus</i> | . | . | . | .  | .  | .  | .  | .  | .  | .  | .  | .  | A  | A  | .  | .  | .  | .   | .   | .   | .   | .   | .   | .   | .   | .   | .   | T   | .   | .   | .   | .   | G   | .   | .   | . |
| EF439240  | <i>Thunnus obesus</i> | . | . | . | .  | .  | .  | .  | .  | .  | .  | .  | .  | A  | A  | .  | .  | .  | .   | .   | .   | .   | .   | .   | .   | .   | .   | .   | T   | .   | .   | .   | .   | G   | .   | .   | . |
| EF439241  | <i>Thunnus obesus</i> | . | . | . | .  | .  | .  | .  | .  | .  | .  | .  | .  | A  | A  | .  | .  | .  | .   | .   | .   | .   | .   | .   | .   | .   | .   | .   | T   | .   | .   | .   | .   | G   | .   | .   | . |
| EF456027  | <i>Thunnus obesus</i> | . | . | . | .  | .  | .  | .  | .  | .  | G  | .  | .  | .  | A  | .  | .  | .  | .   | .   | .   | .   | .   | .   | .   | .   | .   | .   | T   | .   | .   | T   | .   | .   | .   | .   | . |
| EF456028  | <i>Thunnus obesus</i> | . | . | . | .  | .  | .  | .  | .  | .  | G  | .  | .  | .  | A  | .  | .  | .  | .   | .   | .   | .   | .   | .   | .   | .   | .   | .   | T   | .   | .   | T   | .   | .   | .   | .   | . |
| EU224036  | <i>Thunnus obesus</i> | . | . | . | .  | .  | .  | .  | .  | .  | .  | .  | .  | A  | A  | .  | .  | .  | .   | .   | .   | .   | .   | .   | .   | .   | .   | .   | T   | .   | .   | .   | .   | G   | .   | .   | . |
| EU349400  | <i>Thunnus obesus</i> | . | . | . | .  | .  | .  | .  | .  | .  | .  | .  | .  | A  | A  | .  | .  | .  | C   | .   | .   | .   | .   | .   | .   | .   | .   | .   | T   | .   | .   | .   | C   | .   | .   | .   | . |
| EU349401  | <i>Thunnus obesus</i> | . | . | . | .  | .  | .  | .  | .  | .  | .  | .  | .  | A  | A  | .  | .  | .  | C   | .   | .   | .   | .   | .   | .   | .   | .   | .   | T   | .   | .   | .   | C   | .   | .   | .   | . |
| EU349402  | <i>Thunnus obesus</i> | . | . | . | .  | .  | .  | .  | .  | .  | .  | .  | .  | A  | A  | .  | .  | .  | C   | .   | .   | .   | .   | .   | .   | .   | .   | .   | T   | .   | .   | .   | C   | .   | .   | .   | . |
| EU935767  | <i>Thunnus obesus</i> | . | . | . | .  | .  | .  | .  | .  | .  | .  | .  | .  | A  | A  | .  | .  | .  | C   | .   | .   | .   | .   | .   | .   | .   | .   | .   | T   | .   | .   | .   | C   | .   | .   | .   | . |
| EU935768  | <i>Thunnus obesus</i> | . | . | . | .  | .  | .  | .  | .  | .  | .  | .  | .  | A  | A  | .  | .  | .  | C   | .   | .   | .   | .   | .   | .   | .   | .   | .   | T   | .   | .   | .   | C   | .   | .   | .   | . |
| EU935769  | <i>Thunnus obesus</i> | . | . | . | .  | .  | .  | .  | .  | .  | .  | .  | .  | A  | A  | .  | .  | .  | C   | .   | .   | .   | .   | .   | .   | .   | .   | .   | T   | .   | .   | .   | C   | .   | .   | .   | . |
| EU935770  | <i>Thunnus obesus</i> | . | . | . | .  | .  | .  | .  | .  | .  | .  | .  | .  | A  | A  | .  | .  | .  | C   | .   | .   | .   | .   | .   | .   | .   | .   | .   | T   | .   | .   | .   | C   | .   | .   | .   | . |
| EU935771  | <i>Thunnus obesus</i> | . | . | . | .  | .  | .  | .  | .  | .  | .  | .  | .  | A  | A  | .  | .  | .  | C   | .   | .   | .   | .   | .   | .   | .   | .   | .   | T   | .   | .   | .   | C   | .   | .   | .   | . |
| EU935772  | <i>Thunnus obesus</i> | . | . | . | .  | .  | .  | .  | .  | .  | .  | .  | .  | A  | A  | .  | .  | .  | C   | .   | .   | .   | .   | .   | .   | .   | .   | .   | T   | .   | .   | .   | C   | .   | .   | .   | . |
| EU935773  | <i>Thunnus obesus</i> | . | . | . | .  | .  | .  | .  | .  | .  | .  | .  | .  | A  | A  | .  | .  | .  | C   | .   | .   | .   | .   | .   | .   | .   | .   | .   | T   | .   | .   | .   | C   | .   | .   | .   | . |
| GU256525  | <i>Thunnus obesus</i> | . | . | . | .  | .  | .  | .  | .  | .  | .  | .  | .  | A  | A  | .  | .  | .  | .   | .   | .   | .   | .   | .   | .   | .   | .   | .   | T   | .   | .   | .   | .   | G   | .   | .   | . |
| KY400011  | <i>Thunnus obesus</i> | . | . | . | .  | .  | .  | .  | .  | .  | .  | .  | .  | A  | A  | .  | .  | .  | .   | .   | .   | .   | .   | .   | .   | .   | .   | .   | T   | .   | .   | .   | .   | G   | .   | .   | . |
| NC 014059 | <i>Thunnus obesus</i> | . | . | . | .  | .  | .  | .  | .  | .  | .  | .  | .  | A  | A  | .  | .  | .  | .   | .   | .   | .   | .   | .   | .   | .   | .   | .   | T   | .   | .   | .   | .   | G   | .   | .   | . |
| JN086152  | <i>Thunnus obesus</i> | . | . | . | .  | .  | .  | .  | .  | .  | .  | .  | .  | A  | A  | .  | .  | .  | C   | .   | .   | .   | .   | .   | .   | .   | .   | .   | T   | .   | C   | .   | C   | .   | .   | .   | . |
| KC522356  | <i>Thunnus obesus</i> | . | . | . | .  | .  | .  | .  | .  | .  | .  | .  | .  | A  | A  | .  | .  | .  | C   | .   | .   | .   | .   | .   | .   | .   | .   | .   | T   | .   | .   | .   | C   | .   | .   | .   | . |
| MG017688  | <i>Thunnus obesus</i> | . | . | . | .  | .  | .  | .  | .  | .  | .  | .  | .  | A  | A  | .  | .  | .  | C   | .   | .   | .   | .   | .   | .   | .   | .   | .   | T   | .   | .   | .   | C   | .   | .   | .   | . |
| MG017689  | <i>Thunnus obesus</i> | . | . | . | .  | .  | .  | .  | .  | .  | .  | .  | .  | A  | A  | .  | .  | .  | C   | .   | .   | .   | .   | .   | .   | .   | .   | .   | T   | .   | .   | .   | C   | .   | .   | .   | . |
| MG017690  | <i>Thunnus obesus</i> | . | . | . | .  | .  | .  | .  | .  | .  | .  | .  | .  | A  | A  | .  | .  | .  | C   | .   | .   | .   | .   | .   | .   | .   | .   | .   | T   | .   | .   | .   | C   | .   | .   | .   | . |
| MG017691  | <i>Thunnus obesus</i> | . | . | . | .  | .  | .  | .  | .  | .  | .  | .  | .  | A  | A  | .  | .  | .  | C   | .   | .   | .   | .   | .   | .   | .   | .   | .   | T   | .   | .   | .   | C   | .   | .   | .   | . |
| MG017692  | <i>Thunnus obesus</i> | . | . | . | .  | .  | .  | .  | .  | .  | .  | .  | .  | A  | A  | .  | .  | .  | C   | .   | .   | .   | .   | .   | .   | .   | .   | .   | T   | .   | .   | .   | C   | .   | .   | .   | . |
| MG017693  | <i>Thunnus obesus</i> | . | . | . | .  | .  | .  | .  | .  | .  | .  | .  | .  | A  | A  | .  | .  | .  | C   | .   | .   | .   | .   | .   | .   | .   | .   | .   | T   | .   | C   | .   | C   | .   | .   | .   | . |

## Supplementary Material

|          |                           | 2 | 6 | 9 | 18 | 21 | 30 | 33 | 36 | 39 | 45 | 63 | 69 | 72 | 75 | 84 | 93 | 96 | 102 | 105 | 111 | 120 | 123 | 129 | 132 | 144 | 156 | 162 | 174 | 180 | 183 | 192 | 198 | 213 | 219 | 231 |   |  |
|----------|---------------------------|---|---|---|----|----|----|----|----|----|----|----|----|----|----|----|----|----|-----|-----|-----|-----|-----|-----|-----|-----|-----|-----|-----|-----|-----|-----|-----|-----|-----|-----|---|--|
| MG017694 | <i>Thunnus obesus</i>     | . | . | . | .  | .  | .  | .  | .  | .  | .  | .  | .  | A  | A  | .  | .  | .  | C   | .   | .   | .   | .   | .   | .   | .   | .   | .   | T   | .   | .   | .   | C   | .   | .   | .   | . |  |
| MG017695 | <i>Thunnus obesus</i>     | . | . | . | .  | .  | .  | .  | .  | .  | .  | .  | .  | A  | A  | .  | .  | .  | C   | .   | .   | .   | .   | .   | .   | .   | .   | .   | T   | .   | .   | .   | C   | .   | .   | .   | . |  |
| MG017696 | <i>Thunnus obesus</i>     | . | . | . | .  | .  | .  | .  | .  | .  | .  | .  | .  | A  | A  | .  | .  | .  | C   | .   | .   | .   | .   | .   | .   | .   | .   | .   | T   | .   | .   | .   | C   | .   | .   | .   | . |  |
| MG017697 | <i>Thunnus obesus</i>     | . | . | . | .  | .  | .  | .  | .  | .  | .  | .  | .  | A  | A  | .  | .  | .  | C   | .   | .   | .   | .   | .   | .   | .   | .   | .   | T   | .   | C   | .   | C   | .   | .   | .   | . |  |
|          | BET-IO-L1-1               | . | . | . | .  | .  | .  | .  | .  | .  | .  | .  | .  | A  | A  | .  | .  | .  | C   | .   | .   | .   | .   | .   | .   | .   | .   | .   | T   | .   | .   | .   | C   | .   | .   | C   | C |  |
|          | BET-IO-L1-2               | . | . | . | .  | .  | .  | .  | .  | .  | .  | .  | .  | A  | A  | .  | .  | .  | C   | .   | .   | .   | .   | .   | .   | .   | .   | .   | T   | .   | .   | .   | C   | .   | .   | C   | C |  |
|          | BET-IO-L1-3               | . | . | . | .  | .  | .  | .  | .  | .  | .  | .  | .  | A  | A  | .  | .  | .  | C   | .   | .   | .   | .   | .   | .   | .   | .   | .   | T   | .   | .   | .   | C   | .   | .   | C   | C |  |
|          | BET-EPO-L1-1              | . | . | . | .  | .  | .  | .  | .  | .  | .  | .  | .  | A  | A  | .  | .  | .  | C   | .   | .   | .   | .   | .   | .   | .   | .   | .   | T   | .   | .   | .   | C   | .   | .   | C   | C |  |
|          | BET-EPO-L1-2              | . | . | . | .  | .  | .  | .  | .  | .  | .  | .  | .  | A  | A  | .  | .  | .  | C   | .   | .   | .   | .   | .   | .   | .   | .   | .   | T   | .   | .   | .   | C   | .   | .   | C   | C |  |
|          | BET-EPO-L1-3              | . | . | . | .  | .  | .  | .  | .  | .  | .  | .  | .  | A  | A  | .  | .  | .  | C   | .   | .   | .   | .   | .   | .   | .   | .   | .   | T   | .   | .   | .   | C   | .   | .   | C   | C |  |
| DQ197958 | <i>Katsuwonus pelamis</i> | C | T | T | T  | C  | T  | C  | .  | C  | .  | T  | C  | A  | T  | A  | T  | T  | C   | .   | A   | .   | G   | .   | A   | .   | C   | T   | A   | C   | A   | C   | C   | .   | .   | C   |   |  |
| EF392592 | <i>Katsuwonus pelamis</i> | C | T | T | T  | C  | T  | C  | .  | C  | .  | T  | C  | A  | T  | A  | T  | T  | C   | .   | A   | .   | G   | .   | A   | .   | C   | T   | A   | C   | A   | C   | C   | .   | .   | C   |   |  |
| EF392591 | <i>Katsuwonus pelamis</i> | C | T | T | T  | C  | T  | C  | .  | C  | .  | .  | C  | A  | T  | A  | T  | T  | C   | .   | A   | .   | G   | .   | A   | .   | C   | T   | A   | C   | A   | C   | C   | .   | .   | C   |   |  |
| EF439209 | <i>Katsuwonus pelamis</i> | C | T | T | T  | C  | T  | C  | .  | C  | .  | T  | C  | A  | T  | A  | T  | T  | C   | .   | A   | .   | .   | .   | A   | .   | C   | T   | A   | C   | A   | C   | C   | .   | .   | C   |   |  |
| EF439208 | <i>Katsuwonus pelamis</i> | C | T | T | T  | C  | T  | C  | .  | C  | .  | T  | C  | A  | T  | A  | T  | T  | C   | .   | A   | .   | .   | .   | A   | .   | C   | T   | A   | C   | A   | C   | C   | .   | .   | C   |   |  |
| EF427567 | <i>Katsuwonus pelamis</i> | C | T | T | T  | C  | T  | C  | .  | C  | .  | T  | C  | A  | T  | A  | T  | T  | C   | .   | A   | .   | G   | .   | A   | .   | C   | T   | A   | C   | A   | C   | C   | .   | .   | C   |   |  |
| EF427566 | <i>Katsuwonus pelamis</i> | C | T | T | T  | C  | T  | C  | .  | C  | .  | T  | C  | A  | T  | A  | T  | T  | C   | .   | A   | .   | G   | .   | A   | .   | C   | T   | A   | C   | A   | C   | C   | .   | .   | C   |   |  |
| KP669172 | <i>Katsuwonus pelamis</i> | C | T | T | T  | C  | T  | C  | .  | C  | .  | T  | C  | A  | T  | A  | T  | T  | C   | .   | A   | .   | G   | .   | A   | .   | C   | T   | A   | C   | A   | C   | C   | .   | .   | C   |   |  |
| KP669171 | <i>Katsuwonus pelamis</i> | C | T | T | T  | C  | T  | .  | .  | C  | .  | T  | C  | A  | T  | A  | T  | T  | C   | T   | A   | .   | G   | .   | A   | .   | C   | T   | A   | C   | A   | C   | C   | .   | .   | C   |   |  |
| KP669170 | <i>Katsuwonus pelamis</i> | C | T | T | T  | C  | T  | C  | .  | C  | .  | T  | C  | A  | T  | A  | T  | T  | C   | T   | A   | .   | .   | .   | A   | .   | C   | T   | A   | C   | A   | C   | C   | G   | .   | .   | C |  |
| KP669169 | <i>Katsuwonus pelamis</i> | C | . | T | T  | C  | T  | C  | .  | C  | .  | T  | C  | A  | T  | A  | T  | T  | C   | .   | A   | .   | .   | .   | A   | .   | C   | T   | A   | C   | A   | C   | C   | G   | .   | .   | C |  |
| KP669168 | <i>Katsuwonus pelamis</i> | C | T | T | T  | C  | T  | C  | .  | C  | .  | T  | C  | A  | T  | A  | T  | T  | C   | .   | A   | .   | G   | .   | A   | .   | C   | T   | A   | C   | A   | C   | C   | .   | .   | C   |   |  |
| KP669167 | <i>Katsuwonus pelamis</i> | C | T | T | T  | C  | T  | C  | .  | C  | .  | T  | C  | A  | T  | A  | T  | T  | C   | .   | A   | .   | G   | .   | A   | .   | C   | T   | A   | C   | A   | C   | C   | .   | .   | C   |   |  |
| KP669166 | <i>Katsuwonus pelamis</i> | C | T | T | T  | C  | T  | C  | .  | C  | .  | T  | C  | A  | T  | A  | T  | T  | C   | .   | A   | .   | G   | .   | A   | .   | C   | T   | A   | C   | A   | C   | C   | .   | .   | C   |   |  |
| KP669165 | <i>Katsuwonus pelamis</i> | C | T | T | T  | C  | T  | C  | .  | C  | .  | T  | C  | A  | T  | A  | T  | T  | C   | .   | A   | .   | .   | .   | A   | .   | C   | T   | A   | C   | A   | C   | C   | G   | .   | .   | C |  |
| KP669164 | <i>Katsuwonus pelamis</i> | C | T | T | T  | C  | T  | C  | .  | C  | .  | T  | C  | A  | T  | A  | T  | T  | C   | .   | A   | .   | G   | A   | A   | .   | C   | T   | A   | C   | A   | C   | C   | .   | .   | C   |   |  |
| KP669163 | <i>Katsuwonus pelamis</i> | C | T | T | T  | C  | .  | C  | .  | C  | .  | T  | C  | A  | T  | A  | T  | T  | C   | .   | A   | .   | G   | .   | A   | .   | C   | T   | A   | C   | A   | C   | C   | G   | .   | .   | C |  |
| KP669162 | <i>Katsuwonus pelamis</i> | C | T | T | T  | C  | T  | C  | .  | C  | .  | T  | C  | A  | T  | A  | T  | T  | C   | T   | A   | .   | .   | .   | A   | .   | C   | T   | A   | C   | A   | C   | C   | G   | .   | .   | C |  |
| KP669161 | <i>Katsuwonus pelamis</i> | C | T | T | T  | C  | T  | C  | .  | C  | .  | T  | C  | A  | T  | A  | T  | T  | C   | .   | A   | .   | G   | .   | A   | .   | C   | T   | A   | C   | A   | C   | C   | .   | .   | C   |   |  |
| KP669160 | <i>Katsuwonus pelamis</i> | C | T | T | T  | C  | T  | C  | .  | C  | .  | T  | C  | A  | T  | A  | T  | T  | C   | .   | A   | .   | G   | .   | A   | .   | C   | T   | A   | C   | A   | C   | C   | .   | .   | C   |   |  |
| KP669159 | <i>Katsuwonus pelamis</i> | C | T | T | T  | C  | T  | C  | .  | C  | .  | T  | C  | A  | T  | A  | T  | T  | C   | T   | A   | .   | .   | .   | A   | .   | C   | T   | A   | C   | A   | C   | C   | .   | .   | C   |   |  |
| KP669158 | <i>Katsuwonus pelamis</i> | C | T | T | T  | C  | T  | C  | .  | C  | .  | T  | C  | A  | T  | A  | T  | T  | C   | T   | A   | .   | .   | .   | A   | .   | C   | T   | A   | C   | A   | C   | C   | G   | .   | .   | C |  |
| KP669157 | <i>Katsuwonus pelamis</i> | C | T | T | T  | C  | T  | C  | .  | C  | .  | T  | C  | A  | C  | A  | T  | T  | C   | T   | A   | .   | .   | A   | A   | .   | C   | T   | A   | C   | A   | C   | C   | .   | .   | C   |   |  |
| KP669156 | <i>Katsuwonus pelamis</i> | C | T | T | T  | C  | T  | C  | .  | C  | .  | T  | C  | A  | T  | A  | T  | T  | C   | .   | A   | .   | G   | .   | A   | .   | C   | T   | A   | C   | A   | C   | C   | .   | .   | C   |   |  |
| KP669155 | <i>Katsuwonus pelamis</i> | C | T | T | T  | C  | T  | C  | .  | C  | .  | T  | C  | A  | T  | A  | T  | T  | C   | T   | A   | .   | .   | .   | A   | .   | C   | T   | A   | C   | A   | C   | C   | G   | .   | .   | . |  |
| KP669154 | <i>Katsuwonus pelamis</i> | C | T | T | T  | C  | T  | C  | .  | C  | .  | T  | C  | A  | T  | A  | T  | T  | C   | T   | A   | .   | .   | .   | A   | .   | C   | T   | A   | C   | A   | C   | C   | .   | .   | C   |   |  |
| KP669153 | <i>Katsuwonus pelamis</i> | C | T | T | T  | C  | T  | C  | .  | C  | .  | T  | C  | A  | T  | A  | T  | T  | C   | T   | A   | .   | .   | .   | A   | .   | C   | T   | A   | C   | A   | C   | C   | .   | .   | .   |   |  |
| KP669152 | <i>Katsuwonus pelamis</i> | C | T | T | T  | C  | T  | C  | .  | C  | .  | T  | C  | A  | T  | A  | T  | T  | C   | .   | A   | .   | G   | .   | A   | .   | C   | T   | A   | C   | A   | C   | C   | G   | .   | .   | C |  |
| KP669151 | <i>Katsuwonus pelamis</i> | C | T | T | T  | C  | T  | C  | .  | C  | .  | T  | C  | A  | T  | A  | T  | T  | C   | .   | A   | .   | G   | .   | A   | .   | C   | T   | A   | C   | A   | C   | C   | .   | .   | C   |   |  |
| KP669150 | <i>Katsuwonus pelamis</i> | C | T | T | T  | C  | T  | C  | .  | C  | .  | T  | C  | A  | T  | A  | T  | T  | C   | T   | A   | .   | .   | .   | A   | .   | C   | T   | A   | C   | A   | C   | C   | G   | .   | .   | C |  |
| KP669149 | <i>Katsuwonus pelamis</i> | C | T | T | T  | C  | T  | C  | .  | C  | .  | T  | C  | A  | T  | A  | T  | T  | C   | T   | A   | .   | .   | .   | A   | .   | C   | T   | A   | C   | A   | C   | C   | G   | .   | .   | C |  |
| KP669148 | <i>Katsuwonus pelamis</i> | C | T | T | T  | C  | T  | C  | .  | C  | .  | T  | C  | A  | T  | A  | T  | T  | C   | .   | G   | .   | G   | .   | A   | .   | C   | T   | A   | C   | A   | C   | C   | .   | .   | C   |   |  |

## Supplementary Material

|          |                           | 2 | 6 | 9 | 18 | 21 | 30 | 33 | 36 | 39 | 45 | 63 | 69 | 72 | 75 | 84 | 93 | 96 | 102 | 105 | 111 | 120 | 123 | 129 | 132 | 144 | 156 | 162 | 174 | 180 | 183 | 192 | 198 | 213 | 219 | 231 |
|----------|---------------------------|---|---|---|----|----|----|----|----|----|----|----|----|----|----|----|----|----|-----|-----|-----|-----|-----|-----|-----|-----|-----|-----|-----|-----|-----|-----|-----|-----|-----|-----|
| KP669147 | <i>Katsuwonos pelamis</i> | C | T | T | T  | C  | T  | C  | .  | C  | .  | T  | C  | A  | T  | A  | T  | T  | C   | T   | A   | .   | .   | .   | A   | .   | C   | T   | A   | C   | A   | C   | C   | G   | .   | C   |
| KP669146 | <i>Katsuwonos pelamis</i> | C | T | T | T  | C  | T  | C  | .  | C  | .  | T  | C  | A  | T  | A  | T  | T  | C   | T   | A   | .   | .   | .   | A   | .   | C   | T   | A   | C   | A   | C   | C   | G   | .   | C   |
| KP669145 | <i>Katsuwonos pelamis</i> | C | T | T | T  | C  | T  | C  | .  | C  | .  | T  | C  | A  | T  | A  | T  | T  | C   | .   | A   | .   | G   | .   | A   | .   | C   | T   | A   | C   | A   | C   | C   | .   | .   | C   |
| KP669144 | <i>Katsuwonos pelamis</i> | C | T | T | T  | C  | T  | C  | .  | C  | .  | T  | C  | A  | T  | A  | T  | T  | C   | .   | A   | .   | G   | .   | A   | .   | C   | T   | A   | C   | A   | C   | C   | .   | .   | C   |
| KP669143 | <i>Katsuwonos pelamis</i> | C | T | T | T  | C  | T  | A  | .  | C  | .  | T  | C  | A  | T  | A  | T  | T  | C   | .   | A   | .   | .   | .   | A   | .   | C   | T   | A   | C   | A   | C   | C   | G   | .   | C   |
| KP669142 | <i>Katsuwonos pelamis</i> | C | T | T | T  | C  | T  | C  | .  | C  | .  | T  | C  | A  | T  | A  | T  | T  | C   | .   | A   | .   | G   | .   | A   | .   | C   | T   | A   | C   | A   | C   | C   | .   | .   | C   |
| KP669141 | <i>Katsuwonos pelamis</i> | C | T | T | T  | C  | T  | C  | .  | C  | .  | T  | C  | A  | T  | A  | T  | T  | C   | T   | A   | .   | .   | .   | A   | .   | C   | T   | A   | C   | A   | C   | C   | G   | .   | C   |
| KP669140 | <i>Katsuwonos pelamis</i> | C | T | T | T  | C  | T  | C  | .  | C  | .  | T  | C  | A  | T  | A  | T  | T  | C   | T   | A   | .   | .   | .   | A   | .   | C   | T   | A   | C   | A   | C   | C   | .   | .   | C   |
| KP669139 | <i>Katsuwonos pelamis</i> | C | T | T | T  | C  | T  | C  | .  | C  | .  | T  | C  | A  | T  | A  | T  | T  | C   | .   | A   | .   | G   | .   | A   | .   | C   | T   | A   | C   | A   | C   | C   | .   | .   | C   |
| KP669138 | <i>Katsuwonos pelamis</i> | C | T | T | T  | C  | T  | C  | .  | C  | .  | T  | T  | A  | T  | A  | T  | T  | C   | .   | A   | .   | G   | .   | A   | .   | C   | T   | A   | C   | A   | C   | C   | .   | .   | C   |
| KP669137 | <i>Katsuwonos pelamis</i> | C | T | T | T  | C  | T  | C  | .  | C  | .  | T  | C  | A  | T  | A  | T  | T  | C   | T   | A   | .   | G   | .   | A   | .   | C   | T   | A   | C   | A   | C   | C   | .   | .   | C   |
| KP669136 | <i>Katsuwonos pelamis</i> | C | T | T | T  | C  | T  | C  | .  | C  | .  | C  | C  | A  | T  | A  | T  | T  | C   | .   | A   | .   | .   | A   | A   | .   | C   | T   | A   | C   | A   | C   | C   | G   | .   | C   |
| KP669135 | <i>Katsuwonos pelamis</i> | C | T | T | .  | C  | T  | C  | .  | C  | .  | T  | C  | A  | T  | A  | T  | T  | C   | T   | A   | .   | .   | .   | A   | .   | C   | T   | A   | C   | A   | C   | C   | G   | .   | C   |
| KP669134 | <i>Katsuwonos pelamis</i> | C | T | T | T  | C  | T  | C  | .  | C  | .  | T  | C  | A  | T  | A  | T  | T  | C   | .   | A   | .   | G   | .   | A   | .   | C   | T   | A   | C   | A   | C   | C   | G   | .   | C   |
| KP669133 | <i>Katsuwonos pelamis</i> | C | T | T | T  | C  | T  | C  | .  | C  | .  | T  | C  | A  | T  | A  | T  | T  | C   | .   | A   | .   | G   | .   | A   | .   | C   | T   | A   | C   | A   | C   | C   | G   | .   | C   |
| KP669132 | <i>Katsuwonos pelamis</i> | C | T | T | T  | C  | T  | C  | .  | C  | .  | T  | C  | A  | T  | A  | T  | T  | C   | .   | A   | .   | G   | .   | A   | .   | C   | T   | A   | C   | A   | C   | C   | .   | C   | C   |
| KP669131 | <i>Katsuwonos pelamis</i> | C | T | T | T  | C  | T  | C  | .  | C  | .  | T  | C  | A  | T  | A  | T  | T  | C   | T   | A   | .   | .   | .   | A   | .   | C   | T   | A   | C   | A   | C   | C   | G   | .   | C   |
| KP669130 | <i>Katsuwonos pelamis</i> | C | T | T | T  | C  | T  | C  | .  | C  | .  | T  | C  | A  | T  | A  | T  | T  | C   | .   | A   | .   | .   | .   | A   | .   | C   | T   | A   | C   | A   | C   | C   | .   | .   | C   |
| KP669129 | <i>Katsuwonos pelamis</i> | C | T | T | T  | C  | T  | C  | .  | C  | .  | T  | C  | A  | T  | A  | T  | T  | C   | .   | A   | .   | G   | .   | A   | .   | C   | T   | A   | C   | A   | C   | C   | G   | .   | C   |
| KP669128 | <i>Katsuwonos pelamis</i> | C | T | T | T  | C  | T  | C  | .  | C  | .  | T  | C  | A  | T  | A  | T  | T  | C   | .   | A   | .   | .   | .   | A   | .   | C   | T   | A   | C   | A   | C   | C   | .   | .   | C   |
| KP669127 | <i>Katsuwonos pelamis</i> | C | T | T | T  | C  | T  | C  | .  | C  | .  | T  | .  | A  | T  | A  | T  | T  | C   | T   | A   | .   | .   | .   | A   | .   | C   | T   | A   | C   | A   | C   | C   | G   | .   | C   |
| KP669126 | <i>Katsuwonos pelamis</i> | C | T | T | T  | C  | T  | C  | .  | C  | .  | T  | C  | A  | T  | A  | T  | T  | C   | T   | A   | .   | .   | .   | A   | .   | C   | T   | A   | C   | A   | C   | C   | .   | .   | C   |
| KP669125 | <i>Katsuwonos pelamis</i> | C | T | T | T  | C  | T  | C  | .  | C  | .  | T  | C  | A  | T  | A  | T  | .  | C   | T   | A   | .   | .   | .   | A   | .   | C   | T   | A   | C   | A   | C   | C   | G   | .   | C   |
| KP669124 | <i>Katsuwonos pelamis</i> | C | T | T | T  | C  | T  | C  | .  | C  | .  | T  | C  | A  | T  | A  | T  | T  | C   | T   | A   | .   | .   | .   | A   | .   | C   | T   | A   | C   | A   | C   | C   | G   | .   | C   |
| KP669123 | <i>Katsuwonos pelamis</i> | C | T | T | T  | C  | T  | C  | .  | C  | .  | T  | C  | A  | T  | A  | T  | T  | C   | T   | A   | .   | .   | .   | A   | .   | C   | T   | A   | C   | A   | C   | C   | .   | .   | C   |
| KP669122 | <i>Katsuwonos pelamis</i> | C | T | T | T  | C  | T  | C  | .  | C  | .  | T  | C  | A  | T  | A  | T  | T  | C   | T   | A   | .   | .   | .   | A   | .   | C   | T   | A   | C   | A   | C   | C   | G   | .   | C   |
| KP669121 | <i>Katsuwonos pelamis</i> | C | . | T | T  | C  | T  | C  | .  | C  | .  | T  | C  | A  | T  | A  | T  | T  | C   | .   | A   | .   | .   | .   | A   | .   | C   | T   | A   | C   | A   | C   | C   | G   | .   | C   |
| KP669120 | <i>Katsuwonos pelamis</i> | C | T | T | T  | C  | T  | C  | .  | C  | .  | T  | C  | A  | T  | A  | T  | T  | C   | .   | A   | .   | G   | .   | A   | .   | C   | T   | A   | C   | A   | C   | C   | G   | .   | C   |
| KP669119 | <i>Katsuwonos pelamis</i> | C | T | T | T  | C  | T  | C  | .  | C  | .  | T  | C  | A  | T  | A  | T  | T  | C   | .   | A   | .   | G   | .   | A   | .   | C   | T   | A   | C   | A   | C   | C   | .   | .   | C   |
| KP669118 | <i>Katsuwonos pelamis</i> | C | T | T | T  | C  | T  | C  | .  | C  | .  | T  | C  | A  | T  | A  | T  | T  | C   | .   | A   | .   | .   | .   | A   | .   | C   | T   | A   | C   | A   | C   | C   | G   | .   | C   |
| KP669117 | <i>Katsuwonos pelamis</i> | C | T | T | T  | C  | T  | C  | .  | C  | .  | C  | C  | A  | T  | A  | T  | T  | C   | .   | A   | .   | .   | .   | A   | .   | C   | T   | A   | C   | A   | C   | C   | G   | .   | C   |
| KP669116 | <i>Katsuwonos pelamis</i> | C | . | T | T  | C  | T  | C  | .  | C  | .  | T  | C  | A  | T  | A  | T  | T  | C   | .   | A   | .   | .   | .   | A   | .   | C   | T   | A   | C   | A   | C   | C   | .   | .   | C   |
| KP669115 | <i>Katsuwonos pelamis</i> | C | T | T | T  | C  | T  | C  | .  | C  | .  | T  | C  | A  | T  | A  | T  | T  | C   | T   | A   | .   | .   | A   | A   | .   | C   | T   | A   | C   | A   | C   | C   | .   | .   | .   |
| KP669114 | <i>Katsuwonos pelamis</i> | C | T | T | C  | C  | T  | C  | .  | C  | .  | T  | C  | A  | T  | A  | T  | T  | C   | T   | A   | .   | .   | .   | A   | .   | C   | T   | A   | C   | A   | C   | C   | G   | .   | C   |
| KP669113 | <i>Katsuwonos pelamis</i> | C | T | T | T  | C  | T  | C  | .  | C  | .  | T  | C  | A  | T  | A  | T  | T  | C   | T   | A   | .   | .   | .   | A   | .   | C   | T   | A   | C   | A   | C   | C   | .   | .   | C   |
| KP669112 | <i>Katsuwonos pelamis</i> | C | T | T | T  | C  | T  | C  | .  | C  | .  | T  | C  | A  | T  | A  | T  | T  | C   | .   | A   | .   | G   | .   | A   | .   | C   | T   | A   | C   | A   | C   | C   | .   | .   | C   |
| KP669111 | <i>Katsuwonos pelamis</i> | C | T | T | T  | C  | T  | C  | .  | C  | .  | T  | C  | A  | T  | A  | T  | T  | C   | T   | A   | .   | .   | .   | A   | .   | C   | T   | A   | C   | A   | C   | C   | G   | .   | C   |
| KP669110 | <i>Katsuwonos pelamis</i> | C | T | T | T  | C  | T  | C  | .  | C  | .  | T  | C  | A  | T  | A  | T  | T  | C   | .   | A   | .   | G   | .   | A   | .   | C   | T   | A   | C   | A   | C   | C   | G   | .   | C   |
| KP669109 | <i>Katsuwonos pelamis</i> | C | T | T | T  | C  | T  | C  | .  | C  | .  | T  | C  | A  | T  | A  | T  | T  | C   | .   | A   | .   | G   | .   | A   | .   | C   | T   | A   | C   | A   | C   | C   | .   | .   | C   |
| KP669108 | <i>Katsuwonos pelamis</i> | C | T | T | T  | C  | T  | C  | .  | C  | .  | T  | C  | A  | T  | A  | T  | T  | C   | .   | A   | .   | G   | .   | A   | .   | C   | T   | A   | C   | A   | C   | C   | G   | .   | C   |
| KP669107 | <i>Katsuwonos pelamis</i> | C | T | T | T  | C  | T  | C  | .  | C  | .  | T  | C  | A  | T  | A  | T  | T  | C   | .   | A   | .   | G   | .   | A   | .   | C   | T   | A   | C   | A   | C   | C   | G   | .   | C   |
| KP669106 | <i>Katsuwonos pelamis</i> | C | T | T | T  | C  | T  | C  | .  | C  | .  | T  | C  | A  | T  | A  | T  | T  | C   | .   | A   | .   | G   | .   | A   | .   | C   | T   | A   | C   | A   | C   | C   | .   | .   | C   |

## Supplementary Material

|          |                    | 2 | 6 | 9 | 18 | 21 | 30 | 33 | 36 | 39 | 45 | 63 | 69 | 72 | 75 | 84 | 93 | 96 | 102 | 105 | 111 | 120 | 123 | 129 | 132 | 144 | 156 | 162 | 174 | 180 | 183 | 192 | 198 | 213 | 219 | 231 |
|----------|--------------------|---|---|---|----|----|----|----|----|----|----|----|----|----|----|----|----|----|-----|-----|-----|-----|-----|-----|-----|-----|-----|-----|-----|-----|-----|-----|-----|-----|-----|-----|
| KP669105 | Katsuwonus pelamis | C | T | T | T  | C  | T  | C  | .  | C  | .  | T  | C  | A  | T  | A  | T  | T  | C   | .   | A   | .   | G   | .   | A   | .   | C   | T   | A   | C   | A   | C   | C   | .   | .   | C   |
| KP669104 | Katsuwonus pelamis | C | T | T | T  | C  | .  | C  | .  | C  | .  | T  | C  | A  | T  | A  | T  | T  | C   | T   | A   | .   | .   | .   | A   | .   | C   | T   | A   | C   | A   | C   | C   | .   | .   | C   |
| KP669103 | Katsuwonus pelamis | C | T | T | T  | C  | T  | C  | .  | C  | .  | T  | C  | A  | T  | A  | T  | T  | C   | .   | A   | .   | .   | .   | A   | .   | C   | T   | A   | C   | A   | C   | C   | .   | .   | C   |
| KP669102 | Katsuwonus pelamis | C | T | T | T  | C  | T  | C  | .  | C  | .  | T  | C  | A  | T  | A  | T  | T  | C   | .   | A   | .   | G   | .   | A   | .   | C   | T   | A   | C   | A   | C   | C   | .   | .   | C   |
| KP669101 | Katsuwonus pelamis | C | T | T | T  | .  | T  | C  | .  | C  | .  | T  | C  | A  | T  | A  | T  | T  | C   | T   | A   | .   | .   | .   | A   | .   | C   | T   | A   | C   | A   | C   | C   | G   | .   | C   |
| KP669100 | Katsuwonus pelamis | C | T | T | T  | C  | T  | C  | .  | C  | .  | T  | C  | A  | T  | A  | T  | T  | C   | .   | A   | .   | .   | .   | A   | .   | C   | T   | A   | C   | A   | C   | C   | .   | .   | C   |
| KJ617389 | Katsuwonus pelamis | C | T | T | T  | C  | T  | C  | .  | C  | .  | T  | C  | A  | T  | A  | T  | T  | C   | T   | A   | .   | .   | .   | A   | .   | A   | T   | A   | C   | A   | C   | C   | G   | .   | C   |
| KJ617388 | Katsuwonus pelamis | C | T | T | C  | C  | T  | C  | .  | C  | .  | T  | C  | A  | T  | A  | T  | T  | C   | T   | A   | .   | .   | .   | A   | .   | C   | T   | A   | C   | A   | C   | C   | G   | .   | C   |
| KJ617387 | Katsuwonus pelamis | C | T | T | T  | C  | T  | C  | .  | C  | .  | T  | C  | A  | T  | A  | T  | T  | C   | T   | A   | .   | .   | .   | A   | .   | C   | T   | A   | C   | A   | C   | C   | G   | .   | C   |
| KJ617386 | Katsuwonus pelamis | C | T | T | T  | C  | T  | C  | .  | C  | .  | T  | C  | A  | T  | A  | T  | T  | C   | T   | A   | .   | .   | .   | A   | .   | C   | T   | A   | C   | A   | C   | C   | .   | .   | C   |
| KJ617385 | Katsuwonus pelamis | C | . | T | T  | C  | T  | C  | .  | C  | .  | T  | C  | A  | T  | A  | T  | T  | C   | .   | A   | .   | .   | .   | A   | .   | C   | T   | A   | C   | A   | C   | C   | G   | .   | C   |
| KJ617384 | Katsuwonus pelamis | C | . | T | T  | C  | T  | C  | .  | C  | .  | T  | C  | A  | T  | A  | T  | T  | C   | .   | A   | .   | .   | .   | A   | .   | C   | T   | A   | C   | A   | C   | C   | G   | .   | C   |
| KJ617383 | Katsuwonus pelamis | C | . | T | T  | C  | T  | C  | .  | C  | .  | T  | C  | A  | T  | A  | T  | T  | C   | .   | A   | .   | .   | .   | A   | .   | C   | T   | A   | C   | A   | C   | C   | G   | .   | C   |
| KJ617382 | Katsuwonus pelamis | C | . | T | T  | C  | T  | C  | .  | C  | .  | T  | C  | A  | T  | A  | T  | T  | C   | .   | A   | .   | .   | .   | A   | .   | C   | T   | A   | C   | A   | C   | C   | G   | .   | C   |
| KJ617381 | Katsuwonus pelamis | C | . | T | T  | C  | .  | C  | .  | C  | .  | T  | C  | A  | T  | A  | T  | T  | C   | .   | A   | .   | .   | .   | A   | .   | C   | T   | A   | C   | A   | C   | C   | G   | .   | C   |
| KJ617380 | Katsuwonus pelamis | C | . | T | T  | C  | T  | C  | .  | C  | .  | T  | C  | A  | T  | A  | T  | T  | C   | .   | A   | .   | .   | .   | A   | .   | C   | T   | A   | C   | A   | C   | .   | G   | .   | C   |
| KJ617379 | Katsuwonus pelamis | C | . | T | T  | C  | T  | C  | .  | C  | .  | T  | C  | A  | T  | A  | T  | T  | C   | .   | A   | .   | .   | .   | A   | .   | C   | T   | A   | C   | A   | C   | C   | G   | .   | C   |
| KJ617378 | Katsuwonus pelamis | C | . | T | T  | C  | T  | C  | .  | C  | .  | T  | C  | A  | T  | A  | T  | T  | C   | .   | A   | .   | .   | .   | A   | .   | C   | T   | A   | C   | A   | C   | C   | G   | .   | C   |
| KJ617377 | Katsuwonus pelamis | C | . | T | T  | C  | T  | C  | .  | C  | .  | T  | C  | A  | T  | A  | T  | T  | C   | .   | A   | .   | .   | .   | A   | .   | C   | T   | A   | C   | A   | C   | C   | G   | .   | C   |
| KJ617376 | Katsuwonus pelamis | C | T | T | T  | C  | T  | C  | .  | C  | .  | T  | C  | A  | T  | A  | T  | T  | C   | .   | A   | .   | G   | .   | A   | .   | C   | T   | A   | C   | A   | C   | C   | .   | .   | C   |
| KJ617375 | Katsuwonus pelamis | C | T | T | T  | C  | T  | C  | .  | C  | .  | T  | C  | A  | T  | A  | T  | T  | C   | .   | A   | .   | .   | .   | A   | .   | C   | T   | A   | C   | A   | C   | C   | G   | .   | C   |
| KJ617374 | Katsuwonus pelamis | C | T | T | T  | C  | T  | C  | .  | C  | .  | T  | C  | A  | T  | A  | T  | T  | C   | .   | A   | .   | .   | .   | A   | .   | C   | T   | A   | C   | A   | C   | C   | G   | .   | C   |
| KJ617373 | Katsuwonus pelamis | C | T | T | T  | C  | T  | C  | .  | C  | .  | T  | C  | A  | T  | A  | T  | T  | C   | .   | A   | .   | G   | .   | A   | .   | C   | T   | A   | C   | A   | C   | C   | .   | .   | C   |
| KJ617372 | Katsuwonus pelamis | C | T | T | T  | C  | T  | C  | .  | C  | .  | T  | C  | A  | T  | A  | T  | T  | C   | .   | A   | .   | G   | .   | A   | .   | C   | T   | A   | C   | A   | C   | C   | G   | .   | C   |
| KJ617371 | Katsuwonus pelamis | C | T | T | T  | C  | T  | C  | .  | C  | .  | T  | C  | A  | T  | A  | T  | T  | C   | .   | A   | .   | .   | .   | A   | .   | C   | T   | A   | C   | A   | C   | C   | .   | .   | C   |
| KJ617370 | Katsuwonus pelamis | C | T | T | T  | C  | T  | C  | .  | C  | .  | T  | C  | A  | T  | A  | T  | T  | C   | .   | A   | .   | .   | .   | A   | .   | C   | T   | A   | C   | A   | C   | C   | .   | .   | C   |
| KJ617369 | Katsuwonus pelamis | C | T | T | T  | C  | T  | C  | .  | C  | .  | T  | C  | A  | T  | A  | T  | T  | C   | .   | A   | .   | G   | .   | A   | .   | C   | T   | A   | C   | A   | C   | .   | .   | .   | C   |
| KJ617368 | Katsuwonus pelamis | C | T | T | T  | C  | T  | C  | .  | C  | .  | T  | C  | A  | T  | A  | T  | T  | C   | .   | A   | .   | G   | .   | A   | .   | C   | T   | A   | C   | A   | C   | C   | .   | .   | C   |
| KJ617367 | Katsuwonus pelamis | C | T | T | T  | C  | T  | C  | .  | C  | .  | T  | C  | A  | T  | A  | T  | T  | C   | .   | A   | .   | G   | .   | A   | .   | C   | T   | A   | C   | A   | C   | C   | .   | .   | C   |
| KJ617366 | Katsuwonus pelamis | C | T | T | T  | C  | T  | C  | .  | C  | .  | T  | C  | A  | C  | A  | T  | T  | C   | .   | A   | .   | G   | .   | A   | .   | C   | T   | A   | C   | A   | C   | C   | .   | .   | C   |
| KJ617365 | Katsuwonus pelamis | C | T | T | T  | C  | T  | C  | .  | C  | .  | T  | C  | A  | T  | A  | T  | T  | C   | .   | A   | .   | G   | .   | A   | .   | C   | T   | A   | C   | A   | C   | C   | .   | .   | C   |
| KJ617364 | Katsuwonus pelamis | C | T | T | T  | C  | T  | C  | .  | C  | .  | T  | C  | A  | T  | A  | T  | T  | C   | .   | A   | .   | G   | .   | A   | .   | C   | T   | A   | C   | A   | C   | C   | .   | .   | C   |
| KJ617363 | Katsuwonus pelamis | C | T | T | T  | C  | T  | C  | .  | C  | .  | T  | C  | A  | T  | A  | T  | T  | C   | .   | A   | .   | G   | .   | A   | .   | C   | T   | A   | C   | A   | C   | C   | .   | .   | C   |
| KJ617362 | Katsuwonus pelamis | C | T | T | T  | C  | T  | C  | .  | C  | .  | T  | C  | A  | T  | A  | T  | T  | C   | .   | A   | .   | G   | .   | A   | .   | C   | T   | A   | C   | A   | C   | C   | G   | .   | C   |
| KJ617361 | Katsuwonus pelamis | C | . | T | T  | C  | T  | C  | .  | C  | .  | T  | C  | A  | T  | A  | T  | T  | C   | .   | A   | .   | G   | .   | A   | .   | C   | T   | A   | C   | A   | C   | C   | G   | .   | C   |
| KJ617360 | Katsuwonus pelamis | C | T | T | T  | C  | T  | C  | .  | C  | .  | T  | C  | A  | T  | A  | T  | T  | C   | .   | A   | .   | G   | .   | A   | .   | C   | T   | A   | C   | A   | C   | C   | .   | .   | C   |
| KJ617359 | Katsuwonus pelamis | C | T | T | T  | C  | T  | C  | .  | C  | .  | T  | C  | A  | T  | A  | T  | T  | C   | .   | A   | .   | G   | .   | A   | .   | C   | T   | A   | C   | A   | C   | C   | .   | .   | C   |
| KJ617358 | Katsuwonus pelamis | C | T | T | T  | C  | T  | C  | .  | C  | .  | T  | C  | A  | T  | A  | T  | T  | C   | .   | A   | .   | G   | .   | A   | .   | C   | T   | A   | C   | A   | C   | C   | .   | .   | C   |
| KJ617357 | Katsuwonus pelamis | C | T | T | T  | C  | T  | C  | .  | C  | .  | T  | C  | A  | T  | A  | T  | T  | C   | .   | A   | .   | G   | .   | A   | .   | C   | T   | A   | C   | A   | C   | C   | .   | .   | C   |
| KJ617356 | Katsuwonus pelamis | C | T | T | T  | C  | T  | C  | .  | C  | .  | T  | C  | A  | T  | A  | T  | T  | C   | .   | A   | .   | G   | .   | A   | .   | C   | T   | A   | C   | A   | C   | C   | .   | .   | C   |
| KJ617355 | Katsuwonus pelamis | C | . | T | T  | C  | T  | C  | .  | C  | .  | T  | C  | A  | T  | A  | T  | T  | C   | .   | A   | .   | G   | .   | A   | .   | C   | T   | G   | C   | A   | C   | C   | .   | .   | C   |
| KJ617354 | Katsuwonus pelamis | C | T | T | T  | C  | T  | C  | .  | C  | .  | T  | C  | A  | T  | A  | T  | T  | C   | .   | A   | .   | G   | .   | A   | .   | C   | T   | A   | C   | A   | C   | C   | .   | .   | C   |

## Supplementary Material

|          |                           | 2 | 6 | 9 | 18 | 21 | 30 | 33 | 36 | 39 | 45 | 63 | 69 | 72 | 75 | 84 | 93 | 96 | 102 | 105 | 111 | 120 | 123 | 129 | 132 | 144 | 156 | 162 | 174 | 180 | 183 | 192 | 198 | 213 | 219 | 231 |
|----------|---------------------------|---|---|---|----|----|----|----|----|----|----|----|----|----|----|----|----|----|-----|-----|-----|-----|-----|-----|-----|-----|-----|-----|-----|-----|-----|-----|-----|-----|-----|-----|
| KJ617353 | <i>Katsuwonus pelamis</i> | C | T | T | T  | C  | T  | C  | .  | C  | .  | T  | C  | A  | T  | A  | T  | T  | C   | .   | A   | .   | G   | .   | A   | .   | C   | T   | A   | C   | A   | C   | C   | G   | .   | C   |
| KJ617352 | <i>Katsuwonus pelamis</i> | C | T | T | T  | C  | T  | C  | .  | C  | .  | T  | C  | A  | T  | A  | T  | T  | C   | .   | A   | .   | G   | .   | A   | .   | C   | T   | A   | C   | A   | C   | C   | .   | .   | C   |
| KJ617351 | <i>Katsuwonus pelamis</i> | C | T | T | T  | C  | T  | C  | .  | C  | .  | T  | C  | A  | T  | A  | T  | T  | C   | .   | A   | .   | G   | .   | A   | .   | C   | .   | A   | C   | A   | C   | C   | .   | .   | C   |
| KJ617350 | <i>Katsuwonus pelamis</i> | C | T | T | T  | C  | T  | C  | .  | C  | .  | T  | C  | A  | T  | A  | T  | T  | C   | .   | A   | .   | G   | .   | A   | .   | C   | T   | A   | C   | A   | C   | C   | .   | .   | C   |
| KJ617349 | <i>Katsuwonus pelamis</i> | C | T | T | T  | C  | T  | C  | .  | C  | .  | T  | C  | A  | T  | A  | T  | T  | C   | .   | A   | .   | G   | .   | A   | .   | C   | T   | A   | C   | A   | C   | C   | .   | .   | C   |
| KJ617348 | <i>Katsuwonus pelamis</i> | C | T | T | T  | C  | T  | C  | .  | C  | .  | T  | C  | A  | T  | A  | T  | T  | C   | .   | A   | .   | G   | .   | A   | .   | C   | T   | A   | C   | A   | C   | C   | .   | .   | C   |
| KJ617347 | <i>Katsuwonus pelamis</i> | C | T | T | T  | C  | T  | C  | .  | C  | .  | T  | C  | A  | T  | A  | T  | T  | C   | .   | A   | .   | G   | .   | A   | .   | C   | T   | A   | C   | A   | C   | C   | .   | .   | C   |
| KJ617346 | <i>Katsuwonus pelamis</i> | C | T | T | T  | C  | T  | C  | .  | C  | .  | T  | C  | A  | T  | A  | T  | T  | C   | .   | A   | .   | G   | .   | A   | .   | C   | T   | A   | C   | A   | C   | C   | .   | .   | C   |
| KJ617345 | <i>Katsuwonus pelamis</i> | C | T | T | T  | C  | T  | C  | .  | C  | .  | T  | C  | A  | T  | A  | T  | T  | C   | .   | A   | .   | G   | .   | A   | .   | C   | T   | A   | C   | A   | C   | C   | .   | .   | C   |
| KJ617344 | <i>Katsuwonus pelamis</i> | C | T | T | T  | C  | T  | C  | .  | C  | .  | T  | C  | A  | T  | A  | T  | T  | C   | .   | A   | .   | G   | .   | A   | .   | C   | T   | A   | C   | A   | C   | C   | G   | .   | C   |
| KJ617343 | <i>Katsuwonus pelamis</i> | C | T | T | T  | C  | T  | C  | .  | C  | .  | T  | C  | A  | T  | A  | T  | T  | C   | .   | A   | .   | G   | .   | A   | .   | C   | T   | A   | C   | A   | C   | C   | .   | .   | C   |
| KJ617342 | <i>Katsuwonus pelamis</i> | C | T | T | T  | C  | T  | C  | .  | C  | .  | T  | C  | A  | T  | A  | T  | T  | C   | .   | A   | .   | .   | .   | A   | .   | C   | T   | A   | C   | A   | C   | C   | .   | .   | C   |
| KJ617341 | <i>Katsuwonus pelamis</i> | C | T | T | T  | C  | T  | C  | .  | C  | .  | T  | C  | A  | T  | A  | T  | T  | C   | .   | A   | .   | .   | .   | A   | .   | C   | T   | A   | C   | A   | C   | C   | .   | .   | C   |
| KJ617340 | <i>Katsuwonus pelamis</i> | C | T | T | T  | C  | T  | C  | .  | C  | .  | T  | C  | A  | T  | A  | T  | T  | C   | .   | A   | .   | .   | .   | A   | .   | C   | T   | A   | C   | A   | C   | C   | .   | .   | C   |
| KJ617339 | <i>Katsuwonus pelamis</i> | C | T | T | T  | C  | T  | C  | .  | C  | .  | T  | C  | A  | T  | A  | T  | T  | C   | .   | A   | .   | G   | .   | A   | .   | C   | T   | A   | C   | A   | C   | C   | .   | .   | C   |
| KJ617338 | <i>Katsuwonus pelamis</i> | C | T | T | T  | C  | T  | C  | .  | C  | .  | T  | C  | A  | T  | A  | T  | T  | C   | .   | A   | .   | G   | .   | A   | .   | C   | T   | A   | C   | A   | C   | C   | G   | .   | C   |
| KJ617337 | <i>Katsuwonus pelamis</i> | C | T | T | T  | C  | T  | C  | .  | C  | .  | T  | C  | A  | T  | A  | T  | T  | C   | .   | A   | .   | G   | .   | A   | .   | C   | T   | A   | C   | A   | C   | C   | .   | .   | C   |
| KJ617336 | <i>Katsuwonus pelamis</i> | C | T | T | T  | C  | T  | C  | .  | C  | .  | T  | C  | A  | T  | A  | T  | T  | C   | .   | A   | .   | G   | .   | A   | .   | C   | T   | A   | C   | A   | C   | C   | .   | .   | C   |
| KJ617335 | <i>Katsuwonus pelamis</i> | C | T | T | T  | C  | T  | C  | .  | C  | .  | T  | C  | A  | T  | A  | T  | T  | C   | .   | A   | .   | G   | .   | A   | .   | C   | T   | A   | C   | A   | C   | C   | .   | .   | C   |
| KJ617334 | <i>Katsuwonus pelamis</i> | C | T | T | T  | C  | T  | C  | .  | C  | .  | T  | C  | A  | T  | A  | T  | T  | C   | .   | A   | .   | G   | .   | A   | .   | C   | T   | A   | C   | A   | C   | C   | .   | .   | C   |
| KJ617333 | <i>Katsuwonus pelamis</i> | C | T | T | T  | C  | T  | C  | .  | C  | .  | T  | C  | A  | T  | A  | T  | T  | C   | .   | A   | .   | G   | .   | A   | .   | C   | T   | A   | C   | A   | C   | C   | .   | .   | C   |
| KJ617332 | <i>Katsuwonus pelamis</i> | C | T | T | T  | C  | T  | C  | .  | C  | .  | T  | C  | A  | T  | A  | T  | T  | C   | .   | A   | .   | G   | .   | A   | .   | C   | T   | A   | C   | A   | C   | C   | .   | .   | C   |
| KJ617331 | <i>Katsuwonus pelamis</i> | C | T | T | T  | C  | T  | C  | .  | C  | .  | T  | C  | A  | T  | A  | T  | T  | C   | .   | A   | .   | G   | .   | A   | .   | C   | T   | A   | C   | A   | C   | C   | .   | .   | C   |
| KJ617330 | <i>Katsuwonus pelamis</i> | C | T | T | T  | C  | T  | C  | .  | C  | .  | T  | C  | A  | T  | A  | T  | T  | C   | .   | A   | .   | G   | .   | A   | .   | C   | T   | A   | C   | A   | C   | C   | .   | .   | C   |
| KJ617329 | <i>Katsuwonus pelamis</i> | C | T | T | T  | C  | T  | C  | .  | C  | .  | T  | C  | G  | T  | A  | T  | T  | C   | .   | A   | .   | G   | .   | A   | .   | C   | T   | A   | C   | A   | C   | C   | .   | .   | C   |
| KJ617328 | <i>Katsuwonus pelamis</i> | C | T | T | T  | C  | T  | C  | .  | C  | .  | T  | C  | A  | T  | A  | T  | T  | C   | .   | A   | .   | G   | .   | A   | .   | C   | T   | A   | C   | A   | C   | C   | .   | .   | C   |
| KJ617327 | <i>Katsuwonus pelamis</i> | C | T | T | T  | C  | T  | C  | .  | C  | .  | T  | C  | A  | T  | A  | T  | T  | C   | .   | A   | .   | G   | .   | A   | .   | C   | T   | A   | C   | A   | C   | C   | G   | C   | C   |
| KJ617326 | <i>Katsuwonus pelamis</i> | C | T | T | T  | C  | T  | C  | .  | C  | .  | T  | C  | A  | T  | A  | T  | T  | C   | .   | A   | .   | G   | .   | A   | .   | C   | T   | A   | C   | A   | C   | C   | G   | .   | C   |
| KJ617325 | <i>Katsuwonus pelamis</i> | C | T | T | T  | C  | T  | C  | .  | C  | .  | T  | C  | A  | T  | A  | T  | T  | C   | .   | A   | .   | G   | .   | A   | .   | C   | T   | A   | C   | A   | C   | C   | G   | .   | C   |
| KJ617324 | <i>Katsuwonus pelamis</i> | C | T | T | T  | C  | T  | C  | .  | C  | .  | T  | C  | A  | T  | A  | T  | T  | C   | .   | A   | .   | G   | .   | A   | .   | C   | T   | A   | C   | A   | C   | C   | .   | .   | C   |
| KJ617323 | <i>Katsuwonus pelamis</i> | C | T | T | T  | C  | T  | C  | .  | C  | .  | T  | C  | A  | T  | A  | T  | T  | C   | .   | A   | .   | G   | .   | A   | .   | C   | T   | A   | C   | A   | C   | C   | G   | .   | C   |
| KJ617322 | <i>Katsuwonus pelamis</i> | C | T | T | T  | C  | T  | C  | .  | C  | .  | T  | C  | A  | T  | A  | T  | T  | C   | .   | A   | .   | G   | .   | A   | .   | C   | T   | A   | C   | A   | C   | C   | G   | .   | C   |
| KJ617321 | <i>Katsuwonus pelamis</i> | C | T | T | T  | C  | T  | C  | .  | C  | .  | T  | C  | A  | T  | A  | T  | T  | C   | .   | A   | .   | G   | .   | A   | .   | C   | T   | A   | C   | A   | C   | C   | .   | .   | C   |
| KJ617320 | <i>Katsuwonus pelamis</i> | C | T | T | T  | C  | T  | C  | .  | C  | .  | T  | C  | A  | T  | A  | T  | T  | C   | .   | A   | .   | G   | .   | A   | .   | C   | T   | A   | C   | A   | C   | C   | .   | .   | C   |
| KJ617319 | <i>Katsuwonus pelamis</i> | C | T | T | T  | C  | T  | C  | .  | C  | .  | T  | C  | A  | T  | A  | T  | T  | C   | .   | A   | .   | .   | .   | A   | .   | C   | T   | A   | C   | A   | C   | C   | .   | .   | C   |
| KJ617318 | <i>Katsuwonus pelamis</i> | C | T | T | T  | C  | T  | C  | .  | C  | .  | T  | C  | A  | T  | A  | T  | T  | C   | T   | A   | .   | G   | .   | A   | .   | C   | T   | A   | C   | A   | C   | C   | .   | .   | C   |
| KJ617317 | <i>Katsuwonus pelamis</i> | C | T | T | T  | C  | T  | C  | .  | C  | .  | T  | C  | A  | T  | A  | T  | T  | C   | .   | A   | .   | G   | .   | A   | .   | C   | T   | A   | C   | A   | C   | C   | .   | .   | C   |
| KJ617316 | <i>Katsuwonus pelamis</i> | C | . | T | T  | C  | T  | C  | .  | C  | .  | T  | C  | A  | T  | A  | T  | T  | C   | .   | A   | .   | G   | .   | A   | .   | C   | T   | A   | C   | A   | C   | C   | .   | .   | C   |
| KJ617315 | <i>Katsuwonus pelamis</i> | C | T | T | T  | C  | T  | C  | .  | C  | .  | T  | C  | A  | T  | A  | T  | T  | C   | .   | A   | .   | G   | .   | A   | .   | C   | T   | A   | C   | A   | C   | C   | .   | .   | C   |
| KJ617314 | <i>Katsuwonus pelamis</i> | C | T | T | T  | C  | T  | C  | .  | C  | .  | T  | C  | A  | T  | A  | T  | T  | C   | .   | A   | .   | G   | .   | A   | .   | C   | T   | A   | C   | A   | C   | C   | .   | .   | C   |
| KJ617313 | <i>Katsuwonus pelamis</i> | C | T | T | T  | C  | T  | C  | .  | C  | .  | T  | C  | A  | T  | A  | T  | T  | C   | .   | A   | .   | G   | .   | A   | .   | C   | T   | A   | C   | A   | C   | C   | .   | .   | C   |
| KJ617312 | <i>Katsuwonus pelamis</i> | C | T | T | T  | C  | T  | C  | .  | C  | .  | T  | C  | A  | T  | A  | T  | T  | C   | .   | A   | .   | G   | .   | A   | .   | C   | T   | A   | C   | A   | C   | C   | .   | .   | C   |

## Supplementary Material

|          |                           | 2 | 6 | 9 | 18 | 21 | 30 | 33 | 36 | 39 | 45 | 63 | 69 | 72 | 75 | 84 | 93 | 96 | 102 | 105 | 111 | 120 | 123 | 129 | 132 | 144 | 156 | 162 | 174 | 180 | 183 | 192 | 198 | 213 | 219 | 231 |     |
|----------|---------------------------|---|---|---|----|----|----|----|----|----|----|----|----|----|----|----|----|----|-----|-----|-----|-----|-----|-----|-----|-----|-----|-----|-----|-----|-----|-----|-----|-----|-----|-----|-----|
| KJ617311 | <i>Katsuwonus pelamis</i> | C | T | T | T  | C  | T  | C  | .  | C  | .  | T  | C  | A  | T  | A  | T  | T  | C   | .   | A   | .   | G   | .   | A   | .   | C   | T   | A   | C   | A   | C   | C   | .   | 213 | 219 | 231 |
| KJ617310 | <i>Katsuwonus pelamis</i> | C | T | T | T  | C  | T  | C  | .  | C  | .  | T  | C  | A  | T  | A  | T  | T  | C   | .   | A   | .   | .   | .   | A   | .   | C   | T   | A   | C   | A   | C   | C   | .   | .   | C   |     |
| KJ617309 | <i>Katsuwonus pelamis</i> | C | T | T | T  | C  | T  | C  | .  | C  | .  | T  | C  | A  | T  | A  | T  | T  | C   | .   | A   | .   | .   | .   | A   | .   | C   | T   | A   | C   | A   | C   | C   | .   | .   | C   |     |
| KJ617308 | <i>Katsuwonus pelamis</i> | C | T | T | T  | C  | T  | C  | .  | C  | .  | T  | C  | A  | T  | A  | T  | T  | C   | .   | A   | .   | .   | .   | A   | .   | C   | T   | A   | C   | A   | C   | C   | .   | .   | C   |     |
| KJ617307 | <i>Katsuwonus pelamis</i> | C | T | T | T  | C  | T  | C  | .  | C  | .  | T  | C  | A  | T  | A  | T  | T  | C   | .   | A   | .   | .   | .   | A   | .   | C   | T   | A   | C   | A   | C   | C   | .   | .   | C   |     |
| KJ617306 | <i>Katsuwonus pelamis</i> | C | T | T | T  | C  | .  | C  | .  | C  | .  | T  | C  | A  | T  | A  | T  | T  | C   | .   | A   | .   | .   | .   | A   | .   | C   | T   | A   | C   | A   | C   | C   | .   | .   | C   |     |
| KJ617305 | <i>Katsuwonus pelamis</i> | C | T | T | T  | C  | T  | C  | .  | C  | .  | T  | C  | A  | T  | A  | T  | T  | C   | .   | A   | .   | .   | .   | A   | .   | C   | T   | A   | C   | A   | C   | C   | .   | .   | C   |     |
| KJ617304 | <i>Katsuwonus pelamis</i> | C | T | T | T  | C  | T  | C  | .  | C  | .  | T  | C  | A  | T  | A  | T  | T  | C   | .   | A   | .   | .   | .   | A   | .   | C   | T   | A   | C   | A   | C   | C   | .   | .   | C   |     |
| KJ617303 | <i>Katsuwonus pelamis</i> | C | T | T | T  | C  | .  | A  | .  | C  | .  | T  | C  | A  | T  | A  | T  | T  | C   | .   | A   | .   | .   | .   | A   | .   | C   | T   | A   | C   | A   | C   | C   | G   | .   | C   |     |
| KJ617302 | <i>Katsuwonus pelamis</i> | C | T | T | T  | C  | T  | A  | .  | C  | .  | T  | T  | A  | T  | A  | T  | T  | C   | .   | A   | .   | .   | .   | A   | .   | C   | T   | A   | C   | A   | C   | C   | .   | .   | C   |     |
| KJ617301 | <i>Katsuwonus pelamis</i> | C | T | T | T  | C  | T  | C  | .  | C  | .  | T  | C  | A  | T  | A  | T  | T  | C   | .   | A   | .   | .   | .   | A   | .   | C   | T   | A   | C   | A   | C   | C   | G   | .   | C   |     |
| KJ617300 | <i>Katsuwonus pelamis</i> | C | T | T | T  | C  | T  | C  | .  | C  | .  | T  | C  | A  | T  | A  | T  | T  | C   | .   | A   | .   | .   | .   | A   | .   | C   | T   | A   | C   | A   | C   | C   | G   | .   | C   |     |
| KJ617299 | <i>Katsuwonus pelamis</i> | C | T | T | T  | C  | T  | C  | .  | C  | .  | T  | C  | A  | T  | A  | T  | T  | C   | T   | A   | .   | .   | .   | A   | .   | C   | T   | A   | C   | A   | C   | C   | .   | .   | C   |     |
| KJ617298 | <i>Katsuwonus pelamis</i> | C | T | T | T  | C  | T  | C  | .  | C  | .  | T  | C  | A  | T  | A  | T  | T  | C   | T   | A   | .   | .   | .   | A   | .   | C   | T   | A   | C   | A   | C   | C   | .   | C   | C   |     |
| KJ617297 | <i>Katsuwonus pelamis</i> | C | T | T | T  | C  | .  | C  | .  | C  | .  | T  | C  | A  | T  | A  | T  | T  | C   | T   | A   | .   | .   | .   | A   | .   | C   | T   | A   | C   | A   | C   | C   | .   | .   | C   |     |
| KJ617296 | <i>Katsuwonus pelamis</i> | C | T | T | T  | C  | T  | C  | .  | C  | .  | T  | C  | A  | T  | A  | T  | T  | C   | T   | A   | .   | .   | .   | A   | .   | C   | T   | A   | C   | A   | C   | C   | .   | .   | .   |     |
| KJ617295 | <i>Katsuwonus pelamis</i> | C | T | T | T  | C  | T  | C  | .  | C  | .  | T  | C  | A  | T  | A  | T  | T  | C   | T   | A   | .   | .   | .   | A   | .   | C   | T   | A   | C   | A   | C   | C   | G   | .   | C   |     |
| KJ617294 | <i>Katsuwonus pelamis</i> | C | T | T | T  | C  | T  | C  | .  | C  | .  | T  | C  | A  | T  | A  | T  | T  | C   | T   | A   | .   | .   | .   | A   | .   | C   | T   | G   | C   | A   | C   | C   | G   | .   | C   |     |
| KJ617293 | <i>Katsuwonus pelamis</i> | C | T | T | T  | C  | T  | C  | .  | C  | .  | T  | C  | A  | T  | A  | T  | T  | C   | T   | A   | .   | .   | .   | A   | .   | C   | T   | G   | C   | A   | C   | C   | .   | .   | C   |     |
| KJ617292 | <i>Katsuwonus pelamis</i> | C | T | T | T  | C  | T  | C  | .  | C  | .  | T  | C  | A  | T  | A  | T  | T  | C   | T   | A   | .   | .   | .   | A   | .   | C   | T   | A   | C   | A   | C   | C   | .   | .   | C   |     |
| KJ617291 | <i>Katsuwonus pelamis</i> | C | T | T | T  | C  | T  | C  | .  | C  | .  | T  | C  | A  | T  | A  | T  | T  | C   | T   | A   | .   | .   | .   | A   | .   | C   | T   | A   | C   | A   | C   | C   | .   | .   | C   |     |
| KJ617290 | <i>Katsuwonus pelamis</i> | C | T | T | T  | C  | T  | C  | .  | C  | .  | T  | C  | A  | T  | A  | T  | T  | C   | T   | A   | .   | .   | .   | A   | .   | C   | T   | A   | C   | A   | C   | C   | .   | .   | C   |     |
| KJ617289 | <i>Katsuwonus pelamis</i> | C | T | T | T  | C  | T  | C  | .  | C  | .  | T  | C  | A  | T  | A  | T  | T  | C   | T   | A   | .   | .   | .   | A   | .   | C   | T   | A   | C   | A   | C   | C   | .   | .   | C   |     |
| KJ617288 | <i>Katsuwonus pelamis</i> | C | T | T | T  | C  | T  | C  | .  | C  | .  | T  | C  | A  | T  | A  | T  | T  | C   | T   | A   | .   | .   | .   | A   | .   | C   | T   | A   | C   | A   | C   | C   | .   | .   | C   |     |
| KJ617287 | <i>Katsuwonus pelamis</i> | C | T | T | T  | C  | T  | C  | .  | C  | .  | T  | C  | A  | T  | A  | T  | T  | C   | T   | A   | .   | .   | .   | A   | .   | C   | T   | A   | C   | A   | C   | C   | G   | .   | C   |     |
| KJ617286 | <i>Katsuwonus pelamis</i> | C | T | T | .  | C  | T  | C  | .  | .  | .  | T  | C  | A  | T  | A  | T  | T  | C   | T   | A   | .   | .   | .   | A   | .   | C   | T   | A   | C   | A   | C   | C   | G   | .   | C   |     |
| KJ617285 | <i>Katsuwonus pelamis</i> | C | T | T | .  | C  | T  | C  | .  | C  | .  | T  | C  | A  | T  | A  | T  | T  | C   | T   | A   | .   | .   | .   | A   | .   | C   | T   | A   | C   | A   | C   | C   | G   | .   | C   |     |
| KJ617284 | <i>Katsuwonus pelamis</i> | C | T | T | .  | C  | T  | C  | .  | C  | .  | T  | C  | A  | T  | A  | T  | T  | C   | T   | A   | .   | .   | .   | G   | .   | C   | T   | A   | C   | A   | C   | C   | G   | .   | C   |     |
| KJ617283 | <i>Katsuwonus pelamis</i> | C | T | T | T  | C  | T  | C  | .  | C  | .  | T  | C  | A  | C  | A  | T  | T  | C   | T   | A   | .   | .   | .   | A   | .   | C   | T   | A   | C   | A   | C   | C   | G   | .   | C   |     |
| KJ617282 | <i>Katsuwonus pelamis</i> | C | T | T | T  | C  | T  | C  | .  | C  | .  | T  | C  | A  | C  | A  | T  | T  | C   | T   | A   | .   | .   | .   | A   | .   | C   | T   | A   | C   | A   | C   | C   | G   | .   | C   |     |
| KJ617281 | <i>Katsuwonus pelamis</i> | C | T | T | T  | C  | T  | C  | .  | C  | .  | T  | C  | A  | T  | A  | T  | T  | C   | T   | A   | .   | .   | .   | A   | .   | C   | T   | A   | C   | A   | C   | C   | G   | .   | C   |     |
| KJ617280 | <i>Katsuwonus pelamis</i> | C | T | T | T  | C  | T  | C  | .  | C  | .  | T  | C  | A  | T  | A  | T  | T  | C   | T   | A   | .   | .   | .   | A   | .   | C   | T   | A   | C   | A   | C   | C   | G   | .   | C   |     |
| KJ617279 | <i>Katsuwonus pelamis</i> | C | T | T | T  | C  | T  | C  | .  | C  | .  | T  | C  | A  | T  | A  | T  | T  | C   | T   | A   | .   | .   | .   | A   | .   | C   | T   | A   | C   | A   | C   | C   | G   | .   | C   |     |
| KJ617278 | <i>Katsuwonus pelamis</i> | C | . | T | C  | C  | T  | C  | .  | C  | .  | T  | C  | A  | T  | A  | T  | T  | C   | T   | A   | .   | .   | .   | A   | .   | C   | T   | A   | C   | A   | C   | C   | G   | .   | C   |     |
| KJ617277 | <i>Katsuwonus pelamis</i> | C | T | T | T  | C  | T  | C  | .  | C  | .  | T  | C  | A  | T  | A  | T  | T  | C   | T   | A   | .   | .   | .   | A   | .   | C   | T   | A   | C   | A   | C   | C   | G   | .   | C   |     |
| KJ617276 | <i>Katsuwonus pelamis</i> | C | T | T | T  | C  | T  | C  | .  | C  | .  | T  | C  | A  | T  | A  | T  | T  | C   | T   | A   | .   | .   | .   | A   | .   | C   | T   | A   | C   | A   | C   | C   | G   | .   | C   |     |
| KJ617275 | <i>Katsuwonus pelamis</i> | C | T | T | T  | C  | T  | C  | .  | C  | .  | T  | C  | A  | T  | A  | T  | T  | C   | T   | A   | .   | .   | .   | A   | .   | C   | T   | A   | C   | A   | C   | C   | G   | .   | C   |     |
| KJ617274 | <i>Katsuwonus pelamis</i> | C | T | T | T  | C  | T  | C  | .  | C  | .  | T  | C  | A  | T  | A  | T  | T  | C   | T   | A   | .   | .   | .   | A   | .   | C   | T   | A   | C   | A   | C   | C   | G   | .   | C   |     |
| KJ617273 | <i>Katsuwonus pelamis</i> | C | T | T | T  | C  | T  | C  | .  | C  | .  | T  | C  | A  | T  | A  | T  | T  | C   | T   | A   | .   | .   | .   | A   | .   | C   | T   | A   | C   | A   | C   | C   | G   | .   | C   |     |
| KJ617272 | <i>Katsuwonus pelamis</i> | C | T | T | T  | C  | T  | C  | .  | C  | .  | T  | C  | A  | T  | A  | T  | T  | C   | T   | A   | .   | .   | .   | A   | .   | C   | T   | A   | C   | A   | C   | C   | G   | .   | C   |     |
| KJ617271 | <i>Katsuwonus pelamis</i> | C | T | T | T  | C  | T  | C  | .  | C  | .  | T  | C  | A  | T  | A  | T  | T  | C   | T   | A   | .   | .   | .   | A   | .   | C   | T   | A   | C   | A   | C   | C   | G   | .   | C   |     |
| KJ617270 | <i>Katsuwonus pelamis</i> | C | T | T | T  | C  | .  | C  | .  | C  | .  | T  | C  | A  | T  | A  | T  | T  | C   | T   | A   | .   | .   | .   | A   | .   | C   | T   | A   | C   | A   | C   | C   | .   | .   | C   |     |



# Supplementary Material

|             |                           | 2 | 6 | 9 | 18 | 21 | 30 | 33 | 36 | 39 | 45 | 63 | 69 | 72 | 75 | 84 | 93 | 96 | 102 | 105 | 111 | 120 | 123 | 129 | 132 | 144 | 156 | 162 | 174 | 180 | 183 | 192 | 198 | 213 | 219 | 231 |
|-------------|---------------------------|---|---|---|----|----|----|----|----|----|----|----|----|----|----|----|----|----|-----|-----|-----|-----|-----|-----|-----|-----|-----|-----|-----|-----|-----|-----|-----|-----|-----|-----|
| KJ617269    | <i>Katsuwonos pelamis</i> | C | T | T | T  | C  | T  | C  | .  | C  | .  | T  | C  | A  | T  | A  | T  | T  | C   | T   | A   | .   | .   | .   | A   | .   | C   | T   | A   | C   | A   | C   | C   | .   | .   | C   |
| KJ617268    | <i>Katsuwonos pelamis</i> | C | T | T | T  | C  | T  | C  | .  | C  | .  | T  | C  | A  | T  | A  | T  | T  | C   | T   | A   | .   | .   | .   | A   | .   | C   | T   | A   | C   | A   | C   | C   | .   | .   | C   |
| KJ617267    | <i>Katsuwonos pelamis</i> | C | T | T | T  | C  | T  | C  | .  | C  | .  | T  | C  | A  | T  | A  | T  | T  | C   | T   | A   | .   | .   | .   | A   | .   | C   | T   | A   | C   | A   | C   | C   | G   | .   | C   |
| KJ617266    | <i>Katsuwonos pelamis</i> | C | T | T | T  | C  | T  | C  | .  | C  | .  | T  | C  | A  | T  | A  | T  | T  | C   | T   | A   | .   | .   | .   | A   | .   | C   | T   | A   | C   | A   | C   | C   | .   | .   | C   |
| KJ617265    | <i>Katsuwonos pelamis</i> | C | T | T | T  | C  | T  | C  | .  | C  | .  | T  | C  | A  | T  | A  | T  | T  | C   | T   | A   | .   | .   | .   | A   | .   | C   | T   | A   | C   | A   | C   | C   | .   | .   | C   |
| KJ617264    | <i>Katsuwonos pelamis</i> | C | T | T | T  | C  | T  | C  | .  | .  | .  | T  | C  | A  | T  | A  | T  | T  | C   | T   | A   | .   | .   | .   | A   | .   | C   | T   | A   | C   | A   | C   | C   | G   | .   | C   |
| KJ617263    | <i>Katsuwonos pelamis</i> | C | T | T | T  | C  | T  | C  | .  | C  | .  | T  | C  | A  | T  | A  | T  | T  | C   | T   | A   | .   | .   | .   | A   | .   | C   | T   | A   | C   | A   | C   | C   | .   | .   | C   |
| KJ617262    | <i>Katsuwonos pelamis</i> | C | T | T | T  | C  | T  | C  | .  | C  | .  | T  | C  | A  | T  | A  | T  | T  | C   | T   | A   | .   | .   | .   | A   | .   | C   | T   | A   | C   | A   | C   | C   | G   | .   | C   |
| KJ617261    | <i>Katsuwonos pelamis</i> | C | T | T | T  | C  | T  | C  | .  | C  | .  | T  | C  | A  | T  | A  | T  | T  | C   | T   | A   | .   | .   | .   | A   | .   | C   | T   | A   | C   | A   | C   | C   | G   | .   | C   |
| KJ617260    | <i>Katsuwonos pelamis</i> | C | T | T | .  | C  | T  | C  | .  | C  | .  | T  | C  | A  | T  | A  | T  | T  | C   | T   | A   | .   | .   | .   | A   | .   | C   | T   | A   | C   | A   | C   | C   | G   | .   | C   |
| KJ617259    | <i>Katsuwonos pelamis</i> | C | T | T | T  | C  | T  | C  | .  | C  | .  | T  | C  | A  | T  | A  | T  | T  | C   | T   | A   | .   | .   | .   | A   | .   | C   | T   | A   | C   | A   | C   | C   | G   | .   | C   |
| KJ617258    | <i>Katsuwonos pelamis</i> | C | T | T | T  | C  | T  | C  | .  | C  | .  | T  | C  | A  | T  | A  | T  | T  | C   | T   | A   | .   | .   | .   | A   | .   | C   | T   | A   | C   | A   | C   | C   | G   | .   | C   |
| DQ497840    | <i>Katsuwonos pelamis</i> | C | T | T | T  | C  | T  | C  | .  | C  | .  | T  | C  | A  | T  | A  | T  | T  | C   | T   | A   | .   | .   | .   | A   | .   | C   | T   | A   | C   | A   | C   | C   | .   | .   | C   |
| DQ497839    | <i>Katsuwonos pelamis</i> | C | T | T | T  | C  | T  | C  | .  | C  | .  | T  | C  | A  | T  | A  | T  | T  | C   | T   | A   | .   | .   | .   | A   | .   | C   | T   | A   | C   | A   | C   | C   | .   | .   | C   |
| DQ497838    | <i>Katsuwonos pelamis</i> | C | T | T | T  | C  | T  | C  | .  | C  | .  | T  | C  | A  | T  | A  | T  | T  | C   | .   | A   | .   | G   | .   | A   | .   | C   | T   | A   | C   | A   | C   | C   | .   | .   | C   |
| DQ080321    | <i>Katsuwonos pelamis</i> | C | . | T | T  | C  | T  | C  | .  | C  | .  | T  | C  | A  | T  | A  | T  | T  | C   | .   | A   | .   | .   | .   | A   | .   | C   | T   | A   | C   | A   | C   | C   | G   | .   | C   |
| DQ080320    | <i>Katsuwonos pelamis</i> | C | T | T | T  | C  | T  | C  | .  | C  | .  | T  | C  | A  | T  | A  | T  | T  | C   | .   | A   | .   | G   | .   | A   | .   | C   | T   | A   | C   | A   | C   | C   | G   | .   | C   |
| DQ080319    | <i>Katsuwonos pelamis</i> | C | T | T | T  | C  | T  | C  | .  | C  | .  | T  | C  | A  | T  | A  | T  | T  | C   | .   | A   | .   | .   | .   | A   | .   | C   | T   | A   | C   | A   | C   | C   | .   | .   | C   |
| DQ080318    | <i>Katsuwonos pelamis</i> | C | T | T | T  | C  | T  | C  | .  | C  | .  | T  | C  | A  | T  | A  | T  | T  | C   | .   | A   | .   | .   | .   | A   | .   | C   | T   | A   | C   | A   | C   | C   | G   | .   | C   |
| DQ080317    | <i>Katsuwonos pelamis</i> | C | T | T | T  | C  | T  | C  | .  | C  | .  | T  | C  | A  | T  | A  | T  | T  | C   | .   | A   | .   | G   | .   | A   | .   | C   | T   | A   | C   | A   | C   | C   | .   | .   | C   |
| DQ080316    | <i>Katsuwonos pelamis</i> | C | T | T | T  | C  | T  | C  | .  | C  | .  | T  | C  | A  | T  | A  | T  | T  | C   | .   | A   | .   | .   | .   | A   | .   | C   | T   | A   | C   | A   | C   | C   | .   | .   | C   |
| DQ080315    | <i>Katsuwonos pelamis</i> | C | T | T | T  | C  | T  | C  | .  | C  | .  | T  | C  | A  | T  | A  | T  | T  | C   | .   | A   | .   | G   | .   | A   | .   | C   | T   | A   | C   | A   | C   | C   | .   | .   | C   |
| EU250983    | <i>Katsuwonos pelamis</i> | C | T | T | T  | C  | T  | C  | .  | C  | .  | T  | C  | A  | T  | A  | T  | T  | C   | .   | A   | .   | G   | .   | A   | .   | C   | T   | A   | C   | A   | C   | C   | .   | .   | C   |
| EU250981    | <i>Katsuwonos pelamis</i> | C | T | T | T  | C  | T  | C  | .  | C  | .  | T  | C  | A  | T  | A  | T  | T  | C   | .   | A   | .   | G   | .   | A   | .   | C   | .   | A   | C   | A   | C   | C   | .   | .   | C   |
| KU904414    | <i>Katsuwonos pelamis</i> | C | T | T | T  | C  | T  | C  | .  | C  | .  | T  | C  | A  | T  | A  | T  | T  | C   | .   | A   | .   | .   | .   | A   | .   | C   | T   | A   | C   | A   | C   | C   | .   | .   | C   |
| EU250982    | <i>Katsuwonos pelamis</i> | C | T | T | T  | C  | T  | C  | .  | C  | .  | T  | C  | A  | T  | A  | T  | T  | C   | .   | A   | .   | G   | .   | A   | .   | C   | T   | A   | C   | A   | C   | C   | .   | .   | C   |
| EU250975    | <i>Katsuwonos pelamis</i> | C | T | T | T  | C  | T  | C  | .  | C  | .  | T  | C  | A  | T  | A  | T  | T  | C   | T   | A   | .   | .   | .   | A   | .   | C   | T   | A   | C   | A   | C   | C   | G   | .   | C   |
| EU250974    | <i>Katsuwonos pelamis</i> | C | T | T | T  | C  | T  | C  | .  | C  | .  | T  | C  | A  | T  | A  | T  | T  | C   | .   | A   | .   | G   | .   | A   | .   | C   | T   | A   | C   | A   | C   | C   | G   | .   | C   |
| EU250976    | <i>Katsuwonos pelamis</i> | C | . | T | T  | C  | T  | C  | .  | C  | .  | T  | C  | A  | T  | A  | T  | T  | C   | .   | A   | .   | G   | .   | A   | .   | C   | T   | G   | C   | A   | C   | C   | .   | .   | C   |
| EU250967    | <i>Katsuwonos pelamis</i> | C | T | T | T  | C  | T  | C  | .  | C  | .  | T  | C  | A  | T  | A  | T  | T  | C   | T   | A   | .   | .   | .   | A   | .   | C   | T   | A   | C   | A   | C   | C   | G   | .   | C   |
| AB101290    | <i>Katsuwonos pelamis</i> | C | . | T | T  | C  | T  | C  | .  | C  | .  | T  | C  | A  | T  | A  | T  | T  | C   | T   | A   | .   | .   | .   | A   | .   | C   | T   | A   | C   | A   | C   | C   | .   | .   | C   |
| EU250966    | <i>Katsuwonos pelamis</i> | C | T | T | T  | .  | T  | C  | .  | C  | .  | T  | C  | A  | T  | A  | T  | T  | C   | .   | A   | .   | G   | .   | A   | .   | C   | T   | A   | C   | A   | C   | C   | .   | .   | C   |
| NC 005316   | <i>Katsuwonos pelamis</i> | C | . | T | T  | C  | T  | C  | .  | C  | .  | T  | C  | A  | T  | A  | T  | T  | C   | T   | A   | .   | .   | .   | A   | .   | C   | T   | A   | C   | A   | C   | C   | .   | .   | C   |
| GU256527    | <i>Katsuwonos pelamis</i> | C | T | T | T  | C  | T  | C  | .  | C  | .  | T  | C  | A  | T  | A  | T  | T  | C   | T   | A   | .   | .   | .   | A   | .   | C   | T   | A   | C   | A   | C   | C   | .   | .   | C   |
| EF141175    | <i>Katsuwonos pelamis</i> | C | T | T | T  | C  | T  | C  | .  | C  | .  | T  | C  | A  | T  | A  | T  | T  | C   | .   | A   | .   | G   | .   | A   | .   | C   | T   | A   | C   | A   | C   | C   | .   | .   | C   |
| JN086155    | <i>Katsuwonos pelamis</i> | C | T | T | T  | C  | T  | C  | .  | C  | .  | T  | C  | A  | T  | A  | T  | T  | C   | T   | A   | .   | .   | .   | A   | .   | C   | T   | A   | C   | A   | C   | C   | .   | .   | C   |
| KM605252    | <i>Katsuwonos pelamis</i> | C | T | T | T  | C  | T  | C  | .  | C  | .  | T  | C  | A  | T  | A  | T  | T  | C   | .   | A   | .   | .   | .   | A   | .   | C   | T   | A   | C   | A   | C   | C   | G   | .   | C   |
| SKJ-AO-L1-1 |                           | C | T | T | T  | C  | T  | C  | .  | C  | .  | T  | C  | A  | T  | A  | T  | T  | C   | T   | A   | .   | .   | .   | A   | .   | C   | T   | A   | C   | A   | C   | C   | G   | .   | C   |
| SKJ-AO-L1-2 |                           | C | T | T | T  | C  | T  | C  | .  | C  | .  | T  | C  | A  | T  | A  | T  | T  | C   | .   | A   | .   | .   | .   | A   | .   | C   | T   | A   | C   | A   | C   | C   | .   | .   | C   |
| SKJ-AO-L1-3 |                           | C | T | T | T  | C  | T  | C  | .  | C  | .  | T  | C  | A  | C  | A  | T  | T  | C   | T   | A   | .   | .   | .   | A   | .   | C   | T   | A   | C   | A   | C   | C   | G   | .   | C   |
| SKJ-IO-L1-1 |                           | C | T | T | T  | C  | T  | C  | .  | C  | .  | T  | C  | A  | T  | A  | T  | T  | C   | .   | A   | .   | G   | .   | A   | .   | C   | T   | A   | C   | A   | C   | C   | G   | .   | C   |
| SKJ-IO-L1-2 |                           | C | T | T | T  | C  | T  | C  | .  | C  | .  | T  | C  | A  | T  | A  | T  | T  | C   | T   | A   | .   | .   | .   | A   | .   | C   | T   | A   | C   | A   | C   | C   | G   | .   | C   |

# Supplementary Material

|           |                        | 2 | 6 | 9 | 18 | 21 | 30 | 33 | 36 | 39 | 45 | 63 | 69 | 72 | 75 | 84 | 93 | 96 | 102 | 105 | 111 | 120 | 123 | 129 | 132 | 144 | 156 | 162 | 174 | 180 | 183 | 192 | 198 | 213 | 219 | 231 |
|-----------|------------------------|---|---|---|----|----|----|----|----|----|----|----|----|----|----|----|----|----|-----|-----|-----|-----|-----|-----|-----|-----|-----|-----|-----|-----|-----|-----|-----|-----|-----|-----|
|           | SKJ-IO-L1-3            | C | T | T | T  | C  | T  | C  | .  | C  | .  | T  | C  | A  | T  | A  | T  | T  | C   | .   | A   | .   | G   | .   | A   | .   | C   | T   | A   | C   | A   | C   | C   | G   | .   | C   |
|           | SKJ-WCPO-L1-1          | C | T | T | T  | C  | T  | C  | .  | C  | .  | T  | C  | A  | T  | A  | T  | T  | C   | T   | A   | .   | .   | .   | A   | .   | C   | T   | A   | C   | A   | C   | C   | G   | C   | C   |
|           | SKJ-WCPO-L1-2          | C | T | T | T  | C  | T  | C  | .  | C  | .  | T  | C  | A  | T  | A  | T  | T  | C   | .   | A   | .   | .   | .   | A   | .   | C   | T   | A   | C   | A   | C   | C   | .   | C   | C   |
|           | SKJ-WCPO-L1-3          | C | T | T | T  | C  | T  | C  | .  | C  | .  | T  | C  | A  | T  | A  | T  | T  | C   | .   | A   | .   | G   | .   | A   | .   | C   | T   | A   | C   | A   | C   | C   | .   | .   | C   |
|           | SKJ-EPO-L1-1           | C | T | T | T  | C  | T  | C  | .  | C  | .  | T  | C  | A  | T  | A  | T  | T  | C   | T   | A   | .   | .   | .   | A   | .   | C   | T   | A   | C   | A   | C   | C   | .   | C   | C   |
|           | SKJ-EPO-L1-2           | C | T | T | T  | C  | T  | C  | .  | C  | .  | T  | C  | A  | T  | A  | T  | T  | C   | .   | A   | .   | .   | .   | A   | .   | C   | T   | A   | C   | A   | C   | C   | .   | C   | C   |
|           | SKJ-EPO-L1-3           | C | T | T | T  | C  | T  | C  | .  | C  | .  | T  | C  | A  | T  | A  | T  | T  | C   | .   | A   | .   | G   | .   | A   | .   | C   | T   | A   | C   | A   | C   | C   | .   | C   | C   |
| MG017702  | <i>Thunnus tonggol</i> | . | . | . | .  | .  | .  | .  | T  | .  | .  | .  | .  | .  | T  | .  | .  | .  | .   | .   | .   | G   | .   | .   | .   | .   | .   | T   | .   | .   | .   | .   | .   | .   | .   | .   |
| DQ497920  | <i>Thunnus tonggol</i> | . | . | . | .  | .  | .  | .  | T  | .  | .  | .  | .  | .  | T  | .  | .  | .  | .   | .   | .   | G   | .   | .   | .   | .   | .   | T   | .   | .   | .   | .   | .   | .   | .   | .   |
| DQ497919  | <i>Thunnus tonggol</i> | . | . | . | .  | .  | .  | .  | T  | .  | .  | .  | .  | .  | T  | .  | .  | .  | .   | .   | .   | G   | .   | .   | .   | .   | .   | T   | .   | .   | .   | .   | .   | .   | .   | .   |
| DQ497918  | <i>Thunnus tonggol</i> | . | . | . | .  | .  | .  | .  | T  | .  | .  | .  | .  | .  | T  | .  | .  | .  | .   | .   | .   | G   | .   | A   | .   | .   | .   | T   | .   | .   | .   | .   | .   | .   | .   | .   |
| DQ497917  | <i>Thunnus tonggol</i> | . | . | . | .  | .  | .  | .  | T  | .  | .  | .  | .  | .  | T  | .  | .  | .  | .   | .   | .   | G   | .   | A   | .   | .   | .   | T   | .   | .   | .   | .   | .   | .   | .   | .   |
| DQ497916  | <i>Thunnus tonggol</i> | . | . | . | .  | .  | .  | .  | T  | .  | .  | .  | .  | .  | T  | .  | .  | .  | .   | .   | .   | G   | .   | .   | .   | .   | .   | T   | .   | .   | .   | .   | .   | C   | .   | .   |
| DQ497915  | <i>Thunnus tonggol</i> | . | . | . | .  | .  | .  | .  | T  | .  | .  | .  | .  | .  | T  | .  | .  | .  | .   | .   | .   | G   | .   | .   | .   | .   | .   | T   | .   | .   | .   | .   | .   | .   | .   | .   |
| EU935788  | <i>Thunnus tonggol</i> | . | . | . | .  | .  | .  | .  | T  | .  | .  | .  | .  | .  | T  | .  | .  | .  | .   | .   | .   | G   | .   | .   | .   | .   | .   | T   | .   | .   | .   | .   | .   | .   | .   | .   |
| EU935787  | <i>Thunnus tonggol</i> | . | . | . | .  | .  | .  | .  | T  | .  | .  | .  | .  | .  | T  | .  | .  | .  | .   | .   | .   | G   | .   | .   | .   | .   | .   | T   | .   | .   | .   | .   | .   | .   | .   | .   |
| EU935786  | <i>Thunnus tonggol</i> | . | . | . | .  | .  | .  | .  | T  | .  | .  | .  | .  | .  | T  | .  | .  | .  | .   | .   | .   | G   | .   | .   | .   | .   | .   | T   | .   | .   | .   | .   | .   | .   | .   | .   |
| EU935785  | <i>Thunnus tonggol</i> | . | . | . | .  | .  | .  | .  | T  | .  | .  | .  | .  | .  | T  | .  | .  | .  | .   | .   | .   | G   | .   | .   | .   | .   | .   | T   | .   | .   | .   | .   | .   | .   | .   | .   |
| EU349415  | <i>Thunnus tonggol</i> | . | . | . | .  | .  | .  | .  | T  | .  | .  | .  | .  | .  | T  | .  | .  | .  | .   | .   | .   | G   | .   | .   | .   | .   | .   | T   | .   | .   | .   | .   | .   | .   | .   | .   |
| EU349414  | <i>Thunnus tonggol</i> | . | . | . | .  | .  | .  | .  | T  | .  | .  | .  | .  | .  | T  | .  | .  | .  | .   | .   | .   | G   | .   | .   | .   | .   | .   | T   | .   | .   | .   | .   | .   | .   | .   | .   |
| EU349413  | <i>Thunnus tonggol</i> | . | . | . | .  | .  | .  | .  | T  | .  | .  | .  | .  | .  | T  | .  | .  | .  | .   | .   | .   | G   | .   | .   | .   | .   | .   | T   | .   | .   | .   | .   | .   | .   | .   | .   |
| DQ497914  | <i>Thunnus tonggol</i> | . | . | . | .  | .  | .  | .  | T  | .  | .  | .  | .  | .  | T  | .  | .  | .  | .   | .   | .   | G   | .   | .   | .   | .   | .   | T   | .   | .   | .   | .   | .   | .   | .   | .   |
| DQ497913  | <i>Thunnus tonggol</i> | . | . | . | .  | .  | .  | .  | T  | .  | .  | .  | .  | .  | T  | .  | .  | .  | .   | .   | .   | G   | .   | .   | .   | .   | .   | T   | .   | .   | .   | .   | .   | .   | .   | .   |
| EF141181  | <i>Thunnus tonggol</i> | . | . | . | .  | .  | .  | .  | T  | .  | .  | .  | .  | .  | T  | .  | .  | .  | .   | .   | .   | G   | .   | .   | .   | .   | .   | T   | .   | .   | .   | .   | .   | .   | .   | .   |
| KM055411  | <i>Thunnus tonggol</i> | . | . | . | .  | .  | .  | .  | T  | .  | .  | .  | .  | .  | T  | .  | .  | .  | .   | .   | .   | G   | .   | .   | .   | .   | .   | T   | .   | .   | .   | .   | .   | .   | .   | .   |
| EU349412  | <i>Thunnus tonggol</i> | . | . | . | .  | .  | .  | .  | T  | .  | .  | .  | .  | .  | T  | .  | .  | .  | .   | .   | .   | G   | .   | .   | .   | .   | .   | T   | .   | .   | .   | .   | .   | .   | .   | .   |
| EU935790  | <i>Thunnus tonggol</i> | . | . | . | .  | .  | .  | .  | T  | .  | .  | .  | .  | .  | T  | .  | .  | .  | .   | .   | .   | G   | .   | .   | .   | .   | .   | T   | .   | .   | .   | .   | .   | .   | .   | .   |
| EU935789  | <i>Thunnus tonggol</i> | . | . | . | .  | .  | .  | .  | T  | .  | .  | .  | .  | .  | T  | .  | .  | .  | .   | .   | .   | G   | .   | .   | .   | .   | .   | T   | .   | .   | .   | .   | .   | .   | .   | .   |
| KC522359  | <i>Thunnus tonggol</i> | . | . | . | C  | .  | .  | .  | .  | .  | .  | .  | .  | .  | A  | .  | .  | .  | .   | .   | .   | .   | .   | .   | .   | .   | .   | T   | .   | .   | .   | .   | C   | .   | .   | C   |
| HQ425780  | <i>Thunnus tonggol</i> | . | . | . | C  | .  | .  | .  | .  | .  | .  | .  | .  | .  | A  | .  | .  | .  | .   | .   | .   | .   | .   | .   | .   | .   | .   | T   | .   | .   | .   | .   | C   | .   | .   | .   |
| JN086154  | <i>Thunnus tonggol</i> | . | . | . | C  | .  | .  | .  | .  | .  | .  | .  | .  | .  | A  | .  | .  | .  | .   | .   | .   | .   | .   | .   | .   | .   | .   | T   | .   | .   | .   | .   | C   | .   | .   | .   |
| NC 020673 | <i>Thunnus tonggol</i> | . | . | . | C  | .  | .  | .  | .  | .  | .  | .  | .  | .  | A  | .  | .  | .  | .   | .   | .   | .   | .   | .   | .   | .   | .   | T   | .   | .   | .   | .   | C   | .   | .   | .   |
|           | LOT-IO-L1-1            | . | . | . | .  | .  | .  | .  | .  | .  | .  | .  | .  | .  | T  | .  | .  | .  | .   | .   | .   | G   | .   | .   | .   | .   | .   | T   | .   | .   | .   | .   | .   | .   | C   | C   |
|           | LOT-IO-L1-2            | . | . | . | .  | .  | .  | .  | .  | .  | .  | .  | .  | .  | T  | .  | .  | .  | .   | .   | .   | G   | .   | .   | .   | .   | .   | T   | .   | .   | .   | .   | .   | .   | C   | C   |
|           | LOT-IO-L1-3            | . | . | . | .  | .  | T  | .  | .  | .  | .  | .  | .  | .  | T  | .  | .  | .  | .   | .   | .   | G   | .   | .   | .   | .   | .   | T   | .   | .   | .   | .   | .   | .   | C   | C   |
